# Supplementary material
Source: publisher site journal article supplement (https://www.spandidos-publications.com/3247/downloadSupplementary)
Supplement: Supplementary file 1 [file downloadSupplementary]

## Sheet: B_vs_A.gene_DE.addAnno
Table SI: Gene expression after SOX9-knockdown in MDA-MB-231 cells.
Gene ID	MeanTPM (shCOX9)	MeanTPM (shNC)	log2 fold-change	P-value	q value	Result	Gene name	Gene description
ENSG00000259132	0.0001	25.8471	-17.9796	0.00594889	0.13779	-	AL132780.3	-
ENSG00000261796	0.0001	4.89384	-15.5787	0.0953078	0.829468	-	ISY1-RAB43	ISY1-RAB43 readthrough [Source:HGNC Symbol;Acc:HGNC:42969]
ENSG00000249319	0.0001	3.21424	-14.9722	0.256585	1	-	AC068533.4	-
ENSG00000258092	1.16667e-05	0.29784	-14.6399	0.287831	1	-	AC005841.1	-
ENSG00000198211	0.0001	1.06647	-13.3806	0.0928753	0.413395	-	AC092143.1	-
ENSG00000169906	0.0001	0.970893	-13.2451	0.0987249	1	-	S100G	S100 calcium binding protein G [Source:HGNC Symbol;Acc:HGNC:1436]
ENSG00000278598	0.0001	0.926408	-13.1774	0.416264	1	-	MIR6775	microRNA 6775 [Source:HGNC Symbol;Acc:HGNC:50100]
ENSG00000207231	0.0001	0.882459	-13.1073	0.416835	1	-	Y_RNA	Y RNA [Source:RFAM;Acc:RF00019]
ENSG00000252906	0.0001	0.846739	-13.0477	0.230459	1	-	SCARNA3	small Cajal body-specific RNA 3 [Source:HGNC Symbol;Acc:HGNC:32577]
ENSG00000200873	0.0001	0.802729	-12.9707	0.333578	1	-	RNA5SP399	RNA, 5S ribosomal pseudogene 399 [Source:HGNC Symbol;Acc:HGNC:43299]
ENSG00000169442	0.0001	0.800791	-12.9672	0.0735256	1	-	CD52	CD52 molecule [Source:HGNC Symbol;Acc:HGNC:1804]
ENSG00000278050	0.00312333	24.7834	-12.954	1	1	-	NEAT1_2	Nuclear enriched abundant transcript 1 conserved region 2 [Source:RFAM;Acc:RF01956]
ENSG00000267057	0.0001	0.756701	-12.8855	0.67492	1	-	LINC01905	long intergenic non-protein coding RNA 1905 [Source:HGNC Symbol;Acc:HGNC:52724]
ENSG00000199719	0.0001	0.746484	-12.8659	0.522827	1	-	RN7SKP74	RNA, 7SK small nuclear pseudogene 74 [Source:HGNC Symbol;Acc:HGNC:45798]
ENSG00000232936	0.0001	0.726984	-12.8277	0.534203	1	-	AL157400.2	-
ENSG00000279333	0.0001	0.691266	-12.755	1	1	-	AC096636.1	-
ENSG00000265883	0.0001	0.683137	-12.738	0.421228	1	-	AC060771.1	-
ENSG00000272647	0.0001	0.679826	-12.7309	0.215333	1	-	AC005020.2	-
ENSG00000284288	0.0001	0.676428	-12.7237	0.40894	1	-	MIR378D2	microRNA 378d-2 [Source:HGNC Symbol;Acc:HGNC:41797]
ENSG00000262202	0.0001	0.654328	-12.6758	0.12281	1	-	AC007952.4	-
ENSG00000217576	0.0001	0.646567	-12.6586	1	1	-	AL158066.1	-
ENSG00000248479	0.0001	0.639705	-12.6432	0.0284915	1	-	AC104137.1	-
ENSG00000252128	0.0001	0.609191	-12.5727	0.648195	1	-	SNORD27	Small nucleolar RNA SNORD27 [Source:RFAM;Acc:RF00086]
ENSG00000260823	0.0001	0.598271	-12.5466	0.0207232	1	-	AC026461.3	-
ENSG00000263212	0.0001	0.589739	-12.5259	0.0554368	1	-	AC004224.2	-
ENSG00000223203	0.0001	0.588737	-12.5234	0.403093	1	-	RNA5SP221	RNA, 5S ribosomal pseudogene 221 [Source:HGNC Symbol;Acc:HGNC:43121]
ENSG00000227071	0.0001	0.587175	-12.5196	0.153431	1	-	FOCAD-AS1	FOCAD antisense RNA 1 [Source:HGNC Symbol;Acc:HGNC:49789]
ENSG00000275695	0.0001	0.582174	-12.5072	0.0241524	1	-	UBE2Q2P6	ubiquitin conjugating enzyme E2 Q2 pseudogene 6 [Source:HGNC Symbol;Acc:HGNC:49412]
ENSG00000274515	0.0001	0.582105	-12.5071	0.0206658	1	-	AC105020.5	-
ENSG00000255432	0.0001	0.581559	-12.5057	0.0527885	1	-	AP001458.2	-
ENSG00000227857	0.0001	0.558594	-12.4476	0.0670609	1	-	AL358075.2	-
ENSG00000259730	0.0001	0.556698	-12.4427	0.323055	1	-	AC092078.1	-
ENSG00000277726	0.0001	0.550266	-12.4259	0.0217736	1	-	AL109811.4	-
ENSG00000275157	0.0001	0.5273	-12.3644	0.543585	1	-	AC068134.4	-
ENSG00000198975	0.0001	0.517084	-12.3362	0.515319	1	-	MIRLET7A2	microRNA let-7a-2 [Source:HGNC Symbol;Acc:HGNC:31477]
ENSG00000276261	0.0001	0.515078	-12.3306	0.0205296	1	-	AC009509.4	-
ENSG00000199550	0.0001	0.509531	-12.315	0.413357	1	-	Y_RNA	Y RNA [Source:RFAM;Acc:RF00019]
ENSG00000200815	0.0001	0.499375	-12.2859	0.523293	1	-	RNU6-1091P	RNA, U6 small nuclear 1091, pseudogene [Source:HGNC Symbol;Acc:HGNC:48054]
ENSG00000259340	0.0001	0.49776	-12.2812	0.535162	1	-	AC110588.1	-
ENSG00000201659	0.0001	0.489228	-12.2563	0.47456	1	-	RNU12-2P	RNA, U12 small nuclear 2, pseudogene [Source:HGNC Symbol;Acc:HGNC:10109]
ENSG00000267175	0.0001	0.484939	-12.2436	0.0744081	1	-	AC105094.2	-
ENSG00000252469	0.0001	0.469122	-12.1957	0.642001	1	-	RNU7-160P	RNA, U7 small nuclear 160 pseudogene [Source:HGNC Symbol;Acc:HGNC:45694]
ENSG00000211765	0.0001	0.461983	-12.1736	0.643821	1	-	TRBJ2-2	T-cell receptor beta joining 2-2 [Source:HGNC Symbol;Acc:HGNC:12169]
ENSG00000207199	0.0001	0.460765	-12.1698	0.63951	1	-	SNORD38	Small nucleolar RNA SNORD38 [Source:RFAM;Acc:RF00212]
ENSG00000272104	0.0001	0.458858	-12.1638	0.301517	1	-	Z84492.1	-
ENSG00000277634	0.0001	0.455911	-12.1545	0.648195	1	-	Y_RNA	Y RNA [Source:RFAM;Acc:RF00019]
ENSG00000229048	0.0001	0.453379	-12.1465	0.11756	1	-	DUTP1	deoxyuridine triphosphatase pseudogene 1 [Source:HGNC Symbol;Acc:HGNC:31956]
ENSG00000262165	0.0001	0.448829	-12.1319	0.0844323	1	-	AC233723.1	-
ENSG00000269300	0.0001	0.438907	-12.0997	0.0205077	1	-	AC008734.1	-
ENSG00000207944	0.0001	0.435167	-12.0874	0.63951	1	-	MIR574	microRNA 574 [Source:HGNC Symbol;Acc:HGNC:32830]
ENSG00000200693	0.0001	0.430548	-12.072	0.283891	1	-	U3	Small nucleolar RNA U3 [Source:RFAM;Acc:RF00012]
ENSG00000207344	0.0001	0.423092	-12.0468	0.515319	1	-	SNORA22C	small nucleolar RNA, H/ACA box 22C [Source:HGNC Symbol;Acc:HGNC:52197]
ENSG00000268643	0.0001	0.416511	-12.0241	0.100692	1	-	AC006486.1	-
ENSG00000275207	0.0001	0.416033	-12.0225	0.540009	1	-	MIR6740	microRNA 6740 [Source:HGNC Symbol;Acc:HGNC:50082]
ENSG00000227852	0.0001	0.408836	-11.9973	0.198534	1	-	RPS29P17	ribosomal protein S29 pseudogene 17 [Source:HGNC Symbol;Acc:HGNC:35479]
ENSG00000266941	0.0001	0.408615	-11.9965	0.216571	1	-	AC024592.1	-
ENSG00000283200	0.0001	0.407296	-11.9919	0.642001	1	-	MIR1206	microRNA 1206 [Source:HGNC Symbol;Acc:HGNC:35272]
ENSG00000226963	0.0001	0.392918	-11.94	0.100252	1	-	AC078883.2	-
ENSG00000228176	0.0001	0.392428	-11.9382	0.154973	1	-	AC092265.1	-
ENSG00000234318	0.0001	0.391833	-11.936	0.181207	1	-	AC099794.1	-
ENSG00000242925	0.0001	0.391399	-11.9344	0.348163	1	-	PLCH1-AS2	PLCH1 antisense RNA 2 [Source:HGNC Symbol;Acc:HGNC:41232]
ENSG00000277234	0.0001	0.383305	-11.9043	0.540009	1	-	RNU1-5P	RNA, U1 small nuclear 5, pseudogene [Source:HGNC Symbol;Acc:HGNC:48304]
ENSG00000202490	0.0001	0.382878	-11.9027	0.642001	1	-	RNU6-597P	RNA, U6 small nuclear 597, pseudogene [Source:HGNC Symbol;Acc:HGNC:47560]
ENSG00000201340	0.0001	0.381135	-11.8961	0.543585	1	-	Y_RNA	Y RNA [Source:RFAM;Acc:RF00019]
ENSG00000239218	0.0001	0.374508	-11.8708	0.348163	1	-	RPS20P22	ribosomal protein S20 pseudogene 22 [Source:HGNC Symbol;Acc:HGNC:36379]
ENSG00000253024	0.0001	0.373215	-11.8658	0.643821	1	-	RNU6-1238P	RNA, U6 small nuclear 1238, pseudogene [Source:HGNC Symbol;Acc:HGNC:48201]
ENSG00000276019	0.0001	0.372452	-11.8628	0.466529	1	-	HULC	Highly up-regulated in liver cancer conserved region [Source:RFAM;Acc:RF02101]
ENSG00000280212	0.0001	0.367329	-11.8429	0.184825	1	-	AC012254.5	-
ENSG00000275982	0.0001	0.362736	-11.8247	0.523293	1	-	Y_RNA	Y RNA [Source:RFAM;Acc:RF00019]
ENSG00000105246	0.0001	0.36194	-11.8215	0.013485	1	-	EBI3	Epstein-Barr virus induced 3 [Source:HGNC Symbol;Acc:HGNC:3129]
ENSG00000276144	0.0001	0.359334	-11.8111	0.223848	1	-	AC233309.1	-
ENSG00000273293	0.0001	0.349274	-11.7701	0.471148	1	-	AC093458.1	-
ENSG00000199072	0.0001	0.347869	-11.7643	0.648195	1	-	MIRLET7F1	microRNA let-7f-1 [Source:HGNC Symbol;Acc:HGNC:31483]
ENSG00000207327	0.0001	0.346668	-11.7593	0.521603	1	-	RNU6-883P	RNA, U6 small nuclear 883, pseudogene [Source:HGNC Symbol;Acc:HGNC:47846]
ENSG00000200714	0.0001	0.345974	-11.7564	0.644512	1	-	Y_RNA	Y RNA [Source:RFAM;Acc:RF00019]
ENSG00000265490	0.0001	0.344897	-11.7519	0.133008	1	-	AP001178.2	-
ENSG00000276524	0.0001	0.342799	-11.7431	0.0352089	1	-	AC010999.2	-
ENSG00000243762	0.0001	0.341448	-11.7375	0.144816	1	-	AC006547.2	-
ENSG00000252414	0.0001	0.34127	-11.7367	0.644512	1	-	RNU6-100P	RNA, U6 small nuclear 100, pseudogene [Source:HGNC Symbol;Acc:HGNC:47063]
ENSG00000230166	0.0001	0.340084	-11.7317	0.198534	1	-	RPL35AP24	ribosomal protein L35a pseudogene 24 [Source:HGNC Symbol;Acc:HGNC:35544]
ENSG00000207276	0.0001	0.33819	-11.7236	0.63951	1	-	RNU6-1160P	RNA, U6 small nuclear 1160, pseudogene [Source:HGNC Symbol;Acc:HGNC:48123]
ENSG00000223756	0.0001	0.334407	-11.7074	0.0519529	1	-	TSSC2	tumor suppressing subtransferable candidate 2 pseudogene [Source:HGNC Symbol;Acc:HGNC:12384]
ENSG00000270988	0.0001	0.333097	-11.7017	0.0704099	1	-	AC019257.2	-
ENSG00000273248	0.0001	0.329136	-11.6845	0.266855	1	-	AC010997.5	-
ENSG00000259017	0.0001	0.32855	-11.6819	0.0602435	1	-	AL133163.3	-
ENSG00000255007	0.0001	0.327915	-11.6791	0.260353	1	-	AC116021.2	-
ENSG00000233956	0.0001	0.326273	-11.6719	0.0799092	1	-	BTF3P6	basic transcription factor 3 pseudogene 6 [Source:HGNC Symbol;Acc:HGNC:23765]
ENSG00000253858	0.0001	0.323038	-11.6575	0.326881	1	-	AC008619.1	-
ENSG00000199290	0.0001	0.31943	-11.6413	0.646348	1	-	Y_RNA	Y RNA [Source:RFAM;Acc:RF00019]
ENSG00000205361	0.0001	0.311516	-11.6051	0.47456	1	-	MT1DP	metallothionein 1D, pseudogene [Source:HGNC Symbol;Acc:HGNC:7396]
ENSG00000265254	0.0001	0.310737	-11.6015	0.214176	1	-	AC015917.2	-
ENSG00000228181	0.0001	0.308224	-11.5898	0.326714	1	-	AL590365.1	-
ENSG00000256825	0.0001	0.307268	-11.5853	0.119885	1	-	AC026786.1	-
ENSG00000273627	0.0001	0.307177	-11.5849	0.812184	1	-	MIR4726	microRNA 4726 [Source:HGNC Symbol;Acc:HGNC:41722]
ENSG00000270395	0.0001	0.307177	-11.5849	0.63951	1	-	MREGP1	melanoregulin pseudogene 1 [Source:HGNC Symbol;Acc:HGNC:50749]
ENSG00000207719	0.0001	0.307177	-11.5849	0.63951	1	-	MIR623	microRNA 623 [Source:HGNC Symbol;Acc:HGNC:32879]
ENSG00000211991	0.0001	0.307177	-11.5849	0.812184	1	-	MIR676	microRNA 676 [Source:HGNC Symbol;Acc:HGNC:38880]
ENSG00000212391	0.0001	0.30641	-11.5812	0.644512	1	-	SNORA48	Small nucleolar RNA SNORA48 [Source:RFAM;Acc:RF00554]
ENSG00000227591	0.0001	0.305843	-11.5786	0.385951	1	-	AL031316.1	-
ENSG00000251914	0.0001	0.305271	-11.5759	0.812184	1	-	RNU7-200P	RNA, U7 small nuclear 200 pseudogene [Source:HGNC Symbol;Acc:HGNC:45734]
ENSG00000266802	0.0001	0.305271	-11.5759	0.644512	1	-	MIR4419A	microRNA 4419a [Source:HGNC Symbol;Acc:HGNC:41828]
ENSG00000241912	0.0001	0.305004	-11.5746	0.260353	1	-	AC078788.2	-
ENSG00000278182	0.0001	0.301865	-11.5597	0.198534	1	-	AC239860.2	-
ENSG00000266750	0.0001	0.301307	-11.557	0.644512	1	-	MIR4645	microRNA 4645 [Source:HGNC Symbol;Acc:HGNC:41689]
ENSG00000272366	0.0001	0.300424	-11.5528	0.405532	1	-	AL158211.3	-
ENSG00000223300	0.0001	0.300049	-11.551	0.40196	1	-	Y_RNA	Y RNA [Source:RFAM;Acc:RF00019]
ENSG00000233203	0.0001	0.298543	-11.5437	0.209213	1	-	AC096536.1	-
ENSG00000251985	0.0001	0.296293	-11.5328	0.644512	1	-	RNU6-1161P	RNA, U6 small nuclear 1161, pseudogene [Source:HGNC Symbol;Acc:HGNC:48124]
ENSG00000226755	0.0001	0.294243	-11.5228	0.209213	1	-	VPS25P1	VPS25 pseudogene 1 [Source:HGNC Symbol;Acc:HGNC:44250]
ENSG00000221598	0.0001	0.293214	-11.5177	0.812184	1	-	MIR1249	microRNA 1249 [Source:HGNC Symbol;Acc:HGNC:35315]
ENSG00000207451	0.0001	0.292433	-11.5139	0.644512	1	-	RNU6-291P	RNA, U6 small nuclear 291, pseudogene [Source:HGNC Symbol;Acc:HGNC:47254]
ENSG00000265201	0.0001	0.292412	-11.5138	0.648195	1	-	MIR4677	microRNA 4677 [Source:HGNC Symbol;Acc:HGNC:41844]
ENSG00000206954	0.0001	0.292412	-11.5138	0.648195	1	-	RNU6-1201P	RNA, U6 small nuclear 1201, pseudogene [Source:HGNC Symbol;Acc:HGNC:48164]
ENSG00000278349	0.0001	0.292412	-11.5138	0.812184	1	-	MIR6754	microRNA 6754 [Source:HGNC Symbol;Acc:HGNC:50203]
ENSG00000221063	0.0001	0.292152	-11.5125	0.63951	1	-	MIR1296	microRNA 1296 [Source:HGNC Symbol;Acc:HGNC:35249]
ENSG00000212576	0.0001	0.290888	-11.5062	0.644512	1	-	RNA5SP467	RNA, 5S ribosomal pseudogene 467 [Source:HGNC Symbol;Acc:HGNC:43367]
ENSG00000239742	0.0001	0.290703	-11.5053	0.466529	1	-	RN7SL672P	RNA, 7SL, cytoplasmic 672, pseudogene [Source:HGNC Symbol;Acc:HGNC:46688]
ENSG00000255772	0.0001	0.289421	-11.499	0.174843	1	-	LINC01479	long intergenic non-protein coding RNA 1479 [Source:HGNC Symbol;Acc:HGNC:51123]
ENSG00000230099	0.0001	0.288858	-11.4961	0.0660115	1	-	TRBV5-4	T-cell receptor beta variable 5-4 [Source:HGNC Symbol;Acc:HGNC:12221]
ENSG00000224031	0.0001	0.28715	-11.4876	0.325095	1	-	TCEAL3-AS1	TCEAL3 antisense RNA 1 [Source:HGNC Symbol;Acc:HGNC:41191]
ENSG00000263813	0.0001	0.28459	-11.4747	0.812184	1	-	MIR3679	microRNA 3679 [Source:HGNC Symbol;Acc:HGNC:38979]
ENSG00000242102	0.0001	0.283759	-11.4704	0.471148	1	-	RN7SL152P	RNA, 7SL, cytoplasmic 152, pseudogene [Source:HGNC Symbol;Acc:HGNC:46168]
ENSG00000258064	0.0001	0.283018	-11.4667	0.271814	1	-	AC073612.1	-
ENSG00000237137	0.0001	0.282989	-11.4665	0.63951	1	-	AL159169.1	-
ENSG00000230299	0.0001	0.282979	-11.4665	0.648195	1	-	AC093162.1	-
ENSG00000207248	0.0001	0.282447	-11.4638	0.644512	1	-	RNU6-1005P	RNA, U6 small nuclear 1005, pseudogene [Source:HGNC Symbol;Acc:HGNC:47968]
ENSG00000239856	0.0001	0.282117	-11.4621	0.40894	1	-	RN7SL225P	RNA, 7SL, cytoplasmic 225, pseudogene [Source:HGNC Symbol;Acc:HGNC:46241]
ENSG00000206660	0.0001	0.281524	-11.459	0.648195	1	-	Y_RNA	Y RNA [Source:RFAM;Acc:RF00019]
ENSG00000235126	0.0001	0.27812	-11.4415	0.214176	1	-	AC128709.2	-
ENSG00000263969	0.0001	0.277383	-11.4377	0.466529	1	-	RN7SL678P	RNA, 7SL, cytoplasmic 678, pseudogene [Source:HGNC Symbol;Acc:HGNC:46694]
ENSG00000200785	0.0001	0.276462	-11.4329	0.648195	1	-	SNORD8	small nucleolar RNA, C/D box 8 [Source:HGNC Symbol;Acc:HGNC:20159]
ENSG00000228078	0.0001	0.274627	-11.4233	0.540009	1	-	HLA-U	major histocompatibility complex, class I, U (pseudogene) [Source:HGNC Symbol;Acc:HGNC:23477]
ENSG00000206715	0.0001	0.274179	-11.4209	0.644512	1	-	RNU6-444P	RNA, U6 small nuclear 444, pseudogene [Source:HGNC Symbol;Acc:HGNC:47407]
ENSG00000254172	0.0001	0.271892	-11.4088	0.648195	1	-	RNU5A-3P	RNA, U5A small nuclear 3, pseudogene [Source:HGNC Symbol;Acc:HGNC:42519]
ENSG00000238406	0.0001	0.270805	-11.403	0.812184	1	-	RNU7-171P	RNA, U7 small nuclear 171 pseudogene [Source:HGNC Symbol;Acc:HGNC:45705]
ENSG00000259874	0.0001	0.270297	-11.4003	0.543585	1	-	AC034105.2	-
ENSG00000263881	0.0001	0.270045	-11.399	0.63951	1	-	MIR4436B2	microRNA 4436b-2 [Source:HGNC Symbol;Acc:HGNC:43451]
ENSG00000264979	0.0001	0.270045	-11.399	0.63951	1	-	MIR4436B1	microRNA 4436b-1 [Source:HGNC Symbol;Acc:HGNC:41587]
ENSG00000276831	0.0001	0.269701	-11.3971	0.471148	1	-	AC020922.4	-
ENSG00000257231	0.0001	0.267399	-11.3848	0.471148	1	-	DYNLL1P4	dynein light chain LC8-type 1 pseudogene 4 [Source:HGNC Symbol;Acc:HGNC:49655]
ENSG00000273262	0.0001	0.2666	-11.3805	0.352159	1	-	AL121928.1	-
ENSG00000201957	0.0001	0.26638	-11.3793	0.63951	1	-	SNORA25	Small nucleolar RNA SNORA25 [Source:RFAM;Acc:RF00402]
ENSG00000254571	0.0001	0.266082	-11.3777	0.471148	1	-	AL358937.1	-
ENSG00000260132	0.0001	0.265436	-11.3741	0.416835	1	-	AL032819.1	-
ENSG00000251866	0.0001	0.264391	-11.3685	0.63951	1	-	SCARNA21	Small Cajal body specific RNA 21 [Source:RFAM;Acc:RF00602]
ENSG00000253457	0.0001	0.264389	-11.3684	0.40196	1	-	SMIM18	small integral membrane protein 18 [Source:HGNC Symbol;Acc:HGNC:42973]
ENSG00000238456	0.0001	0.263933	-11.366	0.63951	1	-	RNU6-1014P	RNA, U6 small nuclear 1014, pseudogene [Source:HGNC Symbol;Acc:HGNC:47977]
ENSG00000263321	0.0001	0.26182	-11.3544	0.338533	1	-	AC024361.3	-
ENSG00000280049	0.0001	0.261715	-11.3538	0.265456	1	-	AC079597.1	-
ENSG00000160472	0.0001	0.261408	-11.3521	0.066229	1	-	TMEM190	transmembrane protein 190 [Source:HGNC Symbol;Acc:HGNC:29632]
ENSG00000131738	0.0001	0.260941	-11.3495	0.00168198	1	-	KRT33B	keratin 33B [Source:HGNC Symbol;Acc:HGNC:6451]
ENSG00000254338	0.0001	0.26094	-11.3495	0.261704	1	-	MAFA-AS1	MAFA antisense RNA 1 [Source:HGNC Symbol;Acc:HGNC:51203]
ENSG00000275711	0.0001	0.260161	-11.3452	0.812184	1	-	MIR6795	microRNA 6795 [Source:HGNC Symbol;Acc:HGNC:50031]
ENSG00000273609	0.0001	0.259893	-11.3437	0.644512	1	-	AC005562.2	-
ENSG00000250451	0.0001	0.259022	-11.3389	0.0799092	1	-	HOXC-AS1	HOXC cluster antisense RNA 1 [Source:HGNC Symbol;Acc:HGNC:43749]
ENSG00000171649	0.0001	0.258791	-11.3376	0.211978	1	-	ZIK1	zinc finger protein interacting with K protein 1 [Source:HGNC Symbol;Acc:HGNC:33104]
ENSG00000274428	0.0001	0.25822	-11.3344	0.63951	1	-	U1	U1 spliceosomal RNA [Source:RFAM;Acc:RF00003]
ENSG00000241983	0.0001	0.257719	-11.3316	0.40894	1	-	RN7SL566P	RNA, 7SL, cytoplasmic 566, pseudogene [Source:HGNC Symbol;Acc:HGNC:46582]
ENSG00000221493	0.0001	0.257522	-11.3305	0.648195	1	-	MIR320C1	microRNA 320c-1 [Source:HGNC Symbol;Acc:HGNC:35248]
ENSG00000222255	0.0001	0.256965	-11.3274	0.63951	1	-	RNU6-101P	RNA, U6 small nuclear 101, pseudogene [Source:HGNC Symbol;Acc:HGNC:47064]
ENSG00000249641	0.0001	0.256862	-11.3268	0.00609531	1	-	HOXC13-AS	HOXC13 antisense RNA [Source:HGNC Symbol;Acc:HGNC:43753]
ENSG00000261775	0.0001	0.254747	-11.3148	0.424476	1	-	AC012435.2	-
ENSG00000252782	0.0001	0.254393	-11.3128	0.644512	1	-	RNU6-341P	RNA, U6 small nuclear 341, pseudogene [Source:HGNC Symbol;Acc:HGNC:47304]
ENSG00000201818	0.0001	0.254381	-11.3128	0.63951	1	-	RNY4P17	RNA, Ro-associated Y4 pseudogene 17 [Source:HGNC Symbol;Acc:HGNC:34067]
ENSG00000222679	0.0001	0.254152	-11.3115	0.648195	1	-	RNU6-1267P	RNA, U6 small nuclear 1267, pseudogene [Source:HGNC Symbol;Acc:HGNC:48230]
ENSG00000269099	0.0001	0.254056	-11.3109	0.63951	1	-	LSP1P1	lymphocyte-specific protein 1 pseudogene 1 [Source:HGNC Symbol;Acc:HGNC:39716]
ENSG00000266934	0.0001	0.253924	-11.3102	0.0484097	1	-	AC005746.1	-
ENSG00000207737	0.0001	0.253679	-11.3088	0.812184	1	-	MIR181B2	microRNA 181b-2 [Source:HGNC Symbol;Acc:HGNC:31551]
ENSG00000271052	0.0001	0.253196	-11.306	0.516978	1	-	AC108738.1	-
ENSG00000207260	0.0001	0.252786	-11.3037	0.648195	1	-	RNU6-35P	RNA, U6 small nuclear 35, pseudogene [Source:HGNC Symbol;Acc:HGNC:34279]
ENSG00000199226	0.0001	0.252667	-11.303	0.648195	1	-	RNU6-50P	RNA, U6 small nuclear 50, pseudogene [Source:HGNC Symbol;Acc:HGNC:10229]
ENSG00000252747	0.0001	0.251877	-11.2985	0.646348	1	-	RNA5SP364	RNA, 5S ribosomal pseudogene 364 [Source:HGNC Symbol;Acc:HGNC:43264]
ENSG00000240755	0.0001	0.251314	-11.2953	0.0863489	1	-	ERLEC1P1	endoplasmic reticulum lectin 1 pseudogene 1 [Source:HGNC Symbol;Acc:HGNC:38012]
ENSG00000278482	0.0001	0.250926	-11.293	0.40196	1	-	ST7-OT3_3	ST7 overlapping transcript 3 conserved region 3 [Source:RFAM;Acc:RF02185]
ENSG00000202517	0.0001	0.249859	-11.2869	0.648195	1	-	SNORA64	Small nucleolar RNA SNORA64/SNORA10 family [Source:RFAM;Acc:RF00264]
ENSG00000103490	0.0001	0.249423	-11.2844	0.227526	1	-	PYCARD	PYD and CARD domain containing [Source:HGNC Symbol;Acc:HGNC:16608]
ENSG00000221763	0.0001	0.248753	-11.2805	0.648195	1	-	MIR1289-1	microRNA 1289-1 [Source:HGNC Symbol;Acc:HGNC:35281]
ENSG00000235643	0.0001	0.248134	-11.2769	0.0118655	1	-	LINC01647	long intergenic non-protein coding RNA 1647 [Source:HGNC Symbol;Acc:HGNC:52434]
ENSG00000221203	0.0001	0.247828	-11.2751	0.812184	1	-	MIR1262	microRNA 1262 [Source:HGNC Symbol;Acc:HGNC:35328]
ENSG00000263982	0.0001	0.247498	-11.2732	0.32237	1	-	AC009716.1	-
ENSG00000273232	0.0001	0.247154	-11.2712	0.124593	1	-	AC090912.3	-
ENSG00000244167	0.0001	0.246159	-11.2654	0.424476	1	-	AC005532.2	-
ENSG00000253299	0.0001	0.243712	-11.251	0.285306	1	-	AC025647.1	-
ENSG00000264119	0.0001	0.243531	-11.2499	0.812184	1	-	MIR4795	microRNA 4795 [Source:HGNC Symbol;Acc:HGNC:41757]
ENSG00000266072	0.0001	0.242341	-11.2428	0.812184	1	-	MIR5693	microRNA 5693 [Source:HGNC Symbol;Acc:HGNC:43499]
ENSG00000158525	0.0001	0.241608	-11.2385	0.00940295	1	-	CPA5	carboxypeptidase A5 [Source:HGNC Symbol;Acc:HGNC:15722]
ENSG00000233820	0.0001	0.241003	-11.2348	0.323055	1	-	AL589843.2	-
ENSG00000235700	0.0001	0.240787	-11.2335	0.466529	1	-	CYCSP52	cytochrome c, somatic pseudogene 52 [Source:HGNC Symbol;Acc:HGNC:24393]
ENSG00000242441	0.0001	0.240496	-11.2318	0.266855	1	-	GTF2A1L	general transcription factor IIA subunit 1 like [Source:HGNC Symbol;Acc:HGNC:30727]
ENSG00000201003	0.0001	0.240177	-11.2299	0.644512	1	-	SNORA58	Small nucleolar RNA SNORA58 [Source:RFAM;Acc:RF00418]
ENSG00000214354	0.0001	0.239382	-11.2251	0.0400871	1	-	AC133644.1	-
ENSG00000201770	0.0001	0.239018	-11.2229	0.643821	1	-	RNU6-384P	RNA, U6 small nuclear 384, pseudogene [Source:HGNC Symbol;Acc:HGNC:47347]
ENSG00000252768	0.0001	0.238218	-11.2181	0.63951	1	-	RNU6-856P	RNA, U6 small nuclear 856, pseudogene [Source:HGNC Symbol;Acc:HGNC:47819]
ENSG00000238260	0.0001	0.237747	-11.2152	0.348163	1	-	AL513320.1	-
ENSG00000220694	0.0001	0.23707	-11.2111	0.265456	1	-	AL096711.1	-
ENSG00000207571	0.0001	0.236782	-11.2093	0.812184	1	-	MIR615	microRNA 615 [Source:HGNC Symbol;Acc:HGNC:32871]
ENSG00000274973	0.0001	0.236356	-11.2067	0.325095	1	-	BSNDP2	barttin CLCNK type accessory beta subunit pseudogene 2 [Source:HGNC Symbol;Acc:HGNC:51537]
ENSG00000253056	0.0001	0.236339	-11.2066	0.812184	1	-	RNU7-128P	RNA, U7 small nuclear 128 pseudogene [Source:HGNC Symbol;Acc:HGNC:45662]
ENSG00000250808	0.0001	0.235376	-11.2007	0.47456	1	-	MTCO2P30	mitochondrially encoded cytochrome c oxidase II pseudogene 30 [Source:HGNC Symbol;Acc:HGNC:52159]
ENSG00000219902	0.0001	0.235143	-11.1993	0.466529	1	-	RPL35P3	ribosomal protein L35 pseudogene 3 [Source:HGNC Symbol;Acc:HGNC:35488]
ENSG00000270140	0.0001	0.235115	-11.1992	0.212391	1	-	AC005520.3	-
ENSG00000221091	0.0001	0.234753	-11.1969	0.642001	1	-	MIR1302-5	microRNA 1302-5 [Source:HGNC Symbol;Acc:HGNC:35297]
ENSG00000207943	0.0001	0.232121	-11.1807	0.648195	1	-	MIR634	microRNA 634 [Source:HGNC Symbol;Acc:HGNC:32890]
ENSG00000222747	0.0001	0.231779	-11.1785	0.63951	1	-	RNA5SP25	RNA, 5S ribosomal pseudogene 25 [Source:HGNC Symbol;Acc:HGNC:42601]
ENSG00000232754	0.0001	0.230235	-11.1689	0.405532	1	-	AL035658.1	-
ENSG00000199377	0.0001	0.229931	-11.167	0.648195	1	-	RNU5F-1	RNA, U5F small nuclear 1 [Source:HGNC Symbol;Acc:HGNC:10216]
ENSG00000228323	0.0001	0.229141	-11.162	0.133008	1	-	AC008440.1	-
ENSG00000241772	0.0001	0.227776	-11.1534	0.262307	1	-	AC092620.2	-
ENSG00000270100	0.0001	0.227631	-11.1525	0.219202	1	-	AC012065.4	-
ENSG00000207142	0.0001	0.227457	-11.1514	0.644512	1	-	Y_RNA	Y RNA [Source:RFAM;Acc:RF00019]
ENSG00000260740	0.0001	0.227034	-11.1487	0.266855	1	-	AC026471.3	-
ENSG00000201641	0.0001	0.226194	-11.1433	0.63951	1	-	RNU6-1187P	RNA, U6 small nuclear 1187, pseudogene [Source:HGNC Symbol;Acc:HGNC:48150]
ENSG00000207002	0.0001	0.22604	-11.1424	0.644512	1	-	SNORA5	Small nucleolar RNA SNORA5 [Source:RFAM;Acc:RF00392]
ENSG00000201501	0.0001	0.225043	-11.136	0.648195	1	-	Y_RNA	Y RNA [Source:RFAM;Acc:RF00019]
ENSG00000245598	0.0001	0.224722	-11.1339	0.262307	1	-	DACT3-AS1	DACT3 antisense RNA 1 [Source:HGNC Symbol;Acc:HGNC:44120]
ENSG00000267051	0.0001	0.224595	-11.1331	0.181207	1	-	AP005229.1	-
ENSG00000267178	0.0001	0.223057	-11.1232	0.466529	1	-	PHF5CP	PHD finger protein 5C pseudogene [Source:HGNC Symbol;Acc:HGNC:32385]
ENSG00000199875	0.0001	0.222875	-11.122	0.644512	1	-	Y_RNA	Y RNA [Source:RFAM;Acc:RF00019]
ENSG00000267755	0.0001	0.22242	-11.1191	0.424476	1	-	AC005329.2	-
ENSG00000260962	0.0001	0.222252	-11.118	0.0133312	1	-	LINC00557	long intergenic non-protein coding RNA 557 [Source:HGNC Symbol;Acc:HGNC:43701]
ENSG00000196866	0.0001	0.221727	-11.1146	0.47456	1	-	HIST1H2AD	histone cluster 1 H2A family member d [Source:HGNC Symbol;Acc:HGNC:4729]
ENSG00000234041	0.0001	0.220951	-11.1095	0.63951	1	-	AL512326.3	-
ENSG00000264357	0.0001	0.220361	-11.1057	0.646348	1	-	MIR4648	microRNA 4648 [Source:HGNC Symbol;Acc:HGNC:41560]
ENSG00000241984	0.0001	0.220232	-11.1048	0.0704099	1	-	RPL7AP2	ribosomal protein L7a pseudogene 2 [Source:HGNC Symbol;Acc:HGNC:23552]
ENSG00000212195	0.0001	0.219887	-11.1025	0.516978	1	-	U3	Small nucleolar RNA U3 [Source:RFAM;Acc:RF00012]
ENSG00000206645	0.0001	0.219842	-11.1023	0.812184	1	-	Y_RNA	Y RNA [Source:RFAM;Acc:RF00019]
ENSG00000239801	0.0001	0.219711	-11.1014	0.47456	1	-	DENND6A-AS1	DENND6A antisense RNA 1 [Source:HGNC Symbol;Acc:HGNC:41152]
ENSG00000276250	0.0001	0.21965	-11.101	0.257407	1	-	AC127024.6	-
ENSG00000236878	0.0001	0.218723	-11.0949	0.22062	1	-	MTATP6P26	mitochondrially encoded ATP synthase 6 pseudogene 26 [Source:HGNC Symbol;Acc:HGNC:52182]
ENSG00000207034	0.0001	0.217911	-11.0895	0.63951	1	-	Y_RNA	Y RNA [Source:RFAM;Acc:RF00019]
ENSG00000236559	0.0001	0.216673	-11.0813	0.325095	1	-	AL117381.1	-
ENSG00000240869	0.0001	0.216671	-11.0813	0.405532	1	-	RN7SL128P	RNA, 7SL, cytoplasmic 128, pseudogene [Source:HGNC Symbol;Acc:HGNC:46144]
ENSG00000229694	0.0001	0.216316	-11.0789	0.257407	1	-	LINC00484	long intergenic non-protein coding RNA 484 [Source:NCBI gene;Acc:100129347]
ENSG00000274967	0.0001	0.215325	-11.0723	0.644512	1	-	Y_RNA	Y RNA [Source:RFAM;Acc:RF00019]
ENSG00000078579	0.0001	0.215071	-11.0706	0.0447226	1	-	FGF20	fibroblast growth factor 20 [Source:HGNC Symbol;Acc:HGNC:3677]
ENSG00000260304	0.0001	0.214979	-11.07	0.32237	1	-	AC009088.2	-
ENSG00000239082	0.0001	0.214016	-11.0635	0.812184	1	-	RNU7-170P	RNA, U7 small nuclear 170 pseudogene [Source:HGNC Symbol;Acc:HGNC:45704]
ENSG00000272762	0.0001	0.213777	-11.0619	0.37867	1	-	AC115284.1	-
ENSG00000183971	0.0001	0.211729	-11.048	0.259453	1	-	NPW	neuropeptide W [Source:HGNC Symbol;Acc:HGNC:30509]
ENSG00000254765	0.0001	0.211379	-11.0456	0.1184	1	-	AC011092.1	-
ENSG00000266215	0.0001	0.210098	-11.0368	0.812184	1	-	MIR3167	microRNA 3167 [Source:HGNC Symbol;Acc:HGNC:38242]
ENSG00000271199	0.0001	0.209211	-11.0307	0.466529	1	-	AL353804.2	-
ENSG00000276527	0.0001	0.207922	-11.0218	0.471148	1	-	AL356515.1	-
ENSG00000205669	0.0001	0.207347	-11.0178	0.129109	1	-	ACOT6	acyl-CoA thioesterase 6 [Source:HGNC Symbol;Acc:HGNC:33159]
ENSG00000255530	0.0001	0.2073	-11.0175	0.466529	1	-	AF235103.2	-
ENSG00000213872	0.0001	0.205615	-11.0057	0.40894	1	-	AC092798.1	-
ENSG00000226088	0.0001	0.205225	-11.003	0.265456	1	-	AL158839.1	-
ENSG00000270002	0.0001	0.205126	-11.0023	0.000342732	1	-	AC022028.2	-
ENSG00000278524	0.0001	0.204688	-10.9992	0.812184	1	-	MIR6810	microRNA 6810 [Source:HGNC Symbol;Acc:HGNC:49987]
ENSG00000152763	0.0001	0.204398	-10.9972	0.110326	1	-	WDR78	WD repeat domain 78 [Source:HGNC Symbol;Acc:HGNC:26252]
ENSG00000221120	0.0001	0.204182	-10.9956	0.812184	1	-	MIR1224	microRNA 1224 [Source:HGNC Symbol;Acc:HGNC:33923]
ENSG00000229390	0.0001	0.203976	-10.9942	0.172585	1	-	MICD	MHC class I polypeptide-related sequence D (pseudogene) [Source:HGNC Symbol;Acc:HGNC:7093]
ENSG00000278595	0.0001	0.203725	-10.9924	0.338533	1	-	AL133396.2	-
ENSG00000276868	0.0001	0.203209	-10.9887	0.63951	1	-	AL353626.2	-
ENSG00000252755	0.0001	0.202229	-10.9818	0.812184	1	-	RNU6-703P	RNA, U6 small nuclear 703, pseudogene [Source:HGNC Symbol;Acc:HGNC:47666]
ENSG00000236848	0.0001	0.202196	-10.9815	0.535162	1	-	RPL23AP95	ribosomal protein L23a pseudogene 95 [Source:HGNC Symbol;Acc:HGNC:51630]
ENSG00000268149	0.0001	0.201902	-10.9794	0.471148	1	-	AC010336.4	-
ENSG00000239405	0.0001	0.201381	-10.9757	0.262171	1	-	TMED10P2	transmembrane p24 trafficking protein 10 pseudogene 2 [Source:HGNC Symbol;Acc:HGNC:38105]
ENSG00000233189	0.0001	0.201312	-10.9752	0.466529	1	-	RPL12P29	ribosomal protein L12 pseudogene 29 [Source:HGNC Symbol;Acc:HGNC:35791]
ENSG00000249493	0.0001	0.19993	-10.9653	0.416835	1	-	ANKRD20A18P	ankyrin repeat domain 20 family member A18, pseudogene [Source:HGNC Symbol;Acc:HGNC:23756]
ENSG00000207295	0.0001	0.199496	-10.9621	0.812184	1	-	RNU6-851P	RNA, U6 small nuclear 851, pseudogene [Source:HGNC Symbol;Acc:HGNC:47814]
ENSG00000202177	0.0001	0.198518	-10.9551	0.812184	1	-	Y_RNA	Y RNA [Source:RFAM;Acc:RF00019]
ENSG00000237461	0.0001	0.198305	-10.9535	0.0133376	1	-	AL359710.1	-
ENSG00000264078	0.0001	0.198028	-10.9515	0.421228	1	-	AC114488.3	-
ENSG00000264273	0.0001	0.1978	-10.9498	0.471148	1	-	AC107982.2	-
ENSG00000230432	0.0001	0.197541	-10.9479	0.535162	1	-	AC114803.1	-
ENSG00000276770	0.0001	0.197074	-10.9445	0.812184	1	-	MIR6780B	microRNA 6780b [Source:HGNC Symbol;Acc:HGNC:50237]
ENSG00000266262	0.0001	0.195431	-10.9324	0.643821	1	-	MIR4428	microRNA 4428 [Source:HGNC Symbol;Acc:HGNC:41667]
ENSG00000203286	0.0001	0.195395	-10.9322	0.540009	1	-	Metazoa_SRP	Metazoan signal recognition particle RNA [Source:RFAM;Acc:RF00017]
ENSG00000231688	0.0001	0.194308	-10.9241	0.403093	1	-	RPL21P43	ribosomal protein L21 pseudogene 43 [Source:HGNC Symbol;Acc:HGNC:36008]
ENSG00000259314	0.0001	0.194207	-10.9234	0.0696052	1	-	AC103739.2	-
ENSG00000233605	0.0001	0.194105	-10.9226	0.0942099	1	-	LINC01851	long intergenic non-protein coding RNA 1851 [Source:HGNC Symbol;Acc:HGNC:52667]
ENSG00000268375	0.0001	0.193856	-10.9208	0.540009	1	-	AC010325.2	-
ENSG00000225152	0.0001	0.193666	-10.9194	0.403093	1	-	AL160290.1	-
ENSG00000068831	0.0001	0.193153	-10.9155	0.0695689	1	-	RASGRP2	RAS guanyl releasing protein 2 [Source:HGNC Symbol;Acc:HGNC:9879]
ENSG00000207484	0.0001	0.193131	-10.9154	0.812184	1	-	Y_RNA	Y RNA [Source:RFAM;Acc:RF00019]
ENSG00000249965	0.0001	0.191977	-10.9067	0.199448	1	-	CDC42P4	cell division cycle 42 pseudogene 4 [Source:HGNC Symbol;Acc:HGNC:44428]
ENSG00000232880	0.0001	0.191609	-10.9039	0.405532	1	-	NDUFB4P10	NADH:ubiquinone oxidoreductase subunit B4 pseudogene 10 [Source:HGNC Symbol;Acc:HGNC:45258]
ENSG00000259473	0.0001	0.191593	-10.9038	0.644512	1	-	LINC02205	long intergenic non-protein coding RNA 2205 [Source:HGNC Symbol;Acc:HGNC:53071]
ENSG00000160951	0.0001	0.191126	-10.9003	0.0905077	1	-	PTGER1	prostaglandin E receptor 1 [Source:HGNC Symbol;Acc:HGNC:9593]
ENSG00000250551	0.0001	0.191113	-10.9002	0.37867	1	-	MIR583HG	MIR583 host gene [Source:HGNC Symbol;Acc:HGNC:53061]
ENSG00000125726	0.0001	0.19064	-10.8966	0.323055	1	-	CD70	CD70 molecule [Source:HGNC Symbol;Acc:HGNC:11937]
ENSG00000251235	0.0001	0.190076	-10.8924	0.209124	1	-	SNRPCP2	small nuclear ribonucleoprotein polypeptide C pseudogene 2 [Source:HGNC Symbol;Acc:HGNC:49817]
ENSG00000253420	0.0001	0.189009	-10.8842	0.385951	1	-	AC103853.1	-
ENSG00000251630	0.0001	0.188269	-10.8786	0.63951	1	-	AC119751.6	-
ENSG00000221669	0.0001	0.188243	-10.8784	0.40196	1	-	MIR548N	microRNA 548n [Source:HGNC Symbol;Acc:HGNC:35330]
ENSG00000223113	0.0001	0.187979	-10.8764	0.812184	1	-	RNA5SP247	RNA, 5S ribosomal pseudogene 247 [Source:HGNC Symbol;Acc:HGNC:43147]
ENSG00000237049	0.0001	0.187716	-10.8743	0.403093	1	-	RPL34P1	ribosomal protein L34 pseudogene 1 [Source:HGNC Symbol;Acc:HGNC:10341]
ENSG00000267015	0.0001	0.187564	-10.8732	0.416835	1	-	AC023090.1	-
ENSG00000276520	0.0001	0.187326	-10.8713	0.471148	1	-	CR589904.2	-
ENSG00000203650	0.0001	0.186956	-10.8685	0.00768092	1	-	LINC01285	long intergenic non-protein coding RNA 1285 [Source:HGNC Symbol;Acc:HGNC:50344]
ENSG00000130812	0.0001	0.186204	-10.8627	0.00478225	1	-	ANGPTL6	angiopoietin like 6 [Source:HGNC Symbol;Acc:HGNC:23140]
ENSG00000253369	0.0001	0.185976	-10.8609	0.340029	1	-	AC131902.1	-
ENSG00000279499	0.0001	0.185318	-10.8558	0.471148	1	-	AL157770.1	-
ENSG00000207438	0.0001	0.185141	-10.8544	0.812184	1	-	Y_RNA	Y RNA [Source:RFAM;Acc:RF00019]
ENSG00000283423	0.0001	0.18475	-10.8514	0.32237	1	-	AC109462.4	-
ENSG00000200437	0.0001	0.184063	-10.846	0.646348	1	-	RNU6-799P	RNA, U6 small nuclear 799, pseudogene [Source:HGNC Symbol;Acc:HGNC:47762]
ENSG00000277882	0.0001	0.181175	-10.8232	0.63951	1	-	AL592295.2	-
ENSG00000274716	0.0001	0.181164	-10.8231	0.646348	1	-	U4	U4 spliceosomal RNA [Source:RFAM;Acc:RF00015]
ENSG00000263620	0.0001	0.181098	-10.8226	0.471148	1	-	AC129492.3	-
ENSG00000230730	0.0001	0.181026	-10.822	0.32237	1	-	AC074011.1	-
ENSG00000238419	0.0001	0.181017	-10.8219	0.812184	1	-	RNU7-186P	RNA, U7 small nuclear 186 pseudogene [Source:HGNC Symbol;Acc:HGNC:45720]
ENSG00000252050	0.0001	0.180948	-10.8214	0.646348	1	-	SNORA31	Small nucleolar RNA SNORA31 [Source:RFAM;Acc:RF00322]
ENSG00000244708	0.0001	0.180273	-10.816	0.47456	1	-	RPL23P10	ribosomal protein L23 pseudogene 10 [Source:HGNC Symbol;Acc:HGNC:36177]
ENSG00000260370	0.0001	0.1801	-10.8146	0.523293	1	-	AC215217.1	-
ENSG00000273167	0.0001	0.179993	-10.8137	0.0539728	1	-	AL359736.1	-
ENSG00000254981	0.0001	0.179983	-10.8136	0.516978	1	-	AC087623.1	-
ENSG00000266340	0.0001	0.179944	-10.8133	0.124593	1	-	AC138207.7	-
ENSG00000220867	0.0001	0.179503	-10.8098	0.517613	1	-	HSPE1P26	heat shock protein family E (Hsp10) member 1 pseudogene 26 [Source:HGNC Symbol;Acc:HGNC:49345]
ENSG00000268288	0.0001	0.179327	-10.8084	0.198534	1	-	AL589765.5	-
ENSG00000271128	0.0001	0.17844	-10.8012	0.648195	1	-	AC008608.1	-
ENSG00000283926	0.0001	0.177961	-10.7973	0.646348	1	-	MIR192	microRNA 192 [Source:HGNC Symbol;Acc:HGNC:31562]
ENSG00000235670	0.0001	0.177601	-10.7944	0.471148	1	-	RPL21P40	ribosomal protein L21 pseudogene 40 [Source:HGNC Symbol;Acc:HGNC:36189]
ENSG00000254847	0.0001	0.177559	-10.7941	0.466529	1	-	AC009806.1	-
ENSG00000207145	0.00870467	15.4395	-10.7926	1	1	-	SNORA18	small nucleolar RNA, H/ACA box 18 [Source:HGNC Symbol;Acc:HGNC:32608]
ENSG00000271163	0.0001	0.176736	-10.7874	0.540009	1	-	AC004840.2	-
ENSG00000139656	0.0001	0.176578	-10.7861	0.644512	1	-	SMIM2	small integral membrane protein 2 [Source:HGNC Symbol;Acc:HGNC:28776]
ENSG00000243267	0.0001	0.176396	-10.7846	0.520961	1	-	RN7SL614P	RNA, 7SL, cytoplasmic 614, pseudogene [Source:HGNC Symbol;Acc:HGNC:46630]
ENSG00000239799	0.0001	0.17614	-10.7825	0.535162	1	-	ITIH4-AS1	ITIH4 antisense RNA 1 [Source:HGNC Symbol;Acc:HGNC:40310]
ENSG00000260934	0.0001	0.175861	-10.7802	0.321126	1	-	AC130456.5	-
ENSG00000207863	0.0001	0.175776	-10.7795	0.812184	1	-	MIR125B2	microRNA 125b-2 [Source:HGNC Symbol;Acc:HGNC:31507]
ENSG00000263305	0.0001	0.175232	-10.7751	0.523293	1	-	AP005530.2	-
ENSG00000199349	0.0001	0.174248	-10.7669	0.812184	1	-	Y_RNA	Y RNA [Source:RFAM;Acc:RF00019]
ENSG00000270828	0.0001	0.174109	-10.7658	0.644512	1	-	AL023806.2	-
ENSG00000227431	0.0001	0.172912	-10.7558	0.40894	1	-	CSE1L-AS1	CSE1L antisense RNA 1 [Source:HGNC Symbol;Acc:HGNC:51232]
ENSG00000270911	0.0001	0.172673	-10.7538	0.635209	1	-	AC114878.2	-
ENSG00000171357	0.0001	0.172218	-10.75	0.0745806	1	-	LURAP1	leucine rich adaptor protein 1 [Source:HGNC Symbol;Acc:HGNC:32327]
ENSG00000258717	0.0001	0.171772	-10.7463	0.265456	1	-	AL132711.1	-
ENSG00000225704	0.0001	0.171715	-10.7458	0.644512	1	-	AL031274.1	-
ENSG00000283679	0.0001	0.171546	-10.7444	0.233604	1	-	AC025278.3	-
ENSG00000201157	0.0001	0.17154	-10.7443	0.63951	1	-	SNORA62	Small nucleolar RNA SNORA62/SNORA6 family [Source:RFAM;Acc:RF00091]
ENSG00000264924	0.0001	0.171295	-10.7423	0.47456	1	-	AC090772.1	-
ENSG00000272707	0.0001	0.1712	-10.7415	0.523293	1	-	AC046143.2	-
ENSG00000224447	0.0001	0.170464	-10.7353	0.648195	1	-	U91328.1	-
ENSG00000223446	0.0001	0.170164	-10.7327	0.648195	1	-	AL451065.1	-
ENSG00000233893	0.0001	0.169867	-10.7302	0.63951	1	-	EZR-AS1	EZR antisense RNA 1 [Source:HGNC Symbol;Acc:HGNC:40609]
ENSG00000199530	0.0001	0.169595	-10.7279	0.812184	1	-	Y_RNA	Y RNA [Source:RFAM;Acc:RF00019]
ENSG00000283016	0.0001	0.169127	-10.7239	0.405532	1	-	AL139353.3	-
ENSG00000243438	0.0001	0.169024	-10.723	0.47456	1	-	LARP1BP2	La ribonucleoprotein domain family member 1B pseudogene 2 [Source:HGNC Symbol;Acc:HGNC:44084]
ENSG00000271150	0.0001	0.16889	-10.7219	0.63951	1	-	AC008745.1	-
ENSG00000276863	0.0001	0.168188	-10.7159	0.466529	1	-	AC124319.3	-
ENSG00000230287	0.0001	0.167302	-10.7082	0.517613	1	-	AL445928.1	-
ENSG00000204165	0.0001	0.166341	-10.6999	0.63951	1	-	CXorf65	chromosome X open reading frame 65 [Source:HGNC Symbol;Acc:HGNC:33713]
ENSG00000268049	0.0001	0.166194	-10.6987	0.0684487	1	-	AC012313.2	-
ENSG00000241479	0.0001	0.165856	-10.6957	0.327637	1	-	AC074033.2	-
ENSG00000276957	0.0001	0.165558	-10.6931	0.405532	1	-	AL158063.1	-
ENSG00000240573	0.0001	0.165309	-10.691	0.471148	1	-	AC117462.1	-
ENSG00000253944	0.0001	0.165093	-10.6891	0.466529	1	-	AC027117.2	-
ENSG00000223437	0.0001	0.164366	-10.6827	0.812184	1	-	TMSB4XP3	thymosin beta 4, X-linked pseudogene 3 [Source:HGNC Symbol;Acc:HGNC:38587]
ENSG00000229922	0.0001	0.163969	-10.6792	0.47456	1	-	AL591397.1	-
ENSG00000240305	0.0001	0.16331	-10.6734	0.230459	1	-	AC091152.1	-
ENSG00000254607	0.0001	0.16329	-10.6732	0.520961	1	-	AP001783.1	-
ENSG00000263924	0.0001	0.163053	-10.6711	0.523293	1	-	AC022960.1	-
ENSG00000212628	0.0001	0.162879	-10.6696	0.812184	1	-	RNA5SP241	RNA, 5S ribosomal pseudogene 241 [Source:HGNC Symbol;Acc:HGNC:43141]
ENSG00000180846	0.0001	0.162419	-10.6655	0.119361	1	-	CSNK1G2-AS1	CSNK1G2 antisense RNA 1 [Source:HGNC Symbol;Acc:HGNC:28604]
ENSG00000201898	0.0001	0.162054	-10.6623	0.812184	1	-	SNORA72	Small nucleolar RNA SNORA72 [Source:RFAM;Acc:RF00139]
ENSG00000212205	0.0001	0.161159	-10.6543	0.812184	1	-	Y_RNA	Y RNA [Source:RFAM;Acc:RF00019]
ENSG00000237848	0.0001	0.161115	-10.6539	0.644512	1	-	AL606489.2	-
ENSG00000241981	0.0001	0.160963	-10.6525	0.198534	1	-	AF213884.1	-
ENSG00000233470	0.0001	0.160669	-10.6499	0.644512	1	-	AL360175.1	-
ENSG00000224429	0.0001	0.160404	-10.6475	0.183672	1	-	LINC00539	long intergenic non-protein coding RNA 539 [Source:HGNC Symbol;Acc:HGNC:43672]
ENSG00000258695	0.0001	0.160023	-10.6441	0.405532	1	-	AC005225.3	-
ENSG00000272328	0.0001	0.160005	-10.6439	0.403093	1	-	AC007128.2	-
ENSG00000225303	0.0001	0.159916	-10.6431	0.540009	1	-	AL117341.1	-
ENSG00000260466	0.0001	0.159721	-10.6413	0.403093	1	-	AC126696.2	-
ENSG00000258177	0.0001	0.159705	-10.6412	0.47456	1	-	AC008149.1	-
ENSG00000235211	0.0001	0.15945	-10.6389	0.812184	1	-	TMSB10P2	thymosin beta 10 pseudogene 2 [Source:HGNC Symbol;Acc:HGNC:41950]
ENSG00000275989	0.0001	0.159419	-10.6386	0.812184	1	-	AL442128.1	-
ENSG00000180284	0.0001	0.159143	-10.6361	0.405532	1	-	AL049610.1	-
ENSG00000241739	0.0001	0.159021	-10.635	0.161173	1	-	AC010469.2	-
ENSG00000227938	0.0001	0.158928	-10.6342	0.382855	1	-	AC104695.1	-
ENSG00000234208	0.0001	0.158825	-10.6332	0.285306	1	-	AC005529.1	-
ENSG00000115008	0.0001	0.158668	-10.6318	0.0667901	1	-	IL1A	interleukin 1 alpha [Source:HGNC Symbol;Acc:HGNC:5991]
ENSG00000232352	0.0001	0.158585	-10.631	0.515319	1	-	SEMA3B-AS1	SEMA3B antisense RNA 1 (head to head) [Source:HGNC Symbol;Acc:HGNC:49096]
ENSG00000251520	0.0001	0.158509	-10.6303	0.411196	1	-	AL162431.3	-
ENSG00000239224	0.0001	0.158355	-10.6289	0.63951	1	-	RN7SL546P	RNA, 7SL, cytoplasmic 546, pseudogene [Source:HGNC Symbol;Acc:HGNC:46562]
ENSG00000250902	0.0001	0.158349	-10.6289	0.47456	1	-	SMAD1-AS1	SMAD1 antisense RNA 1 [Source:HGNC Symbol;Acc:HGNC:49379]
ENSG00000235579	0.0001	0.158059	-10.6263	0.644512	1	-	AC007283.2	-
ENSG00000127249	0.0001	0.157286	-10.6192	0.333578	1	-	ATP13A4	ATPase 13A4 [Source:HGNC Symbol;Acc:HGNC:25422]
ENSG00000283338	0.0001	0.157227	-10.6186	0.648195	1	-	AC090582.1	-
ENSG00000227407	0.0001	0.15631	-10.6102	0.471148	1	-	AC245884.1	-
ENSG00000235335	0.0001	0.156289	-10.61	0.264926	1	-	AC016723.1	-
ENSG00000272359	0.0001	0.155898	-10.6064	0.812184	1	-	RNU4-89P	RNA, U4 small nuclear 89, pseudogene [Source:HGNC Symbol;Acc:HGNC:47025]
ENSG00000199879	0.0001	0.155545	-10.6031	0.63951	1	-	RNU1-120P	RNA, U1 small nuclear 120, pseudogene [Source:HGNC Symbol;Acc:HGNC:48462]
ENSG00000199672	0.0001	0.155489	-10.6026	0.812184	1	-	RNU4-21P	RNA, U4 small nuclear 21, pseudogene [Source:HGNC Symbol;Acc:HGNC:46957]
ENSG00000250197	0.0001	0.155223	-10.6001	0.644512	1	-	HMGN1P15	high mobility group nucleosome binding domain 1 pseudogene 15 [Source:HGNC Symbol;Acc:HGNC:39359]
ENSG00000233707	0.0001	0.154512	-10.5935	0.40196	1	-	RPL22P11	ribosomal protein L22 pseudogene 11 [Source:HGNC Symbol;Acc:HGNC:35603]
ENSG00000234479	0.0001	0.154081	-10.5895	0.523293	1	-	AP1B1P1	adaptor related protein complex 1 beta 1 subunit pseudogene 1 [Source:HGNC Symbol;Acc:HGNC:297]
ENSG00000199075	0.0001	0.153588	-10.5849	0.812184	1	-	MIR26A1	microRNA 26a-1 [Source:HGNC Symbol;Acc:HGNC:31610]
ENSG00000252390	0.0001	0.153588	-10.5849	0.812184	1	-	RNU5F-4P	RNA, U5F small nuclear 4, pseudogene [Source:HGNC Symbol;Acc:HGNC:42516]
ENSG00000201075	0.0001	0.153588	-10.5849	0.812184	1	-	Y_RNA	Y RNA [Source:RFAM;Acc:RF00019]
ENSG00000264497	0.0001	0.153588	-10.5849	0.812184	1	-	AC090616.4	-
ENSG00000264047	0.0001	0.153464	-10.5837	0.648195	1	-	RN7SL455P	RNA, 7SL, cytoplasmic 455, pseudogene [Source:HGNC Symbol;Acc:HGNC:46471]
ENSG00000262759	0.0001	0.153326	-10.5824	0.63951	1	-	MRPS21P9	mitochondrial ribosomal protein S21 pseudogene 9 [Source:HGNC Symbol;Acc:HGNC:29756]
ENSG00000275158	0.0001	0.153285	-10.582	0.521603	1	-	AC244196.2	-
ENSG00000247911	0.0001	0.152954	-10.5789	0.648195	1	-	HMGN1P12	high mobility group nucleosome binding domain 1 pseudogene 12 [Source:HGNC Symbol;Acc:HGNC:39356]
ENSG00000281832	0.0001	0.15283	-10.5777	0.0519529	1	-	LINC00602	long intergenic non-protein coding RNA 602 [Source:HGNC Symbol;Acc:HGNC:43917]
ENSG00000271511	0.0001	0.152744	-10.5769	0.648195	1	-	AL161756.3	-
ENSG00000273979	0.0001	0.15268	-10.5763	0.648195	1	-	Metazoa_SRP	Metazoan signal recognition particle RNA [Source:RFAM;Acc:RF00017]
ENSG00000265291	0.0001	0.152636	-10.5759	0.812184	1	-	MIR4710	microRNA 4710 [Source:HGNC Symbol;Acc:HGNC:41727]
ENSG00000275238	0.0001	0.152636	-10.5759	0.812184	1	-	MIR4734	microRNA 4734 [Source:HGNC Symbol;Acc:HGNC:41572]
ENSG00000252796	0.0001	0.152636	-10.5759	0.812184	1	-	RNU7-11P	RNA, U7 small nuclear 11 pseudogene [Source:HGNC Symbol;Acc:HGNC:34107]
ENSG00000257927	0.0001	0.152636	-10.5759	0.644512	1	-	MRPS36P5	mitochondrial ribosomal protein S36 pseudogene 5 [Source:HGNC Symbol;Acc:HGNC:29775]
ENSG00000207401	0.0001	0.152636	-10.5759	0.812184	1	-	Y_RNA	Y RNA [Source:RFAM;Acc:RF00019]
ENSG00000200528	0.0001	0.152636	-10.5759	0.812184	1	-	RNU6-1331P	RNA, U6 small nuclear 1331, pseudogene [Source:HGNC Symbol;Acc:HGNC:48294]
ENSG00000236327	0.0001	0.152636	-10.5759	0.644512	1	-	AL831737.1	-
ENSG00000207320	0.0001	0.152636	-10.5759	0.812184	1	-	Y_RNA	Y RNA [Source:RFAM;Acc:RF00019]
ENSG00000272170	0.0001	0.152305	-10.5728	0.199448	1	-	AL355385.1	-
ENSG00000241216	0.0001	0.152129	-10.5711	0.644512	1	-	SNAPC5P1	small nuclear RNA activating complex polypeptide 5 pseudogene 1 [Source:HGNC Symbol;Acc:HGNC:38667]
ENSG00000231955	0.0001	0.151607	-10.5661	0.0995729	1	-	AC007383.3	-
ENSG00000124785	0.0001	0.151226	-10.5625	0.220508	1	-	NRN1	neuritin 1 [Source:HGNC Symbol;Acc:HGNC:17972]
ENSG00000225548	0.0001	0.15101	-10.5604	0.466529	1	-	LINC01980	long intergenic non-protein coding RNA 1980 [Source:HGNC Symbol;Acc:HGNC:52808]
ENSG00000233138	0.0001	0.150557	-10.5561	0.543585	1	-	AL023584.1	-
ENSG00000237382	0.0001	0.149919	-10.55	0.405532	1	-	AC127537.2	-
ENSG00000259970	0.0001	0.149856	-10.5494	0.418729	1	-	AC099668.1	-
ENSG00000243870	0.0001	0.149803	-10.5488	0.63951	1	-	RN7SL236P	RNA, 7SL, cytoplasmic 236, pseudogene [Source:HGNC Symbol;Acc:HGNC:46252]
ENSG00000228680	0.0001	0.149795	-10.5488	0.535162	1	-	AC004692.2	-
ENSG00000259910	0.0001	0.149624	-10.5471	0.466529	1	-	AC120498.1	-
ENSG00000126264	0.0001	0.149399	-10.545	0.471148	1	-	HCST	hematopoietic cell signal transducer [Source:HGNC Symbol;Acc:HGNC:16977]
ENSG00000259715	0.0001	0.149347	-10.5444	0.32237	1	-	AC022087.1	-
ENSG00000279206	0.0001	0.149166	-10.5427	0.40894	1	-	AC004943.3	-
ENSG00000228559	0.0001	0.149044	-10.5415	0.471148	1	-	AL033519.3	-
ENSG00000237980	0.0001	0.148988	-10.541	0.47456	1	-	AL590648.3	-
ENSG00000238049	0.0001	0.148388	-10.5352	0.648195	1	-	Z92846.1	-
ENSG00000231613	0.0001	0.148233	-10.5337	0.418729	1	-	AC099568.1	-
ENSG00000231333	0.0001	0.148147	-10.5328	0.515319	1	-	RPL34P6	ribosomal protein L34 pseudogene 6 [Source:HGNC Symbol;Acc:HGNC:35810]
ENSG00000281369	0.0001	0.148103	-10.5324	0.812184	1	-	AC093826.2	-
ENSG00000242118	0.0001	0.147881	-10.5302	0.63951	1	-	RN7SL201P	RNA, 7SL, cytoplasmic 201, pseudogene [Source:HGNC Symbol;Acc:HGNC:46217]
ENSG00000254477	0.0001	0.147601	-10.5275	0.265456	1	-	AP000640.1	-
ENSG00000280217	0.0001	0.147518	-10.5267	0.0119127	1	-	AC126564.1	-
ENSG00000236762	0.0001	0.147184	-10.5234	0.471148	1	-	RPL19P16	ribosomal protein L19 pseudogene 16 [Source:HGNC Symbol;Acc:HGNC:36596]
ENSG00000277310	0.0001	0.147099	-10.5226	0.535162	1	-	AC090246.1	-
ENSG00000270510	0.0001	0.146774	-10.5194	0.421228	1	-	AP000811.1	-
ENSG00000242941	0.0001	0.146725	-10.5189	0.403093	1	-	RPL12P7	ribosomal protein L12 pseudogene 7 [Source:HGNC Symbol;Acc:HGNC:19782]
ENSG00000232163	0.0001	0.146695	-10.5186	0.648195	1	-	RPLP1P13	ribosomal protein lateral stalk subunit P1 pseudogene 13 [Source:HGNC Symbol;Acc:HGNC:41973]
ENSG00000231906	0.0001	0.146328	-10.515	0.644512	1	-	AC016397.1	-
ENSG00000252802	0.0001	0.146206	-10.5138	0.812184	1	-	Y_RNA	Y RNA [Source:RFAM;Acc:RF00019]
ENSG00000238259	0.0001	0.146206	-10.5138	0.648195	1	-	AC067940.1	-
ENSG00000252750	0.0001	0.146206	-10.5138	0.812184	1	-	RNU7-70P	RNA, U7 small nuclear 70 pseudogene [Source:HGNC Symbol;Acc:HGNC:34166]
ENSG00000212389	0.0001	0.146206	-10.5138	0.812184	1	-	RNU6-1275P	RNA, U6 small nuclear 1275, pseudogene [Source:HGNC Symbol;Acc:HGNC:48238]
ENSG00000277435	0.0001	0.14608	-10.5125	0.332683	1	-	AC138649.2	-
ENSG00000224614	0.0001	0.145804	-10.5098	0.011257	1	-	TNK2-AS1	TNK2 antisense RNA 1 [Source:HGNC Symbol;Acc:HGNC:49093]
ENSG00000251604	0.0001	0.145787	-10.5096	0.421228	1	-	LINC01385	long intergenic non-protein coding RNA 1385 [Source:HGNC Symbol;Acc:HGNC:50657]
ENSG00000242757	0.0001	0.145781	-10.5096	0.540009	1	-	AL606462.1	-
ENSG00000101883	0.0001	0.145445	-10.5063	0.385951	1	-	RHOXF1	Rhox homeobox family member 1 [Source:HGNC Symbol;Acc:HGNC:29993]
ENSG00000212497	0.0001	0.145134	-10.5032	0.812184	1	-	RNA5SP465	RNA, 5S ribosomal pseudogene 465 [Source:HGNC Symbol;Acc:HGNC:43365]
ENSG00000238160	0.0001	0.144921	-10.5011	0.540009	1	-	AC116366.2	-
ENSG00000101222	0.0001	0.144874	-10.5006	0.0731499	1	-	SPEF1	sperm flagellar 1 [Source:HGNC Symbol;Acc:HGNC:15874]
ENSG00000284041	0.0001	0.144433	-10.4962	0.466529	1	-	AC073111.3	-
ENSG00000266076	0.0001	0.143887	-10.4907	0.250001	1	-	AC004805.1	-
ENSG00000238964	0.0001	0.143848	-10.4903	0.812184	1	-	RNU7-125P	RNA, U7 small nuclear 125 pseudogene [Source:HGNC Symbol;Acc:HGNC:45659]
ENSG00000265078	0.0001	0.143809	-10.4899	0.648195	1	-	RN7SL664P	RNA, 7SL, cytoplasmic 664, pseudogene [Source:HGNC Symbol;Acc:HGNC:46680]
ENSG00000253736	0.0001	0.143415	-10.486	0.543585	1	-	AC022217.3	-
ENSG00000250948	0.0001	0.143222	-10.484	0.648195	1	-	AC091180.4	-
ENSG00000201813	0.0001	0.14315	-10.4833	0.812184	1	-	RNU6-915P	RNA, U6 small nuclear 915, pseudogene [Source:HGNC Symbol;Acc:HGNC:47878]
ENSG00000233661	0.0001	0.142785	-10.4796	0.535162	1	-	SPIN4-AS1	SPIN4 antisense RNA 1 [Source:HGNC Symbol;Acc:HGNC:41177]
ENSG00000223542	0.0001	0.142533	-10.4771	0.405532	1	-	AL024497.1	-
ENSG00000202058	0.0001	0.142191	-10.4736	0.63951	1	-	RN7SKP80	RNA, 7SK small nuclear pseudogene 80 [Source:HGNC Symbol;Acc:HGNC:45804]
ENSG00000270154	0.0001	0.141989	-10.4716	0.322928	1	-	AC130352.1	-
ENSG00000222182	0.0001	0.141535	-10.4669	0.812184	1	-	RNA5SP156	RNA, 5S ribosomal pseudogene 156 [Source:HGNC Symbol;Acc:HGNC:43056]
ENSG00000266906	0.0001	0.141342	-10.465	0.63951	1	-	AC005357.1	-
ENSG00000256282	0.0001	0.141157	-10.4631	0.261704	1	-	AC112694.1	-
ENSG00000265745	0.0001	0.140855	-10.46	0.644512	1	-	RN7SL375P	RNA, 7SL, cytoplasmic 375, pseudogene [Source:HGNC Symbol;Acc:HGNC:46391]
ENSG00000236165	0.0001	0.140798	-10.4594	0.211009	1	-	PRADC1P1	protease associated domain containing 1 pseudogene 1 [Source:HGNC Symbol;Acc:HGNC:44534]
ENSG00000271596	0.0001	0.140751	-10.4589	0.648195	1	-	AC008121.1	-
ENSG00000255503	0.0001	0.140628	-10.4577	0.40894	1	-	AP001767.3	-
ENSG00000241652	0.0001	0.140616	-10.4575	0.63951	1	-	RN7SL253P	RNA, 7SL, cytoplasmic 253, pseudogene [Source:HGNC Symbol;Acc:HGNC:46269]
ENSG00000259783	0.0001	0.14056	-10.457	0.543585	1	-	LINC02259	long intergenic non-protein coding RNA 2259 [Source:HGNC Symbol;Acc:HGNC:53172]
ENSG00000266160	0.0001	0.140139	-10.4526	0.648195	1	-	RN7SL612P	RNA, 7SL, cytoplasmic 612, pseudogene [Source:HGNC Symbol;Acc:HGNC:46628]
ENSG00000261723	0.0001	0.139533	-10.4464	0.341316	1	-	AC008870.4	-
ENSG00000271398	0.0001	0.139277	-10.4437	0.523293	1	-	AL353622.2	-
ENSG00000234915	0.0001	0.138512	-10.4358	0.540009	1	-	AL360091.3	-
ENSG00000202502	0.0001	0.138285	-10.4334	0.812184	1	-	RNA5SP151	RNA, 5S ribosomal pseudogene 151 [Source:HGNC Symbol;Acc:HGNC:43051]
ENSG00000276436	0.0001	0.1381	-10.4315	0.520961	1	-	AL136301.1	-
ENSG00000232479	0.0001	0.138066	-10.4311	0.0596934	1	-	AC010900.1	-
ENSG00000262874	0.0001	0.138041	-10.4309	0.17978	1	-	C19orf84	chromosome 19 open reading frame 84 [Source:HGNC Symbol;Acc:HGNC:27112]
ENSG00000242602	0.0001	0.13793	-10.4297	0.648195	1	-	AC008953.1	-
ENSG00000274963	0.0001	0.137834	-10.4287	0.523293	1	-	RN7SL600P	RNA, 7SL, cytoplasmic 600, pseudogene [Source:HGNC Symbol;Acc:HGNC:46616]
ENSG00000223505	0.0001	0.137419	-10.4244	0.523293	1	-	AC114402.1	-
ENSG00000255533	0.0001	0.137319	-10.4233	0.644512	1	-	AC136475.6	-
ENSG00000227979	0.0001	0.137033	-10.4203	0.644512	1	-	AC002127.1	-
ENSG00000244630	0.0001	0.135877	-10.4081	0.644512	1	-	AC022493.1	-
ENSG00000257384	0.0001	0.135679	-10.406	0.63951	1	-	AC009779.1	-
ENSG00000265099	0.0001	0.135463	-10.4037	0.63951	1	-	AC090774.2	-
ENSG00000226979	0.0001	0.13517	-10.4006	0.14144	1	-	LTA	lymphotoxin alpha [Source:HGNC Symbol;Acc:HGNC:6709]
ENSG00000277299	0.0001	0.135082	-10.3996	0.466529	1	-	AC084876.1	-
ENSG00000224505	0.0001	0.13488	-10.3975	0.403093	1	-	AC138150.1	-
ENSG00000258872	0.0001	0.134527	-10.3937	0.0696052	1	-	FDPSP3	farnesyl diphosphate synthase pseudogene 3 [Source:HGNC Symbol;Acc:HGNC:3634]
ENSG00000264994	0.0001	0.133993	-10.3879	0.812184	1	-	SNORD92	small nucleolar RNA, C/D box 92 [Source:HGNC Symbol;Acc:HGNC:32754]
ENSG00000213111	0.0001	0.133899	-10.3869	0.644512	1	-	COX5BP2	cytochrome c oxidase subunit 5B pseudogene 2 [Source:HGNC Symbol;Acc:HGNC:2271]
ENSG00000249619	0.0001	0.133833	-10.3862	0.812184	1	-	HMGN1P13	high mobility group nucleosome binding domain 1 pseudogene 13 [Source:HGNC Symbol;Acc:HGNC:39357]
ENSG00000258918	0.0001	0.133623	-10.384	0.543585	1	-	AL355922.5	-
ENSG00000273406	0.0001	0.133512	-10.3828	0.515319	1	-	AC245008.1	-
ENSG00000258520	0.0001	0.133435	-10.3819	0.322928	1	-	AL359317.1	-
ENSG00000242893	0.0001	0.133407	-10.3816	0.648195	1	-	RN7SL413P	RNA, 7SL, cytoplasmic 413, pseudogene [Source:HGNC Symbol;Acc:HGNC:46429]
ENSG00000261701	0.0001	0.13305	-10.3778	0.47456	1	-	HPR	haptoglobin-related protein [Source:HGNC Symbol;Acc:HGNC:5156]
ENSG00000258096	0.0001	0.132948	-10.3766	0.416264	1	-	AC025031.2	-
ENSG00000253409	0.0001	0.132374	-10.3704	0.517613	1	-	TRBV7-4	T-cell receptor beta variable 7-4 (gene/pseudogene) [Source:HGNC Symbol;Acc:HGNC:12238]
ENSG00000214915	0.0001	0.132239	-10.3689	0.535162	1	-	BX546450.1	-
ENSG00000237786	0.0001	0.132114	-10.3676	0.648195	1	-	GFOD1-AS1	GFOD1 antisense RNA 1 [Source:HGNC Symbol;Acc:HGNC:40956]
ENSG00000241114	0.0001	0.132076	-10.3672	0.63951	1	-	AC008280.2	-
ENSG00000221028	0.0001	0.131903	-10.3653	0.812184	1	-	MIR1231	microRNA 1231 [Source:HGNC Symbol;Acc:HGNC:33921]
ENSG00000255487	0.0001	0.131796	-10.3641	0.648195	1	-	AC087362.2	-
ENSG00000222037	0.0001	0.131785	-10.364	0.63951	1	-	IGLC6	immunoglobulin lambda constant 6 (gene/pseudogene) [Source:HGNC Symbol;Acc:HGNC:5860]
ENSG00000267472	0.0001	0.131581	-10.3617	0.326714	1	-	AC005332.3	-
ENSG00000254438	0.0001	0.13143	-10.3601	0.403093	1	-	AC022240.1	-
ENSG00000260052	0.0001	0.130831	-10.3535	0.471148	1	-	AC023813.3	-
ENSG00000268182	0.0001	0.130747	-10.3526	0.210755	1	-	SMIM17	small integral membrane protein 17 [Source:HGNC Symbol;Acc:HGNC:27114]
ENSG00000248916	0.0001	0.130746	-10.3526	0.535162	1	-	NUP210P3	nucleoporin 210 pseudogene 3 [Source:HGNC Symbol;Acc:HGNC:42712]
ENSG00000205767	0.0001	0.130458	-10.3494	0.644512	1	-	AL136038.1	-
ENSG00000274269	0.0001	0.129898	-10.3432	0.47456	1	-	AL031665.1	-
ENSG00000253696	0.0001	0.12951	-10.3389	0.32237	1	-	KBTBD11-OT1	KBTBD11 overlapping transcript 1 [Source:HGNC Symbol;Acc:HGNC:49147]
ENSG00000273734	0.0001	0.129442	-10.3381	0.326881	1	-	AC005258.1	-
ENSG00000258892	0.0001	0.129228	-10.3357	0.63951	1	-	AL160236.2	-
ENSG00000256192	0.0001	0.128921	-10.3323	0.644512	1	-	AC012158.2	-
ENSG00000232853	0.0001	0.128675	-10.3295	0.644512	1	-	LUZP4P1	leucine zipper protein 4 pseudogene 1 [Source:HGNC Symbol;Acc:HGNC:44904]
ENSG00000109846	0.0001	0.128584	-10.3285	0.17898	1	-	CRYAB	crystallin alpha B [Source:HGNC Symbol;Acc:HGNC:2389]
ENSG00000187475	0.0001	0.128347	-10.3258	0.466529	1	-	HIST1H1T	histone cluster 1 H1 family member t [Source:HGNC Symbol;Acc:HGNC:4720]
ENSG00000260989	0.0001	0.12742	-10.3154	0.418729	1	-	AL133297.2	-
ENSG00000269480	0.0001	0.127291	-10.3139	0.471148	1	-	AC020913.2	-
ENSG00000236890	0.0001	0.127259	-10.3135	0.63951	1	-	AC016027.5	-
ENSG00000257826	0.0001	0.127128	-10.3121	0.385951	1	-	AL133304.2	-
ENSG00000259274	0.0001	0.12637	-10.3034	0.543585	1	-	AC107241.1	-
ENSG00000249928	0.0001	0.126056	-10.2998	0.648195	1	-	UQCRBP3	ubiquinol-cytochrome c reductase binding protein pseudogene 3 [Source:HGNC Symbol;Acc:HGNC:39033]
ENSG00000277999	0.0001	0.125877	-10.2978	0.285306	1	-	AC009093.6	-
ENSG00000237655	0.0001	0.125759	-10.2964	0.327637	1	-	AC073834.1	-
ENSG00000271272	0.0001	0.125111	-10.289	0.471148	1	-	AC068802.1	-
ENSG00000234093	0.0001	0.125005	-10.2878	0.520961	1	-	RPS15AP11	ribosomal protein S15a pseudogene 11 [Source:HGNC Symbol;Acc:HGNC:36707]
ENSG00000261065	0.0001	0.125002	-10.2877	0.403093	1	-	AL592146.2	-
ENSG00000119660	0.0001	0.124975	-10.2874	0.63951	1	-	DPPA5P4	developmental pluripotency associated 5 pseudogene 4 [Source:HGNC Symbol;Acc:HGNC:49665]
ENSG00000273011	0.0001	0.124899	-10.2865	0.40894	1	-	AC092681.3	-
ENSG00000256552	0.0001	0.124868	-10.2862	0.63951	1	-	AC092745.2	-
ENSG00000253880	0.0001	0.124838	-10.2858	0.466529	1	-	AC009435.1	-
ENSG00000254559	0.0001	0.124316	-10.2798	0.466529	1	-	AC069287.2	-
ENSG00000250315	0.0001	0.124195	-10.2784	0.63951	1	-	AC110760.3	-
ENSG00000261240	0.0001	0.124191	-10.2783	0.40894	1	-	AC009065.6	-
ENSG00000222320	0.0001	0.124106	-10.2774	0.812184	1	-	RNU6-1050P	RNA, U6 small nuclear 1050, pseudogene [Source:HGNC Symbol;Acc:HGNC:48013]
ENSG00000230020	0.0001	0.124073	-10.277	0.63951	1	-	NHS-AS1	NHS antisense RNA 1 [Source:HGNC Symbol;Acc:HGNC:40403]
ENSG00000261333	0.0001	0.123363	-10.2687	0.644512	1	-	CD24P2	CD24 molecule pseudogene 2 [Source:HGNC Symbol;Acc:HGNC:1647]
ENSG00000173389	0.0001	0.123283	-10.2678	0.466529	1	-	IQCF1	IQ motif containing F1 [Source:HGNC Symbol;Acc:HGNC:28607]
ENSG00000283749	0.0001	0.123275	-10.2677	0.812184	1	-	MIR4781	microRNA 4781 [Source:HGNC Symbol;Acc:HGNC:41769]
ENSG00000269966	0.0001	0.123198	-10.2668	0.340029	1	-	AL136164.2	-
ENSG00000240554	0.0001	0.123108	-10.2657	0.338533	1	-	AL135933.1	-
ENSG00000236866	0.0001	0.122872	-10.2629	0.540009	1	-	AL157902.1	-
ENSG00000227067	0.0001	0.122805	-10.2622	0.535162	1	-	DPPA3P1	developmental pluripotency associated 3 pseudogene 1 [Source:HGNC Symbol;Acc:HGNC:32345]
ENSG00000264125	0.0001	0.122759	-10.2616	0.471148	1	-	AC104984.1	-
ENSG00000202318	0.0001	0.122384	-10.2572	0.812184	1	-	Y_RNA	Y RNA [Source:RFAM;Acc:RF00019]
ENSG00000219249	0.0001	0.122311	-10.2563	0.382855	1	-	AMZ2P2	archaelysin family metallopeptidase 2 pseudogene 2 [Source:HGNC Symbol;Acc:HGNC:38072]
ENSG00000259242	0.0001	0.122028	-10.253	0.257407	1	-	AC002306.1	-
ENSG00000273389	0.0001	0.121865	-10.2511	0.543585	1	-	AC104059.1	-
ENSG00000254267	0.0001	0.121852	-10.2509	0.515319	1	-	AP003438.1	-
ENSG00000230162	0.0001	0.12176	-10.2498	0.37867	1	-	CT45A11P	cancer/testis antigen family 45 member A11, pseudogene [Source:HGNC Symbol;Acc:HGNC:51336]
ENSG00000251550	0.0001	0.121674	-10.2488	0.63951	1	-	AC091133.4	-
ENSG00000238188	0.0001	0.121475	-10.2464	0.47456	1	-	AL049733.1	-
ENSG00000254963	0.0001	0.121359	-10.2451	0.648195	1	-	AP001972.2	-
ENSG00000206923	0.0001	0.12118	-10.2429	0.812184	1	-	RNU6-432P	RNA, U6 small nuclear 432, pseudogene [Source:HGNC Symbol;Acc:HGNC:47395]
ENSG00000278035	0.0001	0.121021	-10.241	0.543585	1	-	AL121895.2	-
ENSG00000177112	0.0001	0.121011	-10.2409	0.336419	1	-	MRVI1-AS1	MRVI1 antisense RNA 1 [Source:HGNC Symbol;Acc:HGNC:43434]
ENSG00000241809	0.0001	0.120791	-10.2383	0.515319	1	-	AC022133.1	-
ENSG00000238825	0.0001	0.120601	-10.236	0.812184	1	-	RNU1-13P	RNA, U1 small nuclear 13, pseudogene [Source:HGNC Symbol;Acc:HGNC:10138]
ENSG00000271482	0.0001	0.120339	-10.2329	0.648195	1	-	AC005070.2	-
ENSG00000273442	0.0001	0.12027	-10.2321	0.466529	1	-	AC006946.3	-
ENSG00000223298	0.0001	0.119518	-10.223	0.812184	1	-	RNY3P8	RNA, Ro-associated Y3 pseudogene 8 [Source:HGNC Symbol;Acc:HGNC:42492]
ENSG00000270781	0.0001	0.119491	-10.2227	0.648195	1	-	AC091133.5	-
ENSG00000224649	0.0001	0.11927	-10.22	0.648195	1	-	AF124730.1	-
ENSG00000260141	0.0001	0.119192	-10.2191	0.133008	1	-	AC145350.2	-
ENSG00000238231	0.0001	0.119116	-10.2182	0.648195	1	-	AL512288.2	-
ENSG00000272814	0.0001	0.118992	-10.2167	0.648195	1	-	AC093732.2	-
ENSG00000236261	0.0001	0.118628	-10.2122	0.648195	1	-	AC064862.4	-
ENSG00000200389	0.0001	0.1184	-10.2094	0.812184	1	-	RNU6-509P	RNA, U6 small nuclear 509, pseudogene [Source:HGNC Symbol;Acc:HGNC:47472]
ENSG00000163263	0.0001	0.118322	-10.2085	0.644512	1	-	C1orf189	chromosome 1 open reading frame 189 [Source:HGNC Symbol;Acc:HGNC:32305]
ENSG00000223271	0.0001	0.118263	-10.2078	0.812184	1	-	Y_RNA	Y RNA [Source:RFAM;Acc:RF00019]
ENSG00000230807	0.0001	0.118226	-10.2073	0.648195	1	-	AC099535.1	-
ENSG00000283411	0.0001	0.117851	-10.2027	0.63951	1	-	AL590627.2	-
ENSG00000226045	0.0001	0.117755	-10.2016	0.648195	1	-	AC234644.1	-
ENSG00000186105	0.0001	0.117728	-10.2012	0.0207232	1	-	LRRC70	leucine rich repeat containing 70 [Source:HGNC Symbol;Acc:HGNC:35155]
ENSG00000261673	0.0001	0.117112	-10.1937	0.644512	1	-	AC009075.1	-
ENSG00000255250	0.0001	0.117094	-10.1935	0.521603	1	-	AP003059.2	-
ENSG00000204659	0.0001	0.116664	-10.1881	0.471148	1	-	CBY3	chibby family member 3 [Source:HGNC Symbol;Acc:HGNC:33278]
ENSG00000230912	0.0001	0.11641	-10.185	0.540009	1	-	AL021707.4	-
ENSG00000223739	0.0001	0.116157	-10.1819	0.643821	1	-	AC007389.2	-
ENSG00000251008	0.0001	0.115872	-10.1783	0.63951	1	-	ORAOV1P1	oral cancer overexpressed 1 pseudogene 1 [Source:HGNC Symbol;Acc:HGNC:39203]
ENSG00000254309	0.0001	0.115533	-10.1741	0.648195	1	-	AC124290.2	-
ENSG00000270876	0.0001	0.115327	-10.1715	0.47456	1	-	ZNF30-AS1	ZNF30 antisense RNA 1 [Source:HGNC Symbol;Acc:HGNC:51179]
ENSG00000238288	0.0001	0.115246	-10.1705	0.644512	1	-	MTND3P23	mitochondrially encoded NADH:ubiquinone oxidoreductase core subunit 3 pseudogene 23 [Source:HGNC Symbol;Acc:HGNC:52169]
ENSG00000271426	0.0001	0.115239	-10.1704	0.286339	1	-	AL109983.1	-
ENSG00000278475	0.0001	0.114842	-10.1654	0.515319	1	-	AC009464.1	-
ENSG00000259618	0.0001	0.114657	-10.1631	0.648195	1	-	AC012170.3	-
ENSG00000225854	0.0001	0.114514	-10.1613	0.648195	1	-	AL451139.1	-
ENSG00000224815	0.0001	0.114298	-10.1586	0.63951	1	-	AL691447.1	-
ENSG00000236546	0.0001	0.114207	-10.1574	0.40894	1	-	AL033527.2	-
ENSG00000207325	0.0001	0.114145	-10.1567	0.812184	1	-	RNY1P4	RNA, Ro-associated Y1 pseudogene 4 [Source:HGNC Symbol;Acc:HGNC:42481]
ENSG00000242017	0.0001	0.113988	-10.1547	0.199448	1	-	ALG1L15P	asparagine-linked glycosylation 1-like 15, pseudogene [Source:HGNC Symbol;Acc:HGNC:44384]
ENSG00000273176	0.0001	0.113927	-10.1539	0.648195	1	-	AL008635.1	-
ENSG00000268849	0.0001	0.113865	-10.1531	0.40894	1	-	SIGLEC22P	sialic acid binding Ig like lectin 22, pseudogene [Source:HGNC Symbol;Acc:HGNC:15611]
ENSG00000202184	0.0001	0.113386	-10.147	0.812184	1	-	RNU6-1283P	RNA, U6 small nuclear 1283, pseudogene [Source:HGNC Symbol;Acc:HGNC:48246]
ENSG00000215771	0.0001	0.113294	-10.1459	0.543585	1	-	LRRC37A14P	leucine rich repeat containing 37 member A14, pseudogene [Source:HGNC Symbol;Acc:HGNC:43818]
ENSG00000201048	0.0001	0.113277	-10.1456	0.812184	1	-	Y_RNA	Y RNA [Source:RFAM;Acc:RF00019]
ENSG00000235578	0.0001	0.112937	-10.1413	0.540009	1	-	AC007731.3	-
ENSG00000230385	0.0001	0.112931	-10.1412	0.535162	1	-	AC012507.1	-
ENSG00000252797	0.0001	0.112805	-10.1396	0.648195	1	-	RN7SKP272	RNA, 7SK small nuclear pseudogene 272 [Source:HGNC Symbol;Acc:HGNC:45996]
ENSG00000232756	0.0001	0.112739	-10.1388	0.540009	1	-	AC004990.1	-
ENSG00000227257	0.0001	0.112736	-10.1387	0.63951	1	-	AL158827.1	-
ENSG00000227198	0.0001	0.112535	-10.1362	0.32237	1	-	C6orf47-AS1	C6orf47 antisense RNA 1 [Source:HGNC Symbol;Acc:HGNC:39767]
ENSG00000228792	0.0001	0.112466	-10.1353	0.543585	1	-	AL356310.1	-
ENSG00000235426	0.0001	0.112038	-10.1298	0.540009	1	-	AL133481.1	-
ENSG00000270541	0.0001	0.111915	-10.1282	0.523293	1	-	AC069545.1	-
ENSG00000254606	0.0001	0.111787	-10.1265	0.405532	1	-	AC013714.1	-
ENSG00000253302	0.0001	0.11151	-10.123	0.543585	1	-	STAU2-AS1	STAU2 antisense RNA 1 [Source:HGNC Symbol;Acc:HGNC:44101]
ENSG00000200506	0.0001	0.111427	-10.1219	0.812184	1	-	Y_RNA	Y RNA [Source:RFAM;Acc:RF00019]
ENSG00000249483	0.0001	0.111418	-10.1218	0.47456	1	-	AC026726.1	-
ENSG00000256351	0.0001	0.111387	-10.1214	0.644512	1	-	AC007834.2	-
ENSG00000259054	0.0001	0.111323	-10.1205	0.648195	1	-	LINC02332	long intergenic non-protein coding RNA 2332 [Source:HGNC Symbol;Acc:HGNC:53252]
ENSG00000171631	0.0001	0.111292	-10.1201	0.0205077	1	-	P2RY6	pyrimidinergic receptor P2Y6 [Source:HGNC Symbol;Acc:HGNC:8543]
ENSG00000260668	0.0001	0.110919	-10.1153	0.540009	1	-	AC093536.1	-
ENSG00000239472	0.0001	0.11081	-10.1139	0.644512	1	-	RN7SL221P	RNA, 7SL, cytoplasmic 221, pseudogene [Source:HGNC Symbol;Acc:HGNC:46237]
ENSG00000227211	0.0001	0.110336	-10.1077	0.63951	1	-	AL035551.1	-
ENSG00000200670	0.0001	0.110074	-10.1043	0.812184	1	-	RNU6-912P	RNA, U6 small nuclear 912, pseudogene [Source:HGNC Symbol;Acc:HGNC:47875]
ENSG00000178997	0.0001	0.109938	-10.1025	0.405532	1	-	EXD1	exonuclease 3'-5' domain containing 1 [Source:HGNC Symbol;Acc:HGNC:28507]
ENSG00000252569	0.0001	0.109706	-10.0994	0.812184	1	-	RNU6-1153P	RNA, U6 small nuclear 1153, pseudogene [Source:HGNC Symbol;Acc:HGNC:48116]
ENSG00000223807	0.0001	0.109654	-10.0987	0.648195	1	-	BOLA3P4	bolA family member 3 pseudogene 4 [Source:HGNC Symbol;Acc:HGNC:51443]
ENSG00000259200	0.0001	0.109464	-10.0962	0.471148	1	-	AC068722.1	-
ENSG00000243303	0.0001	0.109454	-10.0961	0.63951	1	-	AC103987.1	-
ENSG00000242696	0.0001	0.109128	-10.0918	0.63951	1	-	RN7SL40P	RNA, 7SL, cytoplasmic 40, pseudogene [Source:HGNC Symbol;Acc:HGNC:46056]
ENSG00000226991	0.0001	0.108702	-10.0862	0.644512	1	-	AC140479.1	-
ENSG00000213035	0.0001	0.108671	-10.0858	0.63951	1	-	RPL23AP80	ribosomal protein L23a pseudogene 80 [Source:HGNC Symbol;Acc:HGNC:36956]
ENSG00000248647	0.0001	0.108568	-10.0844	0.644512	1	-	AC012613.1	-
ENSG00000241499	0.0001	0.10849	-10.0834	0.648195	1	-	AL132838.2	-
ENSG00000200261	0.0001	0.108335	-10.0813	0.812184	1	-	Y_RNA	Y RNA [Source:RFAM;Acc:RF00019]
ENSG00000211835	0.0001	0.108322	-10.0811	0.812184	1	-	TRAJ56	T-cell receptor alpha joining 56 [Source:HGNC Symbol;Acc:HGNC:12088]
ENSG00000228825	0.0001	0.108271	-10.0804	0.648195	1	-	LAMTOR3P1	late endosomal/lysosomal adaptor, MAPK and MTOR activator 3 pseudogene 1 [Source:HGNC Symbol;Acc:HGNC:39726]
ENSG00000111404	0.0001	0.107838	-10.0746	0.385951	1	-	RERGL	RERG like [Source:HGNC Symbol;Acc:HGNC:26213]
ENSG00000206979	0.0001	0.107798	-10.0741	0.643821	1	-	SNORD61	small nucleolar RNA, C/D box 61 [Source:HGNC Symbol;Acc:HGNC:10218]
ENSG00000232362	0.0001	0.10776	-10.0736	0.643821	1	-	ATP5LP2	ATP synthase, H+ transporting, mitochondrial Fo complex subunit G pseudogene 2 [Source:HGNC Symbol;Acc:HGNC:13215]
ENSG00000200591	0.0001	0.107743	-10.0734	0.812184	1	-	Y_RNA	Y RNA [Source:RFAM;Acc:RF00019]
ENSG00000223450	0.0001	0.107636	-10.0719	0.63951	1	-	AL590632.1	-
ENSG00000265728	0.0001	0.107622	-10.0718	0.32237	1	-	AP001099.1	-
ENSG00000255760	0.0001	0.10749	-10.07	0.471148	1	-	LINC02422	long intergenic non-protein coding RNA 2422 [Source:HGNC Symbol;Acc:HGNC:53352]
ENSG00000272970	0.0001	0.107358	-10.0682	0.466529	1	-	AC107294.2	-
ENSG00000230736	0.0001	0.107203	-10.0661	0.183672	1	-	AL021937.1	-
ENSG00000243849	0.0001	0.107153	-10.0655	0.644512	1	-	CFAP44-AS1	CFAP44 antisense RNA 1 [Source:HGNC Symbol;Acc:HGNC:41113]
ENSG00000253796	0.0001	0.106964	-10.0629	0.543585	1	-	AC104248.1	-
ENSG00000273257	0.0001	0.106798	-10.0607	0.644512	1	-	AC069200.1	-
ENSG00000213303	0.0001	0.106768	-10.0603	0.644512	1	-	AC008481.1	-
ENSG00000178026	0.0001	0.10676	-10.0602	0.305967	1	-	LRRC75B	leucine rich repeat containing 75B [Source:HGNC Symbol;Acc:HGNC:33155]
ENSG00000267124	0.0001	0.106736	-10.0598	0.540009	1	-	AC016588.1	-
ENSG00000222259	0.0001	0.106246	-10.0532	0.63951	1	-	RN7SKP114	RNA, 7SK small nuclear pseudogene 114 [Source:HGNC Symbol;Acc:HGNC:45838]
ENSG00000279122	0.0001	0.106072	-10.0508	0.133008	1	-	AC020763.2	-
ENSG00000275213	0.0001	0.105923	-10.0488	0.63951	1	-	Metazoa_SRP	Metazoan signal recognition particle RNA [Source:RFAM;Acc:RF00017]
ENSG00000246662	0.0001	0.105634	-10.0449	0.0286403	1	-	LINC00535	long intergenic non-protein coding RNA 535 [Source:HGNC Symbol;Acc:HGNC:43644]
ENSG00000267132	0.0001	0.105566	-10.0439	0.540009	1	-	AC067852.3	-
ENSG00000225039	0.0001	0.105542	-10.0436	0.543585	1	-	LINC01058	long intergenic non-protein coding RNA 1058 [Source:HGNC Symbol;Acc:HGNC:49061]
ENSG00000284376	0.0001	0.105495	-10.043	0.63951	1	-	AC092017.4	-
ENSG00000278388	0.0001	0.10546	-10.0425	0.812184	1	-	AC002076.2	-
ENSG00000255362	0.0001	0.105186	-10.0387	0.63951	1	-	AP000785.2	-
ENSG00000240405	0.0001	0.10485	-10.0341	0.421228	1	-	SAMMSON	survival associated mitochondrial melanoma specific oncogenic non-coding RNA [Source:HGNC Symbol;Acc:HGNC:49644]
ENSG00000279000	0.0001	0.10472	-10.0323	0.336419	1	-	OR10A6	olfactory receptor family 10 subfamily A member 6 (gene/pseudogene) [Source:HGNC Symbol;Acc:HGNC:15132]
ENSG00000257004	0.0001	0.104698	-10.032	0.63951	1	-	AC008115.2	-
ENSG00000233041	0.0001	0.104611	-10.0308	0.540009	1	-	PHGR1	proline, histidine and glycine rich 1 [Source:HGNC Symbol;Acc:HGNC:37226]
ENSG00000276362	0.0001	0.104545	-10.0299	0.644512	1	-	AC010087.1	-
ENSG00000242551	0.0001	0.104478	-10.029	0.265456	1	-	POU5F1P6	POU class 5 homeobox 1 pseudogene 6 [Source:HGNC Symbol;Acc:HGNC:33312]
ENSG00000270722	0.0001	0.104239	-10.0257	0.812184	1	-	U1	U1 spliceosomal RNA [Source:RFAM;Acc:RF00003]
ENSG00000135702	0.0001	0.104095	-10.0237	0.00547459	1	-	CHST5	carbohydrate sulfotransferase 5 [Source:HGNC Symbol;Acc:HGNC:1973]
ENSG00000279864	0.0001	0.104044	-10.023	0.812184	1	-	AC124864.2	-
ENSG00000255369	0.0001	0.103828	-10.02	0.644512	1	-	AP000920.1	-
ENSG00000267375	0.0001	0.1038	-10.0196	0.63951	1	-	AC008649.2	-
ENSG00000228860	0.0001	0.103588	-10.0166	0.644512	1	-	AL731547.1	-
ENSG00000233321	0.0001	0.103514	-10.0156	0.471148	1	-	AL357833.1	-
ENSG00000202522	0.0001	0.103509	-10.0155	0.812184	1	-	Y_RNA	Y RNA [Source:RFAM;Acc:RF00019]
ENSG00000273342	0.0001	0.103488	-10.0152	0.644512	1	-	AP000553.2	-
ENSG00000242850	0.0001	0.1029	-10.007	0.644512	1	-	RPL23AP68	ribosomal protein L23a pseudogene 68 [Source:HGNC Symbol;Acc:HGNC:35489]
ENSG00000244619	0.0001	0.102879	-10.0067	0.644512	1	-	AC243547.1	-
ENSG00000226281	0.0001	0.102735	-10.0047	0.540009	1	-	AL031123.1	-
ENSG00000267498	0.0001	0.102676	-10.0039	0.644512	1	-	AC007786.1	-
ENSG00000247925	0.0001	0.102593	-10.0027	0.466529	1	-	AL139807.1	-
ENSG00000272442	0.0001	0.102188	-9.99701	0.0460892	1	-	AL353588.1	-
ENSG00000213777	0.0001	0.101666	-9.98962	0.403093	1	-	AC011487.1	-
ENSG00000168530	0.0001	0.101581	-9.98841	0.424476	1	-	MYL1	myosin light chain 1 [Source:HGNC Symbol;Acc:HGNC:7582]
ENSG00000152760	0.0001	0.10157	-9.98825	0.648195	1	-	TCTEX1D1	Tctex1 domain containing 1 [Source:HGNC Symbol;Acc:HGNC:26882]
ENSG00000229511	0.0001	0.101427	-9.98623	0.183672	1	-	GAS2L1P1	growth arrest specific 2 like 1 pseudogene 1 [Source:HGNC Symbol;Acc:HGNC:50293]
ENSG00000280354	0.0001	0.101012	-9.98032	0.63951	1	-	AC073592.9	-
ENSG00000237664	0.0001	0.100639	-9.97497	0.644512	1	-	LINC00316	long intergenic non-protein coding RNA 316 [Source:HGNC Symbol;Acc:HGNC:19723]
ENSG00000270727	0.0001	0.100372	-9.97114	0.648195	1	-	AL590032.1	-
ENSG00000251271	0.0001	0.100308	-9.97023	0.466529	1	-	ALG1L7P	asparagine-linked glycosylation 1-like 7, pseudogene [Source:HGNC Symbol;Acc:HGNC:44376]
ENSG00000224397	0.0001	0.100083	-9.96698	0.123243	1	-	SMIM25	small integral membrane protein 25 [Source:HGNC Symbol;Acc:HGNC:50328]
ENSG00000166492	0.0001	0.100013	-9.96597	0.416835	1	-	FAM86GP	family with sequence similarity 86 member G, pseudogene [Source:HGNC Symbol;Acc:HGNC:42358]
ENSG00000199150	0.0001	0.09994	-9.96492	0.812184	1	-	MIRLET7G	microRNA let-7g [Source:HGNC Symbol;Acc:HGNC:31485]
ENSG00000238150	0.0001	0.0998757	-9.96399	0.40196	1	-	AC008753.1	-
ENSG00000227479	0.0001	0.0998203	-9.96319	0.63951	1	-	AC124861.1	-
ENSG00000271763	0.0001	0.0997223	-9.96177	0.644512	1	-	AC091544.6	-
ENSG00000224805	0.0001	0.099535	-9.95906	0.543585	1	-	LINC00853	long intergenic non-protein coding RNA 853 [Source:HGNC Symbol;Acc:HGNC:43716]
ENSG00000230695	0.0001	0.0991077	-9.95285	0.812184	1	-	AC012462.3	-
ENSG00000213013	0.0001	0.0990933	-9.95264	0.644512	1	-	RPS15AP36	ribosomal protein S15a pseudogene 36 [Source:HGNC Symbol;Acc:HGNC:36803]
ENSG00000259899	0.0001	0.0990183	-9.95155	0.535162	1	-	AC010333.2	-
ENSG00000270995	0.0001	0.0988767	-9.94949	0.63951	1	-	AL137072.1	-
ENSG00000253133	0.0001	0.0988027	-9.94841	0.516978	1	-	AC009630.1	-
ENSG00000259637	0.0001	0.0981623	-9.93903	0.644512	1	-	DNM1P38	dynamin 1 pseudogene 38 [Source:HGNC Symbol;Acc:HGNC:35188]
ENSG00000226247	0.0001	0.098031	-9.93709	0.646348	1	-	SUPT4H1P1	SPT4 homolog, DSIF elongation factor subunit pseudogene [Source:HGNC Symbol;Acc:HGNC:33981]
ENSG00000277718	0.0001	0.0978507	-9.93444	0.812184	1	-	LINC02255	long intergenic non-protein coding RNA 2255 [Source:HGNC Symbol;Acc:HGNC:53153]
ENSG00000214067	0.0001	0.0978433	-9.93433	0.644512	1	-	AL360182.1	-
ENSG00000207622	0.0001	0.097738	-9.93278	0.812184	1	-	MIR619	microRNA 619 [Source:HGNC Symbol;Acc:HGNC:32875]
ENSG00000200114	0.0001	0.0976557	-9.93156	0.646348	1	-	RNA5SP123	RNA, 5S ribosomal pseudogene 123 [Source:HGNC Symbol;Acc:HGNC:43023]
ENSG00000229522	0.0001	0.0974707	-9.92882	0.648195	1	-	LINC01523	long intergenic non-protein coding RNA 1523 [Source:HGNC Symbol;Acc:HGNC:51225]
ENSG00000224812	0.0001	0.0973357	-9.92682	0.00615308	1	-	TMEM72-AS1	TMEM72 antisense RNA 1 [Source:HGNC Symbol;Acc:HGNC:27349]
ENSG00000259088	0.0001	0.097253	-9.9256	0.648195	1	-	AL137779.2	-
ENSG00000265487	0.0001	0.097187	-9.92462	0.63951	1	-	AP001021.1	-
ENSG00000258648	0.0001	0.0968107	-9.91902	0.515319	1	-	UBE2CP1	ubiquitin conjugating enzyme E2 C pseudogene 1 [Source:HGNC Symbol;Acc:HGNC:19670]
ENSG00000253737	0.0001	0.096809	-9.919	0.644512	1	-	AP003469.3	-
ENSG00000230064	0.0001	0.0967993	-9.91885	0.63951	1	-	AL772161.1	-
ENSG00000233647	0.0001	0.0966253	-9.91626	0.644512	1	-	NENFP1	neudesin neurotrophic factor pseudogene 1 [Source:HGNC Symbol;Acc:HGNC:50298]
ENSG00000228280	0.0001	0.0966197	-9.91617	0.63951	1	-	AL731568.1	-
ENSG00000253121	0.0001	0.0966053	-9.91596	0.520961	1	-	AC120042.2	-
ENSG00000278960	0.0001	0.096429	-9.91332	0.63951	1	-	AL022329.3	-
ENSG00000224174	0.0001	0.096389	-9.91272	0.644512	1	-	AL137802.1	-
ENSG00000261731	0.0001	0.096293	-9.91129	0.644512	1	-	AC074050.3	-
ENSG00000177418	0.0001	0.0962827	-9.91113	0.644512	1	-	AC006001.1	-
ENSG00000200711	0.0001	0.096199	-9.90988	0.812184	1	-	RNA5SP28	RNA, 5S ribosomal pseudogene 28 [Source:HGNC Symbol;Acc:HGNC:42604]
ENSG00000235861	0.0001	0.0961813	-9.90961	0.812184	1	-	AC005237.2	-
ENSG00000249302	0.0001	0.0961407	-9.909	0.644512	1	-	FTH1P24	ferritin heavy chain 1 pseudogene 24 [Source:HGNC Symbol;Acc:HGNC:37642]
ENSG00000241400	0.0001	0.096135	-9.90892	0.644512	1	-	AC022215.1	-
ENSG00000200893	0.0001	0.09611	-9.90854	0.642001	1	-	RNU6-944P	RNA, U6 small nuclear 944, pseudogene [Source:HGNC Symbol;Acc:HGNC:47907]
ENSG00000244310	0.0001	0.0959927	-9.90678	0.63951	1	-	AC093904.3	-
ENSG00000231272	0.0001	0.0955287	-9.89979	0.644512	1	-	AL122008.1	-
ENSG00000224403	0.0001	0.0954727	-9.89894	0.517613	1	-	DPPA2P3	developmental pluripotency associated 2 pseudogene 3 [Source:HGNC Symbol;Acc:HGNC:44628]
ENSG00000233163	0.0001	0.0954023	-9.89788	0.648195	1	-	RPS12P17	ribosomal protein S12 pseudogene 17 [Source:HGNC Symbol;Acc:HGNC:35705]
ENSG00000268465	0.0001	0.095377	-9.8975	0.648195	1	-	AC008403.1	-
ENSG00000244229	0.0001	0.0953517	-9.89711	0.648195	1	-	AC027575.1	-
ENSG00000217783	0.0001	0.095341	-9.89695	0.340029	1	-	LDHAL6FP	lactate dehydrogenase A like 6F, pseudogene [Source:HGNC Symbol;Acc:HGNC:44240]
ENSG00000253921	0.0001	0.0953003	-9.89634	0.543585	1	-	AC091982.2	-
ENSG00000257405	0.0001	0.0951523	-9.8941	0.63951	1	-	AC079600.1	-
ENSG00000272966	0.0001	0.0951497	-9.89405	0.644512	1	-	AC064836.2	-
ENSG00000219790	0.0001	0.094698	-9.88719	0.648195	1	-	OSTCP6	oligosaccharyltransferase complex subunit pseudogene 6 [Source:HGNC Symbol;Acc:HGNC:42868]
ENSG00000256314	0.0001	0.0946847	-9.88699	0.644512	1	-	AC078962.3	-
ENSG00000254180	0.0001	0.0945977	-9.88566	0.535162	1	-	AB015752.1	-
ENSG00000264157	0.0001	0.094393	-9.88254	0.812184	1	-	MIR3127	microRNA 3127 [Source:HGNC Symbol;Acc:HGNC:38269]
ENSG00000280181	0.0001	0.0943853	-9.88242	0.421228	1	-	AC025262.2	-
ENSG00000229020	0.0001	0.094335	-9.88165	0.466529	1	-	AKR7A2P1	aldo-keto reductase family 7 member A2 pseudogene 1 [Source:HGNC Symbol;Acc:HGNC:24062]
ENSG00000254333	0.0001	0.0942653	-9.88058	0.648195	1	-	NDST1-AS1	NDST1 antisense RNA 1 [Source:HGNC Symbol;Acc:HGNC:52899]
ENSG00000225744	0.0001	0.0941653	-9.87905	0.466529	1	-	AC017002.2	-
ENSG00000213197	0.0001	0.0940497	-9.87728	0.413357	1	-	AC012066.1	-
ENSG00000244308	0.0001	0.094011	-9.87669	0.644512	1	-	RN7SL762P	RNA, 7SL, cytoplasmic 762, pseudogene [Source:HGNC Symbol;Acc:HGNC:46778]
ENSG00000271428	0.0001	0.0938333	-9.87396	0.644512	1	-	AL031281.1	-
ENSG00000237756	0.0001	0.093522	-9.86916	0.648195	1	-	AL592435.1	-
ENSG00000226036	0.0001	0.0934887	-9.86865	0.63951	1	-	AL590648.1	-
ENSG00000214465	0.0001	0.0933283	-9.86617	0.416835	1	-	SMARCE1P6	SWI/SNF related, matrix associated, actin dependent regulator of chromatin, subfamily e, member 1 pseudogene 6 [Source:HGNC Symbol;Acc:HGNC:39737]
ENSG00000185631	0.0001	0.0932633	-9.86517	0.63951	1	-	AC017079.1	-
ENSG00000253238	0.0001	0.093196	-9.86412	0.644512	1	-	AC104212.3	-
ENSG00000274656	0.0001	0.09284	-9.8586	0.644512	1	-	RN7SL625P	RNA, 7SL, cytoplasmic 625, pseudogene [Source:HGNC Symbol;Acc:HGNC:46641]
ENSG00000234567	0.0001	0.0926983	-9.8564	0.644512	1	-	AL024497.2	-
ENSG00000227267	0.0001	0.0926287	-9.85531	0.517613	1	-	AC072039.1	-
ENSG00000270966	0.0001	0.0925817	-9.85458	0.642001	1	-	AC087763.1	-
ENSG00000226338	0.0001	0.0925467	-9.85404	0.812184	1	-	AC079150.2	-
ENSG00000178287	0.0001	0.0921813	-9.84833	0.535162	1	-	SPAG11A	sperm associated antigen 11A [Source:HGNC Symbol;Acc:HGNC:33342]
ENSG00000199458	0.0001	0.0920143	-9.84571	0.812184	1	-	RNU4-35P	RNA, U4 small nuclear 35, pseudogene [Source:HGNC Symbol;Acc:HGNC:46971]
ENSG00000273487	0.0001	0.0919827	-9.84522	0.264926	1	-	AC104836.1	-
ENSG00000183432	0.0001	0.0916427	-9.83988	0.644512	1	-	ZBTB8OSP1	zinc finger and BTB domain containing 8 opposite strand pseudogene 1 [Source:HGNC Symbol;Acc:HGNC:19043]
ENSG00000188523	0.0001	0.0914733	-9.83721	0.264926	1	-	CFAP77	cilia and flagella associated protein 77 [Source:HGNC Symbol;Acc:HGNC:33776]
ENSG00000252461	0.0001	0.0913787	-9.83571	0.812184	1	-	SNORA43	Small nucleolar RNA SNORA43 [Source:RFAM;Acc:RF00416]
ENSG00000057593	0.0001	0.0912887	-9.83429	0.47456	1	-	F7	coagulation factor VII [Source:HGNC Symbol;Acc:HGNC:3544]
ENSG00000276958	0.0001	0.0912627	-9.83388	0.812184	1	-	AL590099.1	-
ENSG00000279549	0.000119	0.108299	-9.82984	0.0511421	1	-	AP000437.1	-
ENSG00000211747	0.0001	0.0908963	-9.82808	0.644512	1	-	TRBV20-1	T-cell receptor beta variable 20-1 [Source:HGNC Symbol;Acc:HGNC:12196]
ENSG00000249639	0.0001	0.0908543	-9.82741	0.644512	1	-	AC022092.1	-
ENSG00000175267	0.0001	0.0907687	-9.82605	0.00598697	1	-	VWA3A	von Willebrand factor A domain containing 3A [Source:HGNC Symbol;Acc:HGNC:27088]
ENSG00000177354	0.0001	0.0906947	-9.82487	0.644512	1	-	C10orf71	chromosome 10 open reading frame 71 [Source:HGNC Symbol;Acc:HGNC:26973]
ENSG00000227678	0.0001	0.090578	-9.82302	0.521603	1	-	AL355581.1	-
ENSG00000261000	0.0001	0.0905237	-9.82215	0.63951	1	-	AC244034.2	-
ENSG00000229749	0.0001	0.0904527	-9.82102	0.648195	1	-	COTL1P1	coactosin-like F-actin binding protein 1 pseudogene 1 [Source:HGNC Symbol;Acc:HGNC:2086]
ENSG00000110484	0.0001	0.0903723	-9.81974	0.644512	1	-	SCGB2A2	secretoglobin family 2A member 2 [Source:HGNC Symbol;Acc:HGNC:7050]
ENSG00000199102	0.0001	0.090346	-9.81932	0.812184	1	-	MIR302C	microRNA 302c [Source:HGNC Symbol;Acc:HGNC:31764]
ENSG00000245864	0.0001	0.089999	-9.81377	0.644512	1	-	MEF2C-AS2	MEF2C antisense RNA 2 [Source:HGNC Symbol;Acc:HGNC:53115]
ENSG00000170178	0.0001	0.0897473	-9.80973	0.261704	1	-	HOXD12	homeobox D12 [Source:HGNC Symbol;Acc:HGNC:5135]
ENSG00000274904	0.0001	0.0890997	-9.79928	0.540009	1	-	AC093512.1	-
ENSG00000258983	0.0001	0.089051	-9.79849	0.403093	1	-	AL162171.2	-
ENSG00000269993	0.0001	0.088968	-9.79714	0.648195	1	-	KC877982.1	-
ENSG00000139626	0.0001	0.08862	-9.79149	0.63951	1	-	ITGB7	integrin subunit beta 7 [Source:HGNC Symbol;Acc:HGNC:6162]
ENSG00000250961	0.0001	0.0885757	-9.79077	0.325095	1	-	AC025470.2	-
ENSG00000227373	0.0001	0.0884743	-9.78912	0.535162	1	-	AL121983.2	-
ENSG00000235131	0.0001	0.0884167	-9.78817	0.644512	1	-	AL136528.2	-
ENSG00000235631	0.0001	0.0883367	-9.78687	0.416835	1	-	RNF148	ring finger protein 148 [Source:HGNC Symbol;Acc:HGNC:22411]
ENSG00000273958	0.0001	0.0881187	-9.7833	0.63951	1	-	AC009560.1	-
ENSG00000225064	0.0001	0.0881003	-9.783	0.63951	1	-	LINC01802	long intergenic non-protein coding RNA 1802 [Source:HGNC Symbol;Acc:HGNC:52591]
ENSG00000272254	0.0001	0.0880187	-9.78167	0.644512	1	-	AC022893.3	-
ENSG00000277695	0.0001	0.087936	-9.78031	0.63951	1	-	AC097478.4	-
ENSG00000273982	0.0001	0.087798	-9.77804	0.648195	1	-	AC005746.3	-
ENSG00000283414	0.0001	0.0877237	-9.77682	0.812184	1	-	U6	U6 spliceosomal RNA [Source:RFAM;Acc:RF00026]
ENSG00000236510	0.0001	0.0876097	-9.77495	0.405532	1	-	AC011284.1	-
ENSG00000234523	0.0001	0.087592	-9.77466	0.812184	1	-	NDUFB1P2	NADH:ubiquinone oxidoreductase subunit B1 pseudogene 2 [Source:HGNC Symbol;Acc:HGNC:37815]
ENSG00000206743	0.0001	0.0875597	-9.77412	0.812184	1	-	RNU6-484P	RNA, U6 small nuclear 484, pseudogene [Source:HGNC Symbol;Acc:HGNC:47447]
ENSG00000266922	0.0001	0.087545	-9.77388	0.648195	1	-	AC008543.3	-
ENSG00000227773	0.0001	0.0874623	-9.77252	0.648195	1	-	ASH1L-IT1	ASH1L intronic transcript 1 [Source:HGNC Symbol;Acc:HGNC:41449]
ENSG00000230526	0.0001	0.0872203	-9.76852	0.644512	1	-	AC073370.1	-
ENSG00000144648	0.0001	0.0872163	-9.76845	0.0700704	1	-	ACKR2	atypical chemokine receptor 2 [Source:HGNC Symbol;Acc:HGNC:1565]
ENSG00000275791	0.0001	0.0871623	-9.76756	0.648195	1	-	TRBV10-3	T-cell receptor beta variable 10-3 [Source:HGNC Symbol;Acc:HGNC:12179]
ENSG00000255446	0.0001	0.087092	-9.7664	0.644512	1	-	AP003064.2	-
ENSG00000221866	0.0001	0.0870877	-9.76632	0.171033	1	-	PLXNA4	plexin A4 [Source:HGNC Symbol;Acc:HGNC:9102]
ENSG00000278200	0.0001	0.0869267	-9.76366	0.403093	1	-	LINC01971	long intergenic non-protein coding RNA 1971 [Source:HGNC Symbol;Acc:HGNC:52797]
ENSG00000235092	0.0001	0.0867773	-9.76117	0.521603	1	-	ID2-AS1	ID2 antisense RNA 1 (head to head) [Source:HGNC Symbol;Acc:HGNC:51103]
ENSG00000233069	0.0001	0.0867103	-9.76006	0.648195	1	-	AL663074.1	-
ENSG00000269345	0.0001	0.0867083	-9.76003	0.644512	1	-	VN1R85P	vomeronasal 1 receptor 85 pseudogene [Source:HGNC Symbol;Acc:HGNC:37405]
ENSG00000222267	0.0001	0.0863393	-9.75387	0.812184	1	-	RNU6-892P	RNA, U6 small nuclear 892, pseudogene [Source:HGNC Symbol;Acc:HGNC:47855]
ENSG00000213063	0.0001	0.0862693	-9.7527	0.523293	1	-	RPL29P7	ribosomal protein L29 pseudogene 7 [Source:HGNC Symbol;Acc:HGNC:36859]
ENSG00000187581	0.0001	0.0859113	-9.7467	0.644512	1	-	COX8C	cytochrome c oxidase subunit 8C [Source:HGNC Symbol;Acc:HGNC:24382]
ENSG00000226455	0.0001	0.085809	-9.74499	0.523293	1	-	AL121787.1	-
ENSG00000085563	0.0001	0.085485	-9.73953	0.63951	1	-	ABCB1	ATP binding cassette subfamily B member 1 [Source:HGNC Symbol;Acc:HGNC:40]
ENSG00000201680	0.0001	0.0852963	-9.73634	0.812184	1	-	Y_RNA	Y RNA [Source:RFAM;Acc:RF00019]
ENSG00000197585	0.0001	0.0850883	-9.73282	0.535162	1	-	AC068051.1	-
ENSG00000234946	0.0001	0.0849897	-9.73114	0.63951	1	-	SDHCP3	succinate dehydrogenase complex subunit C pseudogene 3 [Source:HGNC Symbol;Acc:HGNC:45178]
ENSG00000283858	0.0001	0.0849283	-9.7301	0.812184	1	-	MIR3674	microRNA 3674 [Source:HGNC Symbol;Acc:HGNC:38915]
ENSG00000200814	0.0001	0.084689	-9.72603	0.812184	1	-	RNU6-595P	RNA, U6 small nuclear 595, pseudogene [Source:HGNC Symbol;Acc:HGNC:47558]
ENSG00000271670	0.0001	0.0845447	-9.72357	0.535162	1	-	AC010998.2	-
ENSG00000234584	0.0001	0.084544	-9.72356	0.63951	1	-	AC019186.1	-
ENSG00000229348	0.0001	0.084544	-9.72356	0.63951	1	-	HYI-AS1	HYI antisense RNA 1 [Source:HGNC Symbol;Acc:HGNC:41173]
ENSG00000262188	0.0001	0.084515	-9.72306	0.644512	1	-	LINC01978	long intergenic non-protein coding RNA 1978 [Source:HGNC Symbol;Acc:HGNC:52806]
ENSG00000178596	0.0001	0.084447	-9.7219	0.405532	1	-	GAPDHP29	glyceraldehyde 3 phosphate dehydrogenase pseudogene 29 [Source:HGNC Symbol;Acc:HGNC:37781]
ENSG00000223309	0.0001	0.0843497	-9.72024	0.812184	1	-	RNU6-722P	RNA, U6 small nuclear 722, pseudogene [Source:HGNC Symbol;Acc:HGNC:47685]
ENSG00000253433	0.0001	0.0842303	-9.7182	0.648195	1	-	NCRNA00250	non-protein coding RNA 250 [Source:NCBI gene;Acc:552853]
ENSG00000172794	0.0001	0.0841213	-9.71633	0.266323	1	-	RAB37	RAB37, member RAS oncogene family [Source:HGNC Symbol;Acc:HGNC:30268]
ENSG00000205693	0.0001	0.0840757	-9.71554	0.466529	1	-	MANSC4	MANSC domain containing 4 [Source:HGNC Symbol;Acc:HGNC:40023]
ENSG00000234535	0.0001	0.0839043	-9.7126	0.63951	1	-	AL161719.1	-
ENSG00000213752	0.0001	0.0837607	-9.71013	0.648195	1	-	AL008718.1	-
ENSG00000169877	0.0001	0.0837057	-9.70918	0.648195	1	-	AHSP	alpha hemoglobin stabilizing protein [Source:HGNC Symbol;Acc:HGNC:18075]
ENSG00000266368	0.0001	0.083256	-9.70141	0.644512	1	-	AC005410.2	-
ENSG00000271236	0.0001	0.0831487	-9.69955	0.646348	1	-	SUMO2P15	SUMO2 pseudogene 15 [Source:HGNC Symbol;Acc:HGNC:49353]
ENSG00000225140	0.0001	0.0831297	-9.69922	0.37867	1	-	AL358216.1	-
ENSG00000241767	0.0001	0.0830843	-9.69843	0.63951	1	-	LINC01324	long intergenic non-protein coding RNA 1324 [Source:HGNC Symbol;Acc:HGNC:50530]
ENSG00000185467	0.0001	0.0828167	-9.69378	0.214426	1	-	KPNA7	karyopherin subunit alpha 7 [Source:HGNC Symbol;Acc:HGNC:21839]
ENSG00000224972	0.0001	0.082804	-9.69356	0.644512	1	-	AL513412.1	-
ENSG00000260403	0.0001	0.0827353	-9.69236	0.63951	1	-	AC120498.3	-
ENSG00000238324	0.0001	0.0826877	-9.69153	0.520961	1	-	RN7SKP198	RNA, 7SK small nuclear pseudogene 198 [Source:HGNC Symbol;Acc:HGNC:45922]
ENSG00000267078	0.0001	0.082677	-9.69134	0.37867	1	-	AC015802.1	-
ENSG00000181781	0.0001	0.0826483	-9.69084	0.260353	1	-	ODF3L2	outer dense fiber of sperm tails 3 like 2 [Source:HGNC Symbol;Acc:HGNC:26841]
ENSG00000213440	0.0001	0.0825313	-9.6888	0.644512	1	-	H2AFZP1	H2A histone family member Z pseudogene 1 [Source:HGNC Symbol;Acc:HGNC:4742]
ENSG00000138100	0.0001	0.0824947	-9.68816	0.18316	1	-	TRIM54	tripartite motif containing 54 [Source:HGNC Symbol;Acc:HGNC:16008]
ENSG00000217004	0.0001	0.082487	-9.68802	0.63951	1	-	Z97832.1	-
ENSG00000267298	0.0001	0.0824267	-9.68697	0.63951	1	-	AC006116.5	-
ENSG00000182000	0.0001	0.0821883	-9.68279	0.644512	1	-	AC117395.1	-
ENSG00000226744	0.0001	0.082018	-9.6798	0.812184	1	-	AC005326.1	-
ENSG00000221962	0.0001	0.0819993	-9.67947	0.648195	1	-	TMEM14EP	transmembrane protein 14E, pseudogene [Source:HGNC Symbol;Acc:HGNC:34386]
ENSG00000253504	0.0001	0.081478	-9.67027	0.471148	1	-	MTCYBP19	mitochondrially encoded cytochrome b pseudogene 19 [Source:HGNC Symbol;Acc:HGNC:51971]
ENSG00000283209	0.0001	0.081477	-9.67025	0.644512	1	-	AC106858.1	-
ENSG00000254231	0.0001	0.081407	-9.66901	0.63951	1	-	AC103760.1	-
ENSG00000278367	0.0001	0.0813273	-9.6676	0.63951	1	-	AL356652.1	-
ENSG00000232622	0.0001	0.0812113	-9.66554	0.812184	1	-	AC114482.1	-
ENSG00000253825	0.0001	0.0811113	-9.66376	0.648195	1	-	AC097173.3	-
ENSG00000282121	0.0001	0.0809023	-9.66004	0.63951	1	-	AL592430.2	-
ENSG00000269053	0.0001	0.0808643	-9.65936	0.644512	1	-	AC010319.3	-
ENSG00000278546	0.0001	0.080711	-9.65662	0.648195	1	-	AC003101.2	-
ENSG00000267654	0.0001	0.080708	-9.65657	0.63951	1	-	LINC01882	long intergenic non-protein coding RNA 1882 [Source:HGNC Symbol;Acc:HGNC:52701]
ENSG00000235051	0.0001	0.0806767	-9.65601	0.543585	1	-	AL357497.1	-
ENSG00000263797	0.0001	0.0806283	-9.65514	0.648195	1	-	AP005210.1	-
ENSG00000251675	0.0001	0.080554	-9.65381	0.543585	1	-	AC010260.1	-
ENSG00000249412	0.0001	0.0804757	-9.65241	0.644512	1	-	AC010285.2	-
ENSG00000253678	0.0001	0.0803403	-9.64998	0.523293	1	-	AC104964.1	-
ENSG00000255666	0.0001	0.0802727	-9.64877	0.63951	1	-	AP000943.2	-
ENSG00000273476	0.0001	0.0802223	-9.64786	0.63951	1	-	AL133215.3	-
ENSG00000227702	0.0001	0.080133	-9.64625	0.63951	1	-	LINC00111	long intergenic non-protein coding RNA 111 [Source:HGNC Symbol;Acc:HGNC:1262]
ENSG00000250532	0.0001	0.080097	-9.6456	0.63951	1	-	AC021180.1	-
ENSG00000248673	0.0001	0.08008	-9.6453	0.644512	1	-	LINC01331	long intergenic non-protein coding RNA 1331 [Source:HGNC Symbol;Acc:HGNC:50538]
ENSG00000265828	0.0001	0.0799437	-9.64284	0.643821	1	-	MIR3939	microRNA 3939 [Source:HGNC Symbol;Acc:HGNC:38931]
ENSG00000274128	0.0001	0.0799117	-9.64226	0.648195	1	-	AC027807.2	-
ENSG00000280176	0.0001	0.0798717	-9.64154	0.812184	1	-	AC012486.1	-
ENSG00000254370	0.0001	0.0798267	-9.64073	0.648195	1	-	AC025871.2	-
ENSG00000234070	0.0001	0.0797407	-9.63917	0.63951	1	-	SPATA17-AS1	SPATA17 antisense RNA 1 [Source:HGNC Symbol;Acc:HGNC:41086]
ENSG00000228809	0.0001	0.079688	-9.63822	0.47456	1	-	AL034428.1	-
ENSG00000266745	0.0001	0.0796623	-9.63775	0.642001	1	-	MIR3135A	microRNA 3135a [Source:HGNC Symbol;Acc:HGNC:38199]
ENSG00000253355	0.0001	0.079513	-9.63505	0.648195	1	-	AP003469.1	-
ENSG00000171136	0.0001	0.079442	-9.63376	0.63951	1	-	RLN3	relaxin 3 [Source:HGNC Symbol;Acc:HGNC:17135]
ENSG00000234183	0.0001	0.07941	-9.63318	0.812184	1	-	LINC01952	long intergenic non-protein coding RNA 1952 [Source:HGNC Symbol;Acc:HGNC:52775]
ENSG00000198580	0.0001	0.0793703	-9.63246	0.517613	1	-	AC073343.1	-
ENSG00000180919	0.0001	0.079365	-9.63236	0.471148	1	-	OR56B4	olfactory receptor family 56 subfamily B member 4 [Source:HGNC Symbol;Acc:HGNC:15248]
ENSG00000111783	0.0001	0.079316	-9.63147	0.385951	1	-	RFX4	regulatory factor X4 [Source:HGNC Symbol;Acc:HGNC:9985]
ENSG00000274331	0.0001	0.0792993	-9.63116	0.265456	1	-	AL355974.1	-
ENSG00000256995	0.0001	0.079263	-9.6305	0.535162	1	-	AC084816.1	-
ENSG00000238358	0.0001	0.0789587	-9.62495	0.644512	1	-	AC004969.1	-
ENSG00000212572	0.0001	0.0789077	-9.62402	0.812184	1	-	RNU6-903P	RNA, U6 small nuclear 903, pseudogene [Source:HGNC Symbol;Acc:HGNC:47866]
ENSG00000255382	0.0001	0.078676	-9.61978	0.648195	1	-	AP001646.3	-
ENSG00000225843	0.0001	0.0786747	-9.61976	0.40894	1	-	NIPA2P1	non imprinted in Prader-Willi/Angelman syndrome 2 pseudogene 1 [Source:HGNC Symbol;Acc:HGNC:42041]
ENSG00000250928	0.0001	0.0786287	-9.61891	0.63951	1	-	AC008629.3	-
ENSG00000260777	0.0001	0.0785683	-9.6178	0.0265893	1	-	AC061975.1	-
ENSG00000225521	0.0001	0.0784647	-9.6159	0.648195	1	-	AC005237.1	-
ENSG00000223345	0.0001	0.0782833	-9.61256	0.648195	1	-	HIST2H2BA	histone cluster 2 H2B family member a (pseudogene) [Source:HGNC Symbol;Acc:HGNC:20560]
ENSG00000106178	0.0001	0.07828	-9.6125	0.535162	1	-	CCL24	C-C motif chemokine ligand 24 [Source:HGNC Symbol;Acc:HGNC:10623]
ENSG00000256197	0.0001	0.078046	-9.60818	0.648195	1	-	TSPAN9-IT1	TSPAN9 intronic transcript 1 [Source:HGNC Symbol;Acc:HGNC:41462]
ENSG00000232965	0.0001	0.0780137	-9.60758	0.812184	1	-	RPS12P18	ribosomal protein S12 pseudogene 18 [Source:HGNC Symbol;Acc:HGNC:36421]
ENSG00000253404	0.0001	0.0779717	-9.60681	0.63951	1	-	AC034243.1	-
ENSG00000264083	0.0001	0.0779073	-9.60562	0.648195	1	-	AC005899.1	-
ENSG00000277504	0.0001	0.077893	-9.60535	0.644512	1	-	AC010536.3	-
ENSG00000145888	0.0001	0.077776	-9.60318	0.209909	1	-	GLRA1	glycine receptor alpha 1 [Source:HGNC Symbol;Acc:HGNC:4326]
ENSG00000103316	0.0001	0.0776733	-9.60128	0.405532	1	-	CRYM	crystallin mu [Source:HGNC Symbol;Acc:HGNC:2418]
ENSG00000257452	0.0001	0.0775527	-9.59903	0.543585	1	-	AC004551.1	-
ENSG00000108342	0.0001	0.0774913	-9.59789	0.265456	1	-	CSF3	colony stimulating factor 3 [Source:HGNC Symbol;Acc:HGNC:2438]
ENSG00000254095	0.0001	0.077459	-9.59729	0.648195	1	-	AC068672.3	-
ENSG00000253784	0.0001	0.0774237	-9.59663	0.63951	1	-	AC090735.1	-
ENSG00000235910	0.0001	0.077388	-9.59597	0.648195	1	-	APOA1-AS	APOA1 antisense RNA [Source:HGNC Symbol;Acc:HGNC:40079]
ENSG00000159713	0.0001	0.0770737	-9.59009	0.264926	1	-	TPPP3	tubulin polymerization promoting protein family member 3 [Source:HGNC Symbol;Acc:HGNC:24162]
ENSG00000249125	0.0001	0.077012	-9.58894	0.644512	1	-	AC093821.1	-
ENSG00000236673	0.0001	0.0770097	-9.5889	0.471148	1	-	AL117378.1	-
ENSG00000273870	0.0001	0.0770087	-9.58888	0.812184	1	-	AL138721.1	-
ENSG00000215246	0.0001	0.0769333	-9.58747	0.0863144	1	-	AC116351.1	-
ENSG00000180279	0.0001	0.076857	-9.58603	0.471148	1	-	LINC01869	long intergenic non-protein coding RNA 1869 [Source:HGNC Symbol;Acc:HGNC:25050]
ENSG00000256826	0.0001	0.0766623	-9.58237	0.812184	1	-	ATP5J2P4	ATP synthase, H+ transporting, mitochondrial Fo complex subunit F2 pseudogene 4 [Source:HGNC Symbol;Acc:HGNC:32451]
ENSG00000226659	0.0001	0.076573	-9.58069	0.644512	1	-	AC021028.1	-
ENSG00000253671	0.0001	0.0765007	-9.57933	0.543585	1	-	AC027117.1	-
ENSG00000235621	0.0001	0.0764473	-9.57832	0.0993645	1	-	LINC00494	long intergenic non-protein coding RNA 494 [Source:HGNC Symbol;Acc:HGNC:27657]
ENSG00000211832	0.0001	0.0763177	-9.57587	0.812184	1	-	TRAJ59	T-cell receptor alpha joining 59 (non-functional) [Source:HGNC Symbol;Acc:HGNC:12091]
ENSG00000272971	0.0001	0.0761783	-9.57324	0.644512	1	-	AL365181.4	-
ENSG00000244346	0.0001	0.0761087	-9.57192	0.648195	1	-	AC092953.1	-
ENSG00000253596	0.0001	0.0760763	-9.5713	0.644512	1	-	AC103952.1	-
ENSG00000253328	0.0001	0.0759333	-9.56859	0.812184	1	-	SUMO2P19	SUMO2 pseudogene 19 [Source:HGNC Symbol;Acc:HGNC:49357]
ENSG00000234244	0.0001	0.075771	-9.5655	0.648195	1	-	AL512641.1	-
ENSG00000271360	0.0001	0.0757127	-9.56439	0.466529	1	-	AL512631.2	-
ENSG00000279016	0.0001	0.0755623	-9.56152	0.644512	1	-	AC093648.1	-
ENSG00000227192	0.0001	0.0754867	-9.56008	0.648195	1	-	AL023581.2	-
ENSG00000256694	0.0001	0.075427	-9.55894	0.47456	1	-	AC026369.2	-
ENSG00000230823	0.0001	0.0753287	-9.55706	0.648195	1	-	CBX1P1	chromobox 1 pseudogene 1 [Source:HGNC Symbol;Acc:HGNC:38655]
ENSG00000284242	0.0001	0.0753103	-9.5567	0.644512	1	-	AC009452.1	-
ENSG00000211697	0.0001	0.0752927	-9.55637	0.644512	1	-	TRGV5	T-cell receptor gamma variable 5 [Source:HGNC Symbol;Acc:HGNC:12290]
ENSG00000270071	0.0001	0.075242	-9.55539	0.648195	1	-	AP001172.1	-
ENSG00000236483	0.0001	0.0752417	-9.55539	0.535162	1	-	MTND2P40	mitochondrially encoded NADH:ubiquinone oxidoreductase core subunit 2 pseudogene 40 [Source:HGNC Symbol;Acc:HGNC:52084]
ENSG00000139547	0.0001	0.075126	-9.55317	0.1024	1	-	RDH16	retinol dehydrogenase 16 (all-trans) [Source:HGNC Symbol;Acc:HGNC:29674]
ENSG00000250590	0.0001	0.075106	-9.55278	0.648195	1	-	AC097521.2	-
ENSG00000264150	0.0001	0.074825	-9.54738	0.63951	1	-	AP005136.1	-
ENSG00000267405	0.0001	0.074722	-9.54539	0.648195	1	-	AC005180.1	-
ENSG00000276667	0.0001	0.074681	-9.5446	0.643821	1	-	AL158077.1	-
ENSG00000201581	0.0001	0.0744823	-9.54075	0.648195	1	-	RN7SKP78	RNA, 7SK small nuclear pseudogene 78 [Source:HGNC Symbol;Acc:HGNC:45802]
ENSG00000275803	0.0001	0.0743403	-9.538	0.643821	1	-	RN7SL736P	RNA, 7SL, cytoplasmic 736, pseudogene [Source:HGNC Symbol;Acc:HGNC:46752]
ENSG00000265450	0.0001	0.0740057	-9.53149	0.812184	1	-	MIR4502	microRNA 4502 [Source:HGNC Symbol;Acc:HGNC:41534]
ENSG00000187556	0.0001	0.0738733	-9.52891	0.199448	1	-	NANOS3	nanos C2HC-type zinc finger 3 [Source:HGNC Symbol;Acc:HGNC:22048]
ENSG00000253819	0.0001	0.073866	-9.52877	0.520961	1	-	LINC01151	long intergenic non-protein coding RNA 1151 [Source:HGNC Symbol;Acc:HGNC:49471]
ENSG00000236849	0.0001	0.0738413	-9.52828	0.648195	1	-	LINC01474	long intergenic non-protein coding RNA 1474 [Source:HGNC Symbol;Acc:HGNC:51111]
ENSG00000248240	0.0001	0.073824	-9.52795	0.648195	1	-	AC114956.1	-
ENSG00000206113	0.0001	0.0736487	-9.52452	0.183672	1	-	CFAP99	cilia and flagella associated protein 99 [Source:HGNC Symbol;Acc:HGNC:51180]
ENSG00000127831	0.0001	0.073646	-9.52446	0.106551	1	-	VIL1	villin 1 [Source:HGNC Symbol;Acc:HGNC:12690]
ENSG00000280444	0.0001	0.0734703	-9.52102	0.648195	1	-	AC073592.10	-
ENSG00000264520	0.0001	0.073328	-9.51822	0.644512	1	-	AC005154.5	-
ENSG00000272597	0.0001	0.073311	-9.51789	0.644512	1	-	AC063944.3	-
ENSG00000231369	0.0001	0.073251	-9.5167	0.63951	1	-	Z97353.1	-
ENSG00000261302	0.0001	0.073173	-9.51517	0.466529	1	-	AC106779.1	-
ENSG00000213916	0.0001	0.072906	-9.50989	0.63951	1	-	AL662890.1	-
ENSG00000248206	0.0001	0.0728433	-9.50865	0.63951	1	-	AC074194.1	-
ENSG00000270182	0.0001	0.0727907	-9.50761	0.63951	1	-	AC004080.4	-
ENSG00000229618	0.0001	0.07271	-9.50601	0.644512	1	-	AC011287.1	-
ENSG00000070031	0.0001	0.0726987	-9.50579	0.63951	1	-	SCT	secretin [Source:HGNC Symbol;Acc:HGNC:10607]
ENSG00000272320	0.0001	0.07269	-9.50561	0.0945625	1	-	AL445309.1	-
ENSG00000261741	0.0001	0.072541	-9.50265	0.540009	1	-	FRG2KP	FSHD region gene 2 family member K, pseudogene [Source:HGNC Symbol;Acc:HGNC:51797]
ENSG00000267786	0.0001	0.072502	-9.50188	0.644512	1	-	AF038458.3	-
ENSG00000256705	0.0001	0.0724927	-9.50169	0.648195	1	-	AL137779.1	-
ENSG00000215734	0.0001	0.0719117	-9.49008	0.644512	1	-	MRPL20P1	mitochondrial ribosomal protein L20 pseudogene 1 [Source:HGNC Symbol;Acc:HGNC:29699]
ENSG00000264067	0.0001	0.0718823	-9.48949	0.63951	1	-	AC005291.1	-
ENSG00000215102	0.0001	0.0715527	-9.48286	0.403093	1	-	TERF1P4	telomeric repeat binding factor 1 pseudogene 4 [Source:HGNC Symbol;Acc:HGNC:38500]
ENSG00000261187	0.0001	0.0713023	-9.47781	0.40894	1	-	AC079322.1	-
ENSG00000284479	0.0001	0.0709653	-9.47097	0.812184	1	-	AC009477.2	-
ENSG00000261195	0.0001	0.0709547	-9.47075	0.644512	1	-	AC027130.1	-
ENSG00000234145	0.0001	0.070892	-9.46948	0.285306	1	-	NAP1L4P3	nucleosome assembly protein 1 like 4 pseudogene 3 [Source:HGNC Symbol;Acc:HGNC:39738]
ENSG00000252562	0.0001	0.0708877	-9.46939	0.812184	1	-	RNU6-922P	RNA, U6 small nuclear 922, pseudogene [Source:HGNC Symbol;Acc:HGNC:47885]
ENSG00000256361	0.0001	0.0708357	-9.46833	0.515319	1	-	AC027544.1	-
ENSG00000241568	0.0001	0.070766	-9.46691	0.812184	1	-	RN7SL338P	RNA, 7SL, cytoplasmic 338, pseudogene [Source:HGNC Symbol;Acc:HGNC:46354]
ENSG00000244355	0.0001	0.070672	-9.46499	0.63951	1	-	LY6G6D	lymphocyte antigen 6 family member G6D [Source:HGNC Symbol;Acc:HGNC:13935]
ENSG00000252164	0.0001	0.0706647	-9.46485	0.812184	1	-	RNA5SP282	RNA, 5S ribosomal pseudogene 282 [Source:HGNC Symbol;Acc:HGNC:43182]
ENSG00000240098	0.0001	0.070601	-9.46354	0.812184	1	-	RN7SL351P	RNA, 7SL, cytoplasmic 351, pseudogene [Source:HGNC Symbol;Acc:HGNC:46367]
ENSG00000231521	0.0001	0.0705807	-9.46313	0.812184	1	-	AL162385.2	-
ENSG00000146147	0.0001	0.0704727	-9.46092	0.47456	1	-	MLIP	muscular LMNA interacting protein [Source:HGNC Symbol;Acc:HGNC:21355]
ENSG00000199695	0.0001	0.0704533	-9.46052	0.812184	1	-	RNU6-1128P	RNA, U6 small nuclear 1128, pseudogene [Source:HGNC Symbol;Acc:HGNC:48091]
ENSG00000252349	0.0001	0.070447	-9.46039	0.812184	1	-	SNORA31	Small nucleolar RNA SNORA31 [Source:RFAM;Acc:RF00322]
ENSG00000275646	0.0001	0.0704333	-9.46011	0.643821	1	-	SMAD5-AS1_2	SMAD5 antisense RNA 1 conserved region 2 [Source:RFAM;Acc:RF02174]
ENSG00000252850	0.0001	0.070327	-9.45793	0.812184	1	-	RNU1-117P	RNA, U1 small nuclear 117, pseudogene [Source:HGNC Symbol;Acc:HGNC:48459]
ENSG00000229920	0.0001	0.070153	-9.45436	0.515319	1	-	RPS4XP5	ribosomal protein S4X pseudogene 5 [Source:HGNC Symbol;Acc:HGNC:36670]
ENSG00000220506	0.0001	0.0700163	-9.45155	0.644512	1	-	AL136310.1	-
ENSG00000279250	0.0001	0.0698333	-9.44777	0.648195	1	-	AC022919.1	-
ENSG00000207208	0.0001	0.0697763	-9.44659	0.812184	1	-	RNU6-790P	RNA, U6 small nuclear 790, pseudogene [Source:HGNC Symbol;Acc:HGNC:47753]
ENSG00000243420	0.0001	0.0696687	-9.44437	0.812184	1	-	RN7SL734P	RNA, 7SL, cytoplasmic 734, pseudogene [Source:HGNC Symbol;Acc:HGNC:46750]
ENSG00000274159	0.0001	0.0696603	-9.44419	0.63951	1	-	AL133243.1	-
ENSG00000270402	0.0001	0.0695743	-9.44241	0.63951	1	-	AC011458.1	-
ENSG00000236796	0.0001	0.0695163	-9.44121	0.471148	1	-	AL157884.3	-
ENSG00000237166	0.0001	0.0694447	-9.43972	0.213648	1	-	LINC01792	long intergenic non-protein coding RNA 1792 [Source:HGNC Symbol;Acc:HGNC:52582]
ENSG00000224259	0.0001	0.069292	-9.43654	0.47456	1	-	LINC01133	long intergenic non-protein coding RNA 1133 [Source:HGNC Symbol;Acc:HGNC:49447]
ENSG00000263698	0.0001	0.0692027	-9.43468	0.403093	1	-	AC012417.1	-
ENSG00000235042	0.0001	0.0691837	-9.43429	0.63951	1	-	AC098820.2	-
ENSG00000227356	0.0001	0.0690893	-9.43232	0.648195	1	-	LINC00866	long intergenic non-protein coding RNA 866 [Source:HGNC Symbol;Acc:HGNC:45232]
ENSG00000212306	0.0001	0.0690877	-9.43228	0.812184	1	-	Y_RNA	Y RNA [Source:RFAM;Acc:RF00019]
ENSG00000175097	0.0001	0.069061	-9.43173	0.648195	1	-	RAG2	recombination activating 2 [Source:HGNC Symbol;Acc:HGNC:9832]
ENSG00000227906	0.0001	0.0690413	-9.43132	0.264926	1	-	SNAP25-AS1	SNAP25 antisense RNA 1 [Source:HGNC Symbol;Acc:HGNC:44312]
ENSG00000261765	0.0001	0.0689683	-9.42979	0.63951	1	-	AC009127.2	-
ENSG00000242578	0.0001	0.0689617	-9.42965	0.644512	1	-	AC073288.2	-
ENSG00000250726	0.0001	0.068857	-9.42746	0.648195	1	-	AC107222.1	-
ENSG00000250330	0.0001	0.0686773	-9.42369	0.643821	1	-	AC016559.2	-
ENSG00000264655	0.0001	0.0684497	-9.4189	0.648195	1	-	AC080112.1	-
ENSG00000233875	0.0001	0.0683207	-9.41618	0.812184	1	-	AL592078.1	-
ENSG00000284334	1.23333e-05	0.00842067	-9.41523	0.758102	1	-	MIR4651	microRNA 4651 [Source:HGNC Symbol;Acc:HGNC:41647]
ENSG00000213055	0.0001	0.0681603	-9.41279	0.63951	1	-	EEF1B2P7	eukaryotic translation elongation factor 1 beta 2 pseudogene 7 [Source:HGNC Symbol;Acc:HGNC:51454]
ENSG00000279354	0.0001	0.0680913	-9.41133	0.644512	1	-	AC090373.1	-
ENSG00000237136	0.0001	0.0680873	-9.41124	0.543585	1	-	C4orf51	chromosome 4 open reading frame 51 [Source:HGNC Symbol;Acc:HGNC:37264]
ENSG00000234896	0.0001	0.0680457	-9.41036	0.648195	1	-	OR7E62P	olfactory receptor family 7 subfamily E member 62 pseudogene [Source:HGNC Symbol;Acc:HGNC:8438]
ENSG00000135077	0.0001	0.068024	-9.4099	0.421228	1	-	HAVCR2	hepatitis A virus cellular receptor 2 [Source:HGNC Symbol;Acc:HGNC:18437]
ENSG00000258736	0.0001	0.0679363	-9.40804	0.63951	1	-	AL583722.3	-
ENSG00000249978	0.0001	0.0679257	-9.40781	0.648195	1	-	TRGV7	T-cell receptor gamma variable 7 (pseudogene) [Source:HGNC Symbol;Acc:HGNC:12293]
ENSG00000188771	0.0001	0.0678777	-9.40679	0.471148	1	-	PLET1	placenta expressed transcript 1 [Source:HGNC Symbol;Acc:HGNC:30053]
ENSG00000203618	0.0001	0.067553	-9.39988	0.416835	1	-	GP1BB	glycoprotein Ib platelet beta subunit [Source:HGNC Symbol;Acc:HGNC:4440]
ENSG00000261868	0.0001	0.0675497	-9.3998	0.405532	1	-	MFSD1P1	major facilitator superfamily domain containing 1 pseudogene 1 [Source:HGNC Symbol;Acc:HGNC:50625]
ENSG00000185924	0.0001	0.0675423	-9.39965	0.111253	1	-	RTN4RL1	reticulon 4 receptor like 1 [Source:HGNC Symbol;Acc:HGNC:21329]
ENSG00000226677	0.0001	0.0674007	-9.39662	0.516978	1	-	IGBP1P1	immunoglobulin (CD79A) binding protein 1 pseudogene 1 [Source:HGNC Symbol;Acc:HGNC:19709]
ENSG00000204801	0.0001	0.06732	-9.39489	0.643821	1	-	FGF7P7	fibroblast growth factor 7 pseudogene 7 [Source:HGNC Symbol;Acc:HGNC:33589]
ENSG00000253971	0.0001	0.06721	-9.39253	0.63951	1	-	CDC42P3	cell division cycle 42 pseudogene 3 [Source:HGNC Symbol;Acc:HGNC:44427]
ENSG00000269873	0.0001	0.0669957	-9.38792	0.812184	1	-	AC245884.10	-
ENSG00000284193	0.0001	0.0669487	-9.38691	0.812184	1	-	MIR1257	microRNA 1257 [Source:HGNC Symbol;Acc:HGNC:35322]
ENSG00000233776	0.0001	0.0669173	-9.38624	0.648195	1	-	LINC01251	long intergenic non-protein coding RNA 1251 [Source:HGNC Symbol;Acc:HGNC:49845]
ENSG00000235481	0.0001	0.066809	-9.3839	0.648195	1	-	UBE2R2-AS1	UBE2R2 antisense RNA 1 [Source:HGNC Symbol;Acc:HGNC:49911]
ENSG00000176153	0.0001	0.0667753	-9.38317	0.471148	1	-	GPX2	glutathione peroxidase 2 [Source:HGNC Symbol;Acc:HGNC:4554]
ENSG00000266560	0.0001	0.066685	-9.38122	0.543585	1	-	AF274856.1	-
ENSG00000244358	0.0001	0.0666413	-9.38027	0.644512	1	-	AC055758.2	-
ENSG00000275950	0.0001	0.0666107	-9.37961	0.812184	1	-	MIR6724-1	microRNA 6724-1 [Source:HGNC Symbol;Acc:HGNC:50837]
ENSG00000116882	0.0001	0.0664857	-9.3769	0.264926	1	-	HAO2	hydroxyacid oxidase 2 [Source:HGNC Symbol;Acc:HGNC:4810]
ENSG00000227726	0.0001	0.06645	-9.37613	0.812184	1	-	AP001271.1	-
ENSG00000171133	0.0001	0.0664367	-9.37584	0.535162	1	-	OR2K2	olfactory receptor family 2 subfamily K member 2 [Source:HGNC Symbol;Acc:HGNC:8264]
ENSG00000279182	0.0001	0.0663903	-9.37483	0.543585	1	-	CR559946.2	-
ENSG00000151704	0.0001	0.0663383	-9.3737	0.0157334	1	-	KCNJ1	potassium voltage-gated channel subfamily J member 1 [Source:HGNC Symbol;Acc:HGNC:6255]
ENSG00000225984	0.0001	0.0662733	-9.37228	0.520961	1	-	HMGB1P26	high mobility group box 1 pseudogene 26 [Source:HGNC Symbol;Acc:HGNC:39117]
ENSG00000121410	0.0001	0.0662013	-9.37072	0.209909	1	-	A1BG	alpha-1-B glycoprotein [Source:HGNC Symbol;Acc:HGNC:5]
ENSG00000235072	0.0001	0.066196	-9.3706	0.648195	1	-	AC012074.1	-
ENSG00000233609	0.0001	0.0661567	-9.36974	0.648195	1	-	RPL10P19	ribosomal protein L10 pseudogene 19 [Source:HGNC Symbol;Acc:HGNC:52350]
ENSG00000148488	0.0001	0.066107	-9.36866	0.63951	1	-	ST8SIA6	ST8 alpha-N-acetyl-neuraminide alpha-2,8-sialyltransferase 6 [Source:HGNC Symbol;Acc:HGNC:23317]
ENSG00000241269	0.0001	0.0660883	-9.36825	0.644512	1	-	AC093620.1	-
ENSG00000230276	0.0001	0.066042	-9.36724	0.648195	1	-	AL162388.1	-
ENSG00000267938	0.0001	0.065964	-9.36554	0.812184	1	-	EIF1P6	eukaryotic translation initiation factor 1 pseudogene 6 [Source:HGNC Symbol;Acc:HGNC:49619]
ENSG00000269833	0.0001	0.0657383	-9.36059	0.63951	1	-	AC234771.6	-
ENSG00000271554	0.0001	0.0656237	-9.35807	0.648195	1	-	AL138787.2	-
ENSG00000111341	0.0001	0.0655893	-9.35732	0.466529	1	-	MGP	matrix Gla protein [Source:HGNC Symbol;Acc:HGNC:7060]
ENSG00000229177	0.0001	0.0652653	-9.35017	0.812184	1	-	AC008154.1	-
ENSG00000211820	0.0001	0.0650447	-9.34529	0.812184	1	-	TRAV41	T-cell receptor alpha variable 41 [Source:HGNC Symbol;Acc:HGNC:12142]
ENSG00000264340	0.0001	0.064962	-9.34345	0.812184	1	-	AC009704.1	-
ENSG00000239767	0.0001	0.064921	-9.34254	0.63951	1	-	AC108733.1	-
ENSG00000213262	0.0001	0.064858	-9.34114	0.417024	1	-	VDAC2P3	voltage dependent anion channel 2 pseudogene 3 [Source:HGNC Symbol;Acc:HGNC:51931]
ENSG00000238121	0.0001	0.0648123	-9.34012	0.535162	1	-	LINC00426	long intergenic non-protein coding RNA 426 [Source:HGNC Symbol;Acc:HGNC:42761]
ENSG00000281731	0.0001	0.0646533	-9.33658	0.63951	1	-	AC110079.2	-
ENSG00000235514	0.0001	0.0646113	-9.33564	0.648195	1	-	LLPHP2	LLP homolog, long-term synaptic facilitation pseudogene 2 [Source:HGNC Symbol;Acc:HGNC:50492]
ENSG00000241825	0.0001	0.0645977	-9.33534	0.648195	1	-	RPL7P42	ribosomal protein L7 pseudogene 42 [Source:HGNC Symbol;Acc:HGNC:35543]
ENSG00000228040	0.0001	0.0645767	-9.33487	0.812184	1	-	AL390729.2	-
ENSG00000264812	0.0001	0.0645027	-9.33321	0.648195	1	-	AC132938.2	-
ENSG00000150045	0.0001	0.0642193	-9.32686	0.403093	1	-	KLRF1	killer cell lectin like receptor F1 [Source:HGNC Symbol;Acc:HGNC:13342]
ENSG00000242837	0.0001	0.064136	-9.32499	0.648195	1	-	RPL21P13	ribosomal protein L21 pseudogene 13 [Source:HGNC Symbol;Acc:HGNC:19812]
ENSG00000277562	0.0001	0.0640193	-9.32236	0.648195	1	-	AC010320.5	-
ENSG00000274060	0.0001	0.0639393	-9.32056	0.812184	1	-	MIR6724-2	microRNA 6724-2 [Source:HGNC Symbol;Acc:HGNC:50832]
ENSG00000228971	0.0001	0.0638883	-9.31941	0.466529	1	-	AL356479.1	-
ENSG00000251513	0.0001	0.0637137	-9.31546	0.332683	1	-	LIX1-AS1	LIX1 and RIOK2 antisense RNA 1 [Source:HGNC Symbol;Acc:HGNC:52976]
ENSG00000222248	0.0001	0.0636703	-9.31448	0.812184	1	-	RNA5SP201	RNA, 5S ribosomal pseudogene 201 [Source:HGNC Symbol;Acc:HGNC:43101]
ENSG00000258965	0.0001	0.063453	-9.30954	0.643821	1	-	AC044913.1	-
ENSG00000252611	0.0001	0.063408	-9.30852	0.812184	1	-	RNU6-1121P	RNA, U6 small nuclear 1121, pseudogene [Source:HGNC Symbol;Acc:HGNC:48084]
ENSG00000231329	0.0001	0.063292	-9.30588	0.63951	1	-	AL031772.1	-
ENSG00000220204	0.0001	0.063288	-9.30579	0.812184	1	-	AL035079.1	-
ENSG00000226798	0.0001	0.0632143	-9.30411	0.543585	1	-	AL138749.1	-
ENSG00000175728	0.0001	0.0632047	-9.30389	0.121392	1	-	C11orf44	chromosome 11 open reading frame 44 [Source:HGNC Symbol;Acc:HGNC:26805]
ENSG00000086696	0.0001	0.0631243	-9.30205	0.466529	1	-	HSD17B2	hydroxysteroid 17-beta dehydrogenase 2 [Source:HGNC Symbol;Acc:HGNC:5211]
ENSG00000225764	0.0001	0.0631183	-9.30192	0.63951	1	-	P3H2-AS1	P3H2 antisense RNA 1 [Source:HGNC Symbol;Acc:HGNC:40886]
ENSG00000218069	0.0001	0.0629307	-9.29762	0.63951	1	-	RSL24D1P1	ribosomal L24 domain containing 1 pseudogene 1 [Source:HGNC Symbol;Acc:HGNC:13979]
ENSG00000223390	0.0001	0.0624873	-9.28742	0.535162	1	-	AL445685.1	-
ENSG00000256280	0.0001	0.0622827	-9.28269	0.812184	1	-	AP006289.1	-
ENSG00000182853	0.0001	0.0621813	-9.28034	0.63951	1	-	VMO1	vitelline membrane outer layer 1 homolog [Source:HGNC Symbol;Acc:HGNC:30387]
ENSG00000257202	0.0001	0.0621443	-9.27948	0.648195	1	-	AC084398.2	-
ENSG00000279465	0.0001	0.062049	-9.27726	0.520961	1	-	AC090950.2	-
ENSG00000233518	0.0001	0.0618503	-9.27264	0.63951	1	-	RPL7P35	ribosomal protein L7 pseudogene 35 [Source:HGNC Symbol;Acc:HGNC:36153]
ENSG00000279964	0.0001	0.061771	-9.27079	0.416835	1	-	AC009949.1	-
ENSG00000256312	0.0001	0.061665	-9.26831	0.644512	1	-	AC138466.1	-
ENSG00000259821	0.0001	0.0615467	-9.26554	0.644512	1	-	AC018845.1	-
ENSG00000279570	0.0001	0.061431	-9.26282	0.648195	1	-	AC099804.1	-
ENSG00000235513	0.0001	0.06138	-9.26162	0.355116	1	-	AL035681.1	-
ENSG00000277379	0.0001	0.0612683	-9.259	0.812184	1	-	MIR6724-3	microRNA 6724-3 [Source:HGNC Symbol;Acc:HGNC:50842]
ENSG00000235497	0.0001	0.0612153	-9.25775	0.63951	1	-	AC012506.4	-
ENSG00000226302	0.0001	0.061174	-9.25677	0.648195	1	-	AC122683.1	-
ENSG00000235493	0.0001	0.0611547	-9.25632	0.543585	1	-	LINC01967	long intergenic non-protein coding RNA 1967 [Source:HGNC Symbol;Acc:HGNC:52793]
ENSG00000248886	0.0001	0.0611003	-9.25504	0.63951	1	-	UGT2A3P7	UDP glucuronosyltransferase family 2 member A3 pseudogene 7 [Source:HGNC Symbol;Acc:HGNC:39429]
ENSG00000273252	0.0001	0.0610543	-9.25395	0.812184	1	-	AC079882.1	-
ENSG00000090402	0.0001	0.06097	-9.25196	0.812184	1	-	SI	sucrase-isomaltase [Source:HGNC Symbol;Acc:HGNC:10856]
ENSG00000243038	0.0001	0.0609613	-9.25175	0.63951	1	-	AL117692.1	-
ENSG00000166143	0.0001	0.0608673	-9.24952	0.63951	1	-	PPP1R14D	protein phosphatase 1 regulatory inhibitor subunit 14D [Source:HGNC Symbol;Acc:HGNC:14953]
ENSG00000224421	0.0001	0.0607817	-9.24749	0.812184	1	-	ATP5J2LP	ATP synthase, H+ transporting, mitochondrial Fo complex subunit F2-like pseudogene [Source:HGNC Symbol;Acc:HGNC:849]
ENSG00000202310	0.0001	0.0607717	-9.24726	0.812184	1	-	Y_RNA	Y RNA [Source:RFAM;Acc:RF00019]
ENSG00000275852	0.0001	0.0607337	-9.24635	0.648195	1	-	LINC01742	long intergenic non-protein coding RNA 1742 [Source:HGNC Symbol;Acc:HGNC:52530]
ENSG00000269887	0.0001	0.0607317	-9.24631	0.648195	1	-	AL391001.1	-
ENSG00000255910	0.0001	0.0606817	-9.24512	0.648195	1	-	AC024901.1	-
ENSG00000151640	0.0001	0.0604113	-9.23868	0.520961	1	-	DPYSL4	dihydropyrimidinase like 4 [Source:HGNC Symbol;Acc:HGNC:3016]
ENSG00000270986	0.0001	0.0601837	-9.23323	0.63951	1	-	HMGB1P51	high mobility group box 1 pseudogene 51 [Source:HGNC Symbol;Acc:HGNC:52369]
ENSG00000204055	0.0001	0.0601747	-9.23301	0.37867	1	-	AL158151.1	-
ENSG00000269950	0.0001	0.060167	-9.23283	0.648195	1	-	AP000962.1	-
ENSG00000267669	0.0001	0.0601597	-9.23265	0.63951	1	-	AC098847.2	-
ENSG00000263017	0.0001	0.0601507	-9.23244	0.812184	1	-	AC036164.1	-
ENSG00000277941	0.0001	0.060136	-9.23209	0.812184	1	-	MIAT_exon5_1	Myocardial infarction associated transcript exon 5 conserved region 1 [Source:RFAM;Acc:RF01875]
ENSG00000230573	0.0001	0.060086	-9.23089	0.644512	1	-	AL513303.2	-
ENSG00000282218	0.0001	0.060041	-9.2298	0.540009	1	-	AL132671.2	-
ENSG00000272334	0.0001	0.059955	-9.22774	0.648195	1	-	AC011816.2	-
ENSG00000279951	0.0001	0.0599243	-9.227	0.471148	1	-	AL138688.2	-
ENSG00000173947	0.0001	0.0598607	-9.22546	0.648195	1	-	PIFO	primary cilia formation [Source:HGNC Symbol;Acc:HGNC:27009]
ENSG00000241596	0.0001	0.0598407	-9.22498	0.644512	1	-	AC092468.1	-
ENSG00000244193	0.0001	0.0597953	-9.22389	0.63951	1	-	AC008040.4	-
ENSG00000234650	0.0001	0.0597047	-9.2217	0.644512	1	-	PCCA-AS1	PCCA antisense RNA 1 [Source:HGNC Symbol;Acc:HGNC:39901]
ENSG00000277738	0.0001	0.0596043	-9.21927	0.644512	1	-	AC126175.1	-
ENSG00000200091	0.0001	0.0595737	-9.21853	0.812184	1	-	RN7SKP163	RNA, 7SK small nuclear pseudogene 163 [Source:HGNC Symbol;Acc:HGNC:45887]
ENSG00000273557	0.0001	0.059494	-9.2166	0.812184	1	-	AC008781.3	-
ENSG00000253385	0.0001	0.0594407	-9.21531	0.63951	1	-	AP003696.1	-
ENSG00000254288	0.0001	0.0594333	-9.21513	0.648195	1	-	AC087672.3	-
ENSG00000213386	0.0001	0.0594333	-9.21513	0.648195	1	-	AC022217.1	-
ENSG00000226813	0.0001	0.059409	-9.21454	0.63951	1	-	LINC01941	long intergenic non-protein coding RNA 1941 [Source:HGNC Symbol;Acc:HGNC:52764]
ENSG00000200620	0.0001	0.0592973	-9.21182	0.812184	1	-	SNORA7	Small nucleolar RNA SNORA7 [Source:RFAM;Acc:RF00409]
ENSG00000223469	0.0001	0.059215	-9.20982	0.648195	1	-	AL157371.1	-
ENSG00000232698	0.0001	0.059151	-9.20826	0.648195	1	-	AP001058.1	-
ENSG00000228014	0.0001	0.0591387	-9.20796	0.40894	1	-	ZNF680P1	ZNF680 pseudogene 1 [Source:HGNC Symbol;Acc:HGNC:50379]
ENSG00000221125	0.0001	0.0590383	-9.20551	0.812184	1	-	U3	Small nucleolar RNA U3 [Source:RFAM;Acc:RF00012]
ENSG00000121933	0.0001	0.0589927	-9.20439	0.411196	1	-	TMIGD3	transmembrane and immunoglobulin domain containing 3 [Source:HGNC Symbol;Acc:HGNC:51375]
ENSG00000095370	0.0001	0.0587643	-9.1988	0.171033	1	-	SH2D3C	SH2 domain containing 3C [Source:HGNC Symbol;Acc:HGNC:16884]
ENSG00000238059	0.0001	0.0586783	-9.19668	0.642001	1	-	HSPE1P21	heat shock protein family E (Hsp10) member 1 pseudogene 21 [Source:HGNC Symbol;Acc:HGNC:49340]
ENSG00000254328	0.0001	0.058643	-9.19582	0.812184	1	-	AC008429.4	-
ENSG00000228546	0.0001	0.0586387	-9.19571	0.812184	1	-	AC091390.2	-
ENSG00000275692	0.0001	0.0585973	-9.19469	0.812184	1	-	MIR6724-4	microRNA 6724-4 [Source:HGNC Symbol;Acc:HGNC:50830]
ENSG00000267268	0.0001	0.058577	-9.19419	0.63951	1	-	AC007204.1	-
ENSG00000232927	0.0001	0.0585133	-9.19262	0.40894	1	-	USP12PY	ubiquitin specific peptidase 12 pseudogene, Y-linked [Source:HGNC Symbol;Acc:HGNC:23195]
ENSG00000267679	0.0001	0.0584807	-9.19182	0.520961	1	-	EIF5AP2	eukaryotic translation initiation factor 5A pseudogene 2 [Source:HGNC Symbol;Acc:HGNC:3303]
ENSG00000260483	0.0001	0.0584093	-9.19006	0.812184	1	-	AC015720.1	-
ENSG00000189269	0.0001	0.0583863	-9.18949	0.405532	1	-	DRICH1	aspartate rich 1 [Source:HGNC Symbol;Acc:HGNC:28031]
ENSG00000120937	0.0001	0.0583397	-9.18833	0.648195	1	-	NPPB	natriuretic peptide B [Source:HGNC Symbol;Acc:HGNC:7940]
ENSG00000231544	0.0001	0.0582757	-9.18675	0.642001	1	-	RSL24D1P11	ribosomal L24 domain containing 1 pseudogene 11 [Source:HGNC Symbol;Acc:HGNC:37881]
ENSG00000243260	0.0001	0.0581957	-9.18477	0.812184	1	-	RN7SL558P	RNA, 7SL, cytoplasmic 558, pseudogene [Source:HGNC Symbol;Acc:HGNC:46574]
ENSG00000217653	0.0001	0.058095	-9.18227	0.648195	1	-	AL353692.1	-
ENSG00000228629	0.0001	0.0579507	-9.17868	0.648195	1	-	AC092295.1	-
ENSG00000275178	0.0001	0.0578613	-9.17646	0.812184	1	-	AC018529.1	-
ENSG00000212615	0.0001	0.0578167	-9.17534	0.812184	1	-	SNORD58	Small nucleolar RNA SNORD58 [Source:RFAM;Acc:RF00151]
ENSG00000251889	0.0001	0.0577833	-9.17451	0.812184	1	-	RNU4-49P	RNA, U4 small nuclear 49, pseudogene [Source:HGNC Symbol;Acc:HGNC:46985]
ENSG00000214111	0.0001	0.057763	-9.174	0.648195	1	-	AC002504.1	-
ENSG00000172073	0.0001	0.0575983	-9.16988	0.644512	1	-	TEX37	testis expressed 37 [Source:HGNC Symbol;Acc:HGNC:26341]
ENSG00000243410	0.0001	0.057573	-9.16925	0.644512	1	-	PSMD6-AS1	PSMD6 antisense RNA 1 [Source:HGNC Symbol;Acc:HGNC:40480]
ENSG00000233012	0.0001	0.057489	-9.16714	0.543585	1	-	HDAC1P2	histone deacetylase 1 pseudogene 2 [Source:HGNC Symbol;Acc:HGNC:45191]
ENSG00000235917	0.0001	0.0573697	-9.16414	0.63951	1	-	MTCO2P11	mitochondrially encoded cytochrome c oxidase II pseudogene 11 [Source:HGNC Symbol;Acc:HGNC:52027]
ENSG00000283597	0.0001	0.057332	-9.1632	0.63951	1	-	FAM169B	family with sequence similarity 169 member B [Source:HGNC Symbol;Acc:HGNC:26835]
ENSG00000265897	0.0001	0.0573167	-9.16281	0.812184	1	-	AC233263.1	-
ENSG00000282757	0.0001	0.0572983	-9.16235	0.516978	1	-	DUXB	double homeobox B [Source:HGNC Symbol;Acc:HGNC:33345]
ENSG00000259876	0.0001	0.05723	-9.16063	0.644512	1	-	AC010333.1	-
ENSG00000276645	0.0001	0.057211	-9.16015	0.812184	1	-	Metazoa_SRP	Metazoan signal recognition particle RNA [Source:RFAM;Acc:RF00017]
ENSG00000245330	0.0001	0.0570493	-9.15607	0.260353	1	-	AP005717.1	-
ENSG00000260659	0.0001	0.0570493	-9.15607	0.812184	1	-	AC009113.2	-
ENSG00000080709	0.0001	0.057005	-9.15494	0.466529	1	-	KCNN2	potassium calcium-activated channel subfamily N member 2 [Source:HGNC Symbol;Acc:HGNC:6291]
ENSG00000251377	0.0001	0.056988	-9.15451	0.63951	1	-	AC079340.2	-
ENSG00000270174	0.0001	0.0569763	-9.15422	0.63951	1	-	AL022097.1	-
ENSG00000261419	0.0001	0.056973	-9.15413	0.812184	1	-	AC145285.5	-
ENSG00000279886	0.0001	0.0569457	-9.15344	0.644512	1	-	AC087645.3	-
ENSG00000223576	0.0001	0.0568633	-9.15135	0.63951	1	-	AL355001.1	-
ENSG00000279113	0.0001	0.056706	-9.14736	0.648195	1	-	AC148477.7	-
ENSG00000234061	0.0001	0.0566453	-9.14581	0.812184	1	-	AC007969.2	-
ENSG00000259215	0.0001	0.0565347	-9.14299	0.648195	1	-	AC027237.2	-
ENSG00000248112	0.0001	0.05652	-9.14262	0.648195	1	-	AC108174.1	-
ENSG00000135346	0.0001	0.0564953	-9.14199	0.540009	1	-	CGA	glycoprotein hormones, alpha polypeptide [Source:HGNC Symbol;Acc:HGNC:1885]
ENSG00000019582	0.0001	0.0564067	-9.13972	0.40894	1	-	CD74	CD74 molecule [Source:HGNC Symbol;Acc:HGNC:1697]
ENSG00000264706	0.0001	0.0563873	-9.13923	0.812184	1	-	RN7SL217P	RNA, 7SL, cytoplasmic 217, pseudogene [Source:HGNC Symbol;Acc:HGNC:46233]
ENSG00000136250	0.0001	0.056357	-9.13845	0.265456	1	-	AOAH	acyloxyacyl hydrolase [Source:HGNC Symbol;Acc:HGNC:548]
ENSG00000254610	0.0001	0.0563343	-9.13787	0.648195	1	-	AC004923.1	-
ENSG00000253418	0.0001	0.0563053	-9.13713	0.648195	1	-	SNX18P27	sorting nexin 18 pseudogene 27 [Source:HGNC Symbol;Acc:HGNC:39635]
ENSG00000217404	0.0001	0.056233	-9.13527	0.648195	1	-	RPS4XP9	ribosomal protein S4X pseudogene 9 [Source:HGNC Symbol;Acc:HGNC:35792]
ENSG00000255671	0.0001	0.0561923	-9.13423	0.812184	1	-	AC007406.1	-
ENSG00000250604	0.0001	0.056079	-9.13132	0.812184	1	-	AC098679.2	-
ENSG00000232504	0.0001	0.0560177	-9.12974	0.648195	1	-	ST3GAL5-AS1	ST3GAL5 antisense RNA 1 (head to head) [Source:HGNC Symbol;Acc:HGNC:51129]
ENSG00000279817	0.0001	0.055983	-9.12884	0.63951	1	-	AC073911.3	-
ENSG00000278973	0.0001	0.055858	-9.12562	0.648195	1	-	AC073592.2	-
ENSG00000272416	0.0001	0.0558503	-9.12542	0.63951	1	-	AC025175.1	-
ENSG00000264734	0.0001	0.0556973	-9.12146	0.812184	1	-	AC069061.2	-
ENSG00000279044	0.0001	0.055651	-9.12026	0.648195	1	-	AC007787.2	-
ENSG00000261706	0.0001	0.0555713	-9.1182	0.644512	1	-	AP001505.1	-
ENSG00000270317	0.0001	0.0555593	-9.11789	0.812184	1	-	AC004004.1	-
ENSG00000227890	0.0001	0.0555193	-9.11685	0.63951	1	-	PSMA2P3	proteasome subunit alpha 2 pseudogene 3 [Source:HGNC Symbol;Acc:HGNC:43834]
ENSG00000113520	0.0001	0.0554697	-9.11556	0.644512	1	-	IL4	interleukin 4 [Source:HGNC Symbol;Acc:HGNC:6014]
ENSG00000241821	0.0001	0.0553627	-9.11277	0.812184	1	-	RN7SL170P	RNA, 7SL, cytoplasmic 170, pseudogene [Source:HGNC Symbol;Acc:HGNC:46186]
ENSG00000257859	0.0001	0.0551113	-9.10621	0.260353	1	-	CASC18	cancer susceptibility 18 (non-protein coding) [Source:HGNC Symbol;Acc:HGNC:49463]
ENSG00000242268	0.0001	0.0550347	-9.1042	0.644512	1	-	LINC02082	long intergenic non-protein coding RNA 2082 [Source:HGNC Symbol;Acc:HGNC:52931]
ENSG00000226508	0.0001	0.0550337	-9.10417	0.648195	1	-	LINC01918	long intergenic non-protein coding RNA 1918 [Source:HGNC Symbol;Acc:HGNC:52737]
ENSG00000270773	0.0001	0.0549983	-9.10324	0.63951	1	-	AC137695.2	-
ENSG00000258809	0.0001	0.054997	-9.10321	0.644512	1	-	AL161756.2	-
ENSG00000280113	0.0001	0.054968	-9.10245	0.648195	1	-	AL357140.3	-
ENSG00000260635	0.0001	0.0549177	-9.10113	0.63951	1	-	AC092338.1	-
ENSG00000249919	0.0001	0.0548593	-9.09959	0.812184	1	-	FABP5P6	fatty acid binding protein 5 pseudogene 6 [Source:HGNC Symbol;Acc:HGNC:31069]
ENSG00000268955	0.0001	0.054855	-9.09948	0.648195	1	-	AC068020.1	-
ENSG00000261574	0.0001	0.054853	-9.09943	0.812184	1	-	AC092120.1	-
ENSG00000200225	0.0001	0.0548273	-9.09875	0.812184	1	-	RNA5SP382	RNA, 5S ribosomal pseudogene 382 [Source:HGNC Symbol;Acc:HGNC:43282]
ENSG00000227348	0.0001	0.054713	-9.09574	0.648195	1	-	MTND5P25	mitochondrially encoded NADH:ubiquinone oxidoreductase core subunit 5 pseudogene 25 [Source:HGNC Symbol;Acc:HGNC:42287]
ENSG00000283101	0.0001	0.0545433	-9.09126	0.812184	1	-	BMS1P21	BMS1, ribosome biogenesis factor pseudogene 21 [Source:HGNC Symbol;Acc:HGNC:51604]
ENSG00000236892	0.0001	0.0545277	-9.09084	0.648195	1	-	AL357833.2	-
ENSG00000262115	0.0001	0.0544867	-9.08976	0.648195	1	-	AC027601.2	-
ENSG00000183346	0.0001	0.05443	-9.08826	0.403093	1	-	C10orf107	chromosome 10 open reading frame 107 [Source:HGNC Symbol;Acc:HGNC:28678]
ENSG00000225457	0.0001	0.0544027	-9.08753	0.644512	1	-	AC073346.1	-
ENSG00000240254	0.0001	0.054252	-9.08353	0.63951	1	-	B4GALT4-AS1	B4GALT4 antisense RNA 1 [Source:HGNC Symbol;Acc:HGNC:40090]
ENSG00000223949	5.33333e-05	0.028898	-9.08172	0.818654	1	-	ROR1-AS1	ROR1 antisense RNA 1 [Source:HGNC Symbol;Acc:HGNC:40508]
ENSG00000236582	0.0001	0.054144	-9.08066	0.63951	1	-	PRPF38AP2	PRP38 domain containing A pseudogene 2 [Source:HGNC Symbol;Acc:HGNC:44693]
ENSG00000226521	0.0001	0.0540767	-9.07886	0.535162	1	-	AC087499.3	-
ENSG00000007350	0.0001	0.0540573	-9.07835	0.321126	1	-	TKTL1	transketolase like 1 [Source:HGNC Symbol;Acc:HGNC:11835]
ENSG00000267677	0.0001	0.0540153	-9.07723	0.812184	1	-	AC016229.2	-
ENSG00000279536	0.0001	0.053694	-9.06862	0.648195	1	-	AC093458.2	-
ENSG00000249955	0.0001	0.053494	-9.06323	0.63951	1	-	AC084866.1	-
ENSG00000277855	0.0001	0.05349	-9.06313	0.648195	1	-	AC097634.3	-
ENSG00000268714	0.0001	0.0533267	-9.05871	0.812184	1	-	ARL14EPL	ADP ribosylation factor like GTPase 14 effector protein like [Source:HGNC Symbol;Acc:HGNC:44201]
ENSG00000231130	0.0001	0.0532157	-9.05571	0.644512	1	-	HLA-T	major histocompatibility complex, class I, T (pseudogene) [Source:HGNC Symbol;Acc:HGNC:23478]
ENSG00000253282	0.0001	0.0531687	-9.05443	0.644512	1	-	AP001330.1	-
ENSG00000271716	0.0001	0.0531593	-9.05418	0.644512	1	-	AC022001.2	-
ENSG00000237489	0.0001	0.0531013	-9.0526	0.648195	1	-	LINC00959	long intergenic non-protein coding RNA 959 [Source:HGNC Symbol;Acc:HGNC:48677]
ENSG00000170476	0.0001	0.0529057	-9.04728	0.543585	1	-	MZB1	marginal zone B and B1 cell specific protein [Source:HGNC Symbol;Acc:HGNC:30125]
ENSG00000267585	0.0001	0.0528193	-9.04492	0.648195	1	-	AC013290.1	-
ENSG00000259665	0.0001	0.0528037	-9.04449	0.812184	1	-	AC021231.3	-
ENSG00000265394	0.0001	0.0527463	-9.04293	0.812184	1	-	AC104984.2	-
ENSG00000188883	0.0001	0.0527107	-9.04195	0.37867	1	-	KLRG2	killer cell lectin like receptor G2 [Source:HGNC Symbol;Acc:HGNC:24778]
ENSG00000283399	0.0001	0.0526783	-9.04107	0.417024	1	-	AC004381.2	-
ENSG00000226653	0.0001	0.052592	-9.0387	0.648195	1	-	OR13Z1P	olfactory receptor family 13 subfamily Z member 1 pseudogene [Source:HGNC Symbol;Acc:HGNC:31240]
ENSG00000250470	0.0001	0.0525883	-9.0386	0.642001	1	-	AC253536.5	-
ENSG00000232325	0.0001	0.0525387	-9.03724	0.63951	1	-	AC093627.1	-
ENSG00000249234	0.0001	0.0524433	-9.03462	0.812184	1	-	AC108063.1	-
ENSG00000225415	0.0001	0.052439	-9.0345	0.520961	1	-	CCRL1P1	C-C motif chemokine receptor like 1 pseudogene 1 [Source:HGNC Symbol;Acc:HGNC:21142]
ENSG00000281772	0.0001	0.0524137	-9.0338	0.648195	1	-	AC019226.2	-
ENSG00000255326	0.0001	0.0523323	-9.03156	0.644512	1	-	AP001922.5	-
ENSG00000266839	0.0001	0.0522163	-9.02836	0.812184	1	-	AC008088.1	-
ENSG00000216588	0.0001	0.0522143	-9.0283	0.644512	1	-	IGSF23	immunoglobulin superfamily member 23 [Source:HGNC Symbol;Acc:HGNC:40040]
ENSG00000236760	0.0001	0.0521633	-9.02689	0.812184	1	-	AC019118.2	-
ENSG00000251054	0.0001	0.0521627	-9.02687	0.812184	1	-	AC008883.2	-
ENSG00000188050	0.0001	0.052115	-9.02555	0.403093	1	-	RNF133	ring finger protein 133 [Source:HGNC Symbol;Acc:HGNC:21154]
ENSG00000223617	0.0001	0.052005	-9.02251	0.648195	1	-	LINC00370	long intergenic non-protein coding RNA 370 [Source:HGNC Symbol;Acc:HGNC:42692]
ENSG00000200237	0.0001	0.051961	-9.02129	0.812184	1	-	SNORA70	Small nucleolar RNA SNORA70 [Source:RFAM;Acc:RF00156]
ENSG00000241678	0.0001	0.0519407	-9.02072	0.644512	1	-	AC091564.1	-
ENSG00000259011	0.0001	0.0519367	-9.02061	0.648195	1	-	AC016266.1	-
ENSG00000251413	0.0001	0.051919	-9.02012	0.648195	1	-	AC068898.2	-
ENSG00000250956	0.0001	0.0519023	-9.01966	0.812184	1	-	AC011416.2	-
ENSG00000224881	0.0001	0.051888	-9.01926	0.63951	1	-	AC068279.1	-
ENSG00000257883	0.0001	0.05176	-9.01569	0.644512	1	-	AC125603.2	-
ENSG00000239216	0.0001	0.0516957	-9.0139	0.812184	1	-	AL139420.2	-
ENSG00000241657	0.0001	0.0516807	-9.01348	0.812184	1	-	TRBV11-2	T-cell receptor beta variable 11-2 [Source:HGNC Symbol;Acc:HGNC:12181]
ENSG00000230838	0.0001	0.0516627	-9.01298	0.63951	1	-	LINC01614	long intergenic non-protein coding RNA 1614 [Source:HGNC Symbol;Acc:HGNC:51847]
ENSG00000251171	0.0001	0.0516427	-9.01242	0.648195	1	-	AC096741.2	-
ENSG00000256278	0.0001	0.051631	-9.01209	0.535162	1	-	AC048382.1	-
ENSG00000178750	0.0001	0.051513	-9.00879	0.543585	1	-	STX19	syntaxin 19 [Source:HGNC Symbol;Acc:HGNC:19300]
ENSG00000240590	0.0001	0.051508	-9.00865	0.644512	1	-	RPSAP48	ribosomal protein SA pseudogene 48 [Source:HGNC Symbol;Acc:HGNC:36646]
ENSG00000200105	0.0001	0.0513677	-9.00472	0.812184	1	-	RNU6-251P	RNA, U6 small nuclear 251, pseudogene [Source:HGNC Symbol;Acc:HGNC:47214]
ENSG00000261044	0.0001	0.051341	-9.00397	0.648195	1	-	AP006547.1	-
ENSG00000225347	0.0001	0.05131	-9.0031	0.63951	1	-	SLC25A5P8	solute carrier family 25 member 5 pseudogene 8 [Source:HGNC Symbol;Acc:HGNC:35469]
ENSG00000232015	0.0001	0.0512597	-9.00168	0.812184	1	-	HSPE1P25	heat shock protein family E (Hsp10) member 1 pseudogene 25 [Source:HGNC Symbol;Acc:HGNC:49344]
ENSG00000240787	0.0001	0.0511897	-8.99971	0.812184	1	-	AC092916.2	-
ENSG00000214313	0.0001	0.0510827	-8.99669	0.63951	1	-	AZGP1P1	alpha-2-glycoprotein 1, zinc-binding pseudogene 1 [Source:HGNC Symbol;Acc:HGNC:911]
ENSG00000236035	0.0001	0.0510713	-8.99637	0.644512	1	-	AL513343.1	-
ENSG00000224215	0.0001	0.0509667	-8.99341	0.63951	1	-	AL606469.1	-
ENSG00000253273	0.0001	0.0508153	-8.98912	0.644512	1	-	AC022826.1	-
ENSG00000272797	0.0001	0.050764	-8.98766	0.812184	1	-	AC092954.1	-
ENSG00000226317	0.0001	0.0507463	-8.98716	0.63951	1	-	LINC00351	long intergenic non-protein coding RNA 351 [Source:HGNC Symbol;Acc:HGNC:42669]
ENSG00000225761	0.0001	0.050665	-8.98485	0.812184	1	-	AL596247.1	-
ENSG00000232841	0.0001	0.0506097	-8.98327	0.812184	1	-	BRWD1P3	bromodomain and WD repeat domain containing 1 pseudogene 3 [Source:HGNC Symbol;Acc:HGNC:51530]
ENSG00000227583	0.0001	0.0506053	-8.98315	0.644512	1	-	RPS3AP37	ribosomal protein S3a pseudogene 37 [Source:HGNC Symbol;Acc:HGNC:36691]
ENSG00000236243	0.0001	0.0505383	-8.98123	0.648195	1	-	RPL6P29	ribosomal protein L6 pseudogene 29 [Source:HGNC Symbol;Acc:HGNC:36382]
ENSG00000277817	0.0001	0.0502583	-8.97322	0.812184	1	-	MIR6738	microRNA 6738 [Source:HGNC Symbol;Acc:HGNC:49939]
ENSG00000257599	0.0001	0.0502393	-8.97267	0.535162	1	-	OVCH1-AS1	OVCH1 antisense RNA 1 [Source:HGNC Symbol;Acc:HGNC:44484]
ENSG00000261714	0.0001	0.050137	-8.96973	0.63951	1	-	AC105137.2	-
ENSG00000280103	0.0001	0.050119	-8.96921	0.812184	1	-	AC007792.1	-
ENSG00000226535	0.0001	0.0500823	-8.96816	0.341316	1	-	AL445487.1	-
ENSG00000237378	0.0001	0.050009	-8.96604	0.642001	1	-	AL445989.1	-
ENSG00000276103	0.0001	0.049985	-8.96535	0.812184	1	-	U4	U4 spliceosomal RNA [Source:RFAM;Acc:RF00015]
ENSG00000226480	0.0001	0.0499747	-8.96505	0.63951	1	-	OR7H1P	olfactory receptor family 7 subfamily H member 1 pseudogene [Source:HGNC Symbol;Acc:HGNC:8468]
ENSG00000225730	0.0001	0.0499693	-8.9649	0.648195	1	-	AL096772.1	-
ENSG00000225680	0.0001	0.049963	-8.96472	0.648195	1	-	AL163953.1	-
ENSG00000187862	0.0001	0.0498267	-8.96077	0.644512	1	-	TTC24	tetratricopeptide repeat domain 24 [Source:HGNC Symbol;Acc:HGNC:32348]
ENSG00000270806	0.0001	0.049802	-8.96006	0.644512	1	-	C17orf50	chromosome 17 open reading frame 50 [Source:HGNC Symbol;Acc:HGNC:29581]
ENSG00000260161	0.0001	0.049794	-8.95983	0.535162	1	-	MTCYBP28	mitochondrially encoded cytochrome b pseudogene 28 [Source:HGNC Symbol;Acc:HGNC:51994]
ENSG00000250167	0.0001	0.049778	-8.95936	0.63951	1	-	AC034206.1	-
ENSG00000250098	0.0001	0.0497777	-8.95935	0.812184	1	-	AC007370.1	-
ENSG00000183831	0.0001	0.049715	-8.95754	0.47456	1	-	ANKRD45	ankyrin repeat domain 45 [Source:HGNC Symbol;Acc:HGNC:24786]
ENSG00000224302	0.0001	0.0496813	-8.95656	0.812184	1	-	AL500527.1	-
ENSG00000090534	0.0001	0.049678	-8.95646	0.466529	1	-	THPO	thrombopoietin [Source:HGNC Symbol;Acc:HGNC:11795]
ENSG00000248777	0.0001	0.0495097	-8.95157	0.63951	1	-	AC006499.1	-
ENSG00000270479	0.0001	0.0494667	-8.95031	0.644512	1	-	BNIP3P37	BCL2 interacting protein 3 pseudogene 37 [Source:HGNC Symbol;Acc:HGNC:49717]
ENSG00000250516	0.0001	0.049227	-8.94331	0.63951	1	-	AC021678.1	-
ENSG00000226428	0.0001	0.049217	-8.94301	0.516978	1	-	RPL15P13	ribosomal protein L15 pseudogene 13 [Source:HGNC Symbol;Acc:HGNC:35915]
ENSG00000226926	0.0001	0.0492	-8.94251	0.47456	1	-	PDZPH1P	PDZ and pleckstrin homology domains 1, pseudogene [Source:HGNC Symbol;Acc:HGNC:51488]
ENSG00000238554	0.0001	0.049196	-8.9424	0.812184	1	-	RNU1-88P	RNA, U1 small nuclear 88, pseudogene [Source:HGNC Symbol;Acc:HGNC:48430]
ENSG00000231704	0.0001	0.0491933	-8.94232	0.63951	1	-	AC004895.1	-
ENSG00000224095	0.0001	0.049173	-8.94172	0.812184	1	-	LINC01935	long intergenic non-protein coding RNA 1935 [Source:HGNC Symbol;Acc:HGNC:52758]
ENSG00000257183	0.0001	0.0488927	-8.93347	0.644512	1	-	AC090502.3	-
ENSG00000220349	0.0001	0.0488693	-8.93279	0.644512	1	-	Z85996.1	-
ENSG00000253865	0.0001	0.048802	-8.9308	0.644512	1	-	AC131025.1	-
ENSG00000182109	0.0001	0.0487727	-8.92993	0.535162	1	-	AL365277.1	-
ENSG00000266306	0.0001	0.0486	-8.92481	0.40894	1	-	AC061975.5	-
ENSG00000220614	0.0001	0.0485933	-8.92461	0.812184	1	-	AL583834.1	-
ENSG00000255693	0.0001	0.048532	-8.92279	0.543585	1	-	LINC02389	long intergenic non-protein coding RNA 2389 [Source:HGNC Symbol;Acc:HGNC:53316]
ENSG00000201444	0.0001	0.048501	-8.92187	0.812184	1	-	RNU6-1082P	RNA, U6 small nuclear 1082, pseudogene [Source:HGNC Symbol;Acc:HGNC:48045]
ENSG00000219294	0.0001	0.0483823	-8.91834	0.47456	1	-	PIP5K1P1	phosphatidylinositol-4-phosphate 5-kinase type 1 pseudogene 1 [Source:HGNC Symbol;Acc:HGNC:28372]
ENSG00000230498	0.0001	0.0482123	-8.91326	0.644512	1	-	AL035409.1	-
ENSG00000265296	0.0001	0.0481697	-8.91198	0.212391	1	-	AP005212.1	-
ENSG00000162882	0.0001	0.048145	-8.91124	0.648195	1	-	HAAO	3-hydroxyanthranilate 3,4-dioxygenase [Source:HGNC Symbol;Acc:HGNC:4796]
ENSG00000234534	0.0001	0.0479483	-8.90534	0.644512	1	-	CSNK1G2P1	casein kinase 1 gamma 2 pseudogene 1 [Source:HGNC Symbol;Acc:HGNC:49739]
ENSG00000236986	0.0001	0.047943	-8.90518	0.340029	1	-	AL157938.2	-
ENSG00000223831	0.0001	0.0478793	-8.90326	0.812184	1	-	AC005006.1	-
ENSG00000282943	0.0001	0.047858	-8.90262	0.47456	1	-	AC004784.1	-
ENSG00000265942	0.0001	0.047856	-8.90256	0.812184	1	-	RN7SL577P	RNA, 7SL, cytoplasmic 577, pseudogene [Source:HGNC Symbol;Acc:HGNC:46593]
ENSG00000264735	0.0001	0.047798	-8.90081	0.644512	1	-	AC145207.7	-
ENSG00000254526	0.0001	0.0477833	-8.90036	0.63951	1	-	AC090791.1	-
ENSG00000142233	0.0001	0.0477797	-8.90025	0.47456	1	-	NTN5	netrin 5 [Source:HGNC Symbol;Acc:HGNC:25208]
ENSG00000225502	0.0001	0.047737	-8.89896	0.63951	1	-	GAPDHP16	glyceraldehyde-3-phosphate dehydrogenase pseudogene 16 [Source:HGNC Symbol;Acc:HGNC:23768]
ENSG00000201229	0.0001	0.0477053	-8.89801	0.812184	1	-	SNORA63D	small nucleolar RNA, H/ACA box 63D [Source:HGNC Symbol;Acc:HGNC:52211]
ENSG00000184984	0.0001	0.0475923	-8.89459	0.0157334	1	-	CHRM5	cholinergic receptor muscarinic 5 [Source:HGNC Symbol;Acc:HGNC:1954]
ENSG00000257475	0.0001	0.047546	-8.89318	0.63951	1	-	AC068888.2	-
ENSG00000226874	0.0001	0.0475223	-8.89246	0.812184	1	-	AC005154.2	-
ENSG00000225235	0.0001	0.047307	-8.88591	0.812184	1	-	INTS6L-AS1	INTS6L antisense RNA 1 [Source:HGNC Symbol;Acc:HGNC:41180]
ENSG00000232721	0.0001	0.047305	-8.88585	0.385951	1	-	AC239800.2	-
ENSG00000274594	0.0001	0.0471297	-8.88049	0.812184	1	-	AL391669.1	-
ENSG00000253047	0.0001	0.0471243	-8.88033	0.812184	1	-	SNORA40	Small nucleolar RNA SNORA40 [Source:RFAM;Acc:RF00561]
ENSG00000277563	0.0001	0.0471237	-8.88031	0.812184	1	-	AC063961.1	-
ENSG00000254270	0.0001	0.0468197	-8.87097	0.812184	1	-	ERHP1	enhancer of rudimentary homolog (Drosophila) pseudogene 1 [Source:HGNC Symbol;Acc:HGNC:41916]
ENSG00000249148	0.0001	0.0467527	-8.8689	0.812184	1	-	AC006445.2	-
ENSG00000261645	0.0001	0.0467357	-8.86838	0.535162	1	-	DISC1FP1	DISC1 fusion partner 1 (non-protein coding) [Source:HGNC Symbol;Acc:HGNC:33625]
ENSG00000101292	0.0001	0.0467297	-8.86819	0.521603	1	-	PROKR2	prokineticin receptor 2 [Source:HGNC Symbol;Acc:HGNC:15836]
ENSG00000226048	0.0001	0.046513	-8.86149	0.648195	1	-	YBX1P8	Y-box binding protein 1 pseudogene 8 [Source:HGNC Symbol;Acc:HGNC:42429]
ENSG00000174332	0.0001	0.0464837	-8.86058	0.355116	1	-	GLIS1	GLIS family zinc finger 1 [Source:HGNC Symbol;Acc:HGNC:29525]
ENSG00000224667	0.0001	0.046384	-8.85748	0.812184	1	-	AC013470.1	-
ENSG00000257845	0.0001	0.0463643	-8.85687	0.812184	1	-	LINC02294	long intergenic non-protein coding RNA 2294 [Source:HGNC Symbol;Acc:HGNC:53210]
ENSG00000277135	0.0001	0.0463427	-8.8562	0.63951	1	-	AC012409.3	-
ENSG00000236528	0.0001	0.0463347	-8.85595	0.63951	1	-	AL033528.2	-
ENSG00000254686	0.0001	0.046275	-8.85409	0.812184	1	-	AL138812.1	-
ENSG00000226443	0.0001	0.0461687	-8.85077	0.63951	1	-	GAPDHP32	glyceraldehyde 3 phosphate dehydrogenase pseudogene 32 [Source:HGNC Symbol;Acc:HGNC:37784]
ENSG00000235209	0.0001	0.0461477	-8.85011	0.648195	1	-	AL022318.1	-
ENSG00000213169	0.0001	0.0461403	-8.84988	0.642001	1	-	AC069218.1	-
ENSG00000249555	0.0001	0.0461217	-8.8493	0.648195	1	-	TMEM248P1	transmembrane protein 248 pseudogene 1 [Source:HGNC Symbol;Acc:HGNC:44053]
ENSG00000258999	0.0001	0.0460893	-8.84829	0.648195	1	-	AL136040.1	-
ENSG00000201428	0.0001	0.0460787	-8.84796	0.812184	1	-	RN7SKP71	RNA, 7SK small nuclear pseudogene 71 [Source:HGNC Symbol;Acc:HGNC:45795]
ENSG00000254013	0.0001	0.0460217	-8.84617	0.403093	1	-	AC044849.1	-
ENSG00000203730	0.0001	0.045967	-8.84445	0.385951	1	-	TEDDM1	transmembrane epididymal protein 1 [Source:HGNC Symbol;Acc:HGNC:30233]
ENSG00000255361	0.0001	0.0459413	-8.84365	0.63951	1	-	AC103843.2	-
ENSG00000066336	0.0001	0.045926	-8.84317	0.40894	1	-	SPI1	Spi-1 proto-oncogene [Source:HGNC Symbol;Acc:HGNC:11241]
ENSG00000240253	0.0001	0.045901	-8.84238	0.812184	1	-	FAR2P3	fatty acyl-CoA reductase 2 pseudogene 3 [Source:HGNC Symbol;Acc:HGNC:49285]
ENSG00000165548	0.0001	0.045893	-8.84213	0.63951	1	-	TMEM63C	transmembrane protein 63C [Source:HGNC Symbol;Acc:HGNC:23787]
ENSG00000176998	0.0001	0.0458823	-8.84179	0.644512	1	-	HCG4	HLA complex group 4 (non-protein coding) [Source:HGNC Symbol;Acc:HGNC:21241]
ENSG00000279263	0.0001	0.0457983	-8.83915	0.63951	1	-	OR2L8	olfactory receptor family 2 subfamily L member 8 (gene/pseudogene) [Source:HGNC Symbol;Acc:HGNC:15014]
ENSG00000251258	0.0001	0.0457857	-8.83875	0.47456	1	-	RFPL4B	ret finger protein like 4B [Source:HGNC Symbol;Acc:HGNC:33264]
ENSG00000235570	0.0001	0.0456963	-8.83593	0.63951	1	-	LINC00533	long intergenic non-protein coding RNA 533 [Source:HGNC Symbol;Acc:HGNC:18690]
ENSG00000242173	0.0001	0.045678	-8.83536	0.644512	1	-	ARHGDIG	Rho GDP dissociation inhibitor gamma [Source:HGNC Symbol;Acc:HGNC:680]
ENSG00000207784	0.0001	0.0456333	-8.83394	0.812184	1	-	MIR542	microRNA 542 [Source:HGNC Symbol;Acc:HGNC:32534]
ENSG00000218561	0.0001	0.0455753	-8.83211	0.812184	1	-	AL353133.1	-
ENSG00000149300	0.0001	0.0455483	-8.83125	0.63951	1	-	C11orf52	chromosome 11 open reading frame 52 [Source:HGNC Symbol;Acc:HGNC:30531]
ENSG00000122592	0.0001	0.0455133	-8.83015	0.466529	1	-	HOXA7	homeobox A7 [Source:HGNC Symbol;Acc:HGNC:5108]
ENSG00000188032	0.0001	0.0455053	-8.82989	0.535162	1	-	C19orf67	chromosome 19 open reading frame 67 [Source:HGNC Symbol;Acc:HGNC:34354]
ENSG00000183662	0.0001	0.0454723	-8.82885	0.471148	1	-	FAM19A1	family with sequence similarity 19 member A1, C-C motif chemokine like [Source:HGNC Symbol;Acc:HGNC:21587]
ENSG00000283673	0.0001	0.045466	-8.82864	0.812184	1	-	MIR4531	microRNA 4531 [Source:HGNC Symbol;Acc:HGNC:41872]
ENSG00000257653	0.0001	0.0453737	-8.82571	0.648195	1	-	AC117498.1	-
ENSG00000253666	0.0001	0.0453503	-8.82497	0.644512	1	-	AP000424.1	-
ENSG00000260172	0.0001	0.0452287	-8.82109	0.63951	1	-	LINC01413	long intergenic non-protein coding RNA 1413 [Source:HGNC Symbol;Acc:HGNC:50705]
ENSG00000269742	0.0001	0.0452123	-8.82057	0.643821	1	-	BNIP3P29	BCL2 interacting protein 3 pseudogene 29 [Source:HGNC Symbol;Acc:HGNC:49709]
ENSG00000259225	0.0001	0.0451767	-8.81943	0.543585	1	-	LINC02345	long intergenic non-protein coding RNA 2345 [Source:HGNC Symbol;Acc:HGNC:53267]
ENSG00000235784	0.0001	0.0451483	-8.81853	0.644512	1	-	HNRNPA1P29	heterogeneous nuclear ribonucleoprotein A1 pseudogene 29 [Source:HGNC Symbol;Acc:HGNC:39547]
ENSG00000273375	0.0001	0.044953	-8.81227	0.648195	1	-	AC055764.2	-
ENSG00000255374	0.0001	0.044865	-8.80945	0.63951	1	-	TAS2R43	taste 2 receptor member 43 [Source:HGNC Symbol;Acc:HGNC:18875]
ENSG00000265407	0.0001	0.0447967	-8.80725	0.812184	1	-	MIR4324	microRNA 4324 [Source:HGNC Symbol;Acc:HGNC:38392]
ENSG00000175746	0.0001	0.0447667	-8.80628	0.260353	1	-	C15orf54	chromosome 15 open reading frame 54 [Source:HGNC Symbol;Acc:HGNC:33797]
ENSG00000276030	0.0001	0.0447463	-8.80563	0.812184	1	-	AC073534.2	-
ENSG00000229060	0.0001	0.0446303	-8.80188	0.644512	1	-	AL451124.1	-
ENSG00000267334	0.0001	0.0445433	-8.79907	0.644512	1	-	AC015936.1	-
ENSG00000189186	0.0001	0.0444573	-8.79628	0.405532	1	-	DCAF8L2	DDB1 and CUL4 associated factor 8 like 2 [Source:HGNC Symbol;Acc:HGNC:31811]
ENSG00000260185	0.0001	0.0444423	-8.79579	0.812184	1	-	AC009097.1	-
ENSG00000227700	0.0001	0.0444127	-8.79483	0.812184	1	-	AC239809.2	-
ENSG00000255074	0.0001	0.0443967	-8.79431	0.812184	1	-	AC018523.1	-
ENSG00000213630	0.0001	0.0443553	-8.79296	0.812184	1	-	BOLA3P3	bolA family member 3 pseudogene 3 [Source:HGNC Symbol;Acc:HGNC:51442]
ENSG00000267710	0.0001	0.0443343	-8.79228	0.648195	1	-	EDDM13	epididymal protein 13 [Source:HGNC Symbol;Acc:HGNC:53168]
ENSG00000259797	0.0001	0.0443317	-8.79219	0.812184	1	-	AC020978.2	-
ENSG00000210678	0.0001	0.044216	-8.78842	0.812184	1	-	RNU6ATAC2P	RNA, U6atac small nuclear 2, pseudogene [Source:HGNC Symbol;Acc:HGNC:34092]
ENSG00000261856	0.0001	0.0442077	-8.78815	0.644512	1	-	LINC02186	long intergenic non-protein coding RNA 2186 [Source:HGNC Symbol;Acc:HGNC:53048]
ENSG00000248909	0.0001	0.044159	-8.78656	0.521603	1	-	HMGB1P21	high mobility group box 1 pseudogene 21 [Source:HGNC Symbol;Acc:HGNC:39106]
ENSG00000281100	0.0001	0.0439043	-8.77822	0.466529	1	-	AC105749.1	-
ENSG00000255130	0.0001	0.043848	-8.77637	0.644512	1	-	AC022874.1	-
ENSG00000214041	0.0001	0.0438237	-8.77557	0.63951	1	-	PGAM1P4	phosphoglycerate mutase 1 pseudogene 4 [Source:HGNC Symbol;Acc:HGNC:42451]
ENSG00000219329	0.0001	0.0437967	-8.77468	0.646348	1	-	AL357515.1	-
ENSG00000233040	0.0001	0.0436007	-8.76821	0.63951	1	-	FAM204BP	family with sequence similarity 204 member B, pseudogene [Source:HGNC Symbol;Acc:HGNC:42011]
ENSG00000112619	0.0001	0.0435277	-8.76579	0.385951	1	-	PRPH2	peripherin 2 [Source:HGNC Symbol;Acc:HGNC:9942]
ENSG00000187988	0.0001	0.043524	-8.76567	0.543585	1	-	KCTD9P3	potassium channel tetramerization domain containing 9 pseudogene 3 [Source:HGNC Symbol;Acc:HGNC:49912]
ENSG00000143318	0.0001	0.043505	-8.76504	0.40894	1	-	CASQ1	calsequestrin 1 [Source:HGNC Symbol;Acc:HGNC:1512]
ENSG00000144550	0.0001	0.0434903	-8.76455	0.405532	1	-	CPNE9	copine family member 9 [Source:HGNC Symbol;Acc:HGNC:24336]
ENSG00000232101	0.0001	0.0434657	-8.76373	0.812184	1	-	AC108059.2	-
ENSG00000229005	0.0001	0.0432113	-8.75527	0.812184	1	-	HNF4A-AS1	HNF4A antisense RNA 1 [Source:HGNC Symbol;Acc:HGNC:49505]
ENSG00000105369	0.0001	0.04318	-8.75422	0.535162	1	-	CD79A	CD79a molecule [Source:HGNC Symbol;Acc:HGNC:1698]
ENSG00000223290	0.0001	0.0431427	-8.75297	0.812184	1	-	RNA5SP107	RNA, 5S ribosomal pseudogene 107 [Source:HGNC Symbol;Acc:HGNC:42905]
ENSG00000180697	0.0001	0.0431083	-8.75182	0.471148	1	-	C3orf22	chromosome 3 open reading frame 22 [Source:HGNC Symbol;Acc:HGNC:28534]
ENSG00000236928	0.0001	0.043066	-8.75041	0.812184	1	-	AC008267.4	-
ENSG00000128242	0.0001	0.0430647	-8.75036	0.47456	1	-	GAL3ST1	galactose-3-O-sulfotransferase 1 [Source:HGNC Symbol;Acc:HGNC:24240]
ENSG00000213081	0.0001	0.0430213	-8.74891	0.63951	1	-	AC012362.1	-
ENSG00000198732	0.0001	0.0430017	-8.74825	0.47456	1	-	SMOC1	SPARC related modular calcium binding 1 [Source:HGNC Symbol;Acc:HGNC:20318]
ENSG00000272701	0.0001	0.0429667	-8.74707	0.184825	1	-	AC007938.4	-
ENSG00000228986	0.0001	0.0429353	-8.74602	0.63951	1	-	AC234781.3	-
ENSG00000235191	0.0001	0.0429143	-8.74532	0.812184	1	-	NUCB1-AS1	NUCB1 antisense RNA 1 [Source:HGNC Symbol;Acc:HGNC:40419]
ENSG00000226665	0.0001	0.0429143	-8.74532	0.648195	1	-	SSR1P2	signal sequence receptor subunit 1 pseudogene 2 [Source:HGNC Symbol;Acc:HGNC:39274]
ENSG00000236799	0.0001	0.0428933	-8.74461	0.812184	1	-	AL355340.1	-
ENSG00000250889	0.0001	0.0428753	-8.744	0.812184	1	-	LINC01336	long intergenic non-protein coding RNA 1336 [Source:HGNC Symbol;Acc:HGNC:50543]
ENSG00000233366	0.0001	0.042862	-8.74356	0.63951	1	-	ZNF90P2	zinc finger protein 90 pseudogene 2 [Source:HGNC Symbol;Acc:HGNC:21687]
ENSG00000257408	0.0001	0.042789	-8.7411	0.63951	1	-	AC092375.1	-
ENSG00000224606	0.0001	0.04271	-8.73843	0.812184	1	-	TGFA-IT1	TGFA intronic transcript 1 [Source:HGNC Symbol;Acc:HGNC:41389]
ENSG00000249379	0.0001	0.0426967	-8.73798	0.63951	1	-	AL033397.2	-
ENSG00000276087	0.0001	0.0426643	-8.73689	0.327637	1	-	AC008073.3	-
ENSG00000261191	0.0001	0.0426153	-8.73523	0.644512	1	-	AC013640.1	-
ENSG00000176907	0.0001	0.042596	-8.73457	0.40894	1	-	C8orf4	chromosome 8 open reading frame 4 [Source:HGNC Symbol;Acc:HGNC:1357]
ENSG00000226917	0.0001	0.0425437	-8.7328	0.644512	1	-	LINC01276	long intergenic non-protein coding RNA 1276 [Source:HGNC Symbol;Acc:HGNC:50333]
ENSG00000233671	0.0001	0.042536	-8.73254	0.516978	1	-	AC083899.2	-
ENSG00000269463	0.000208333	0.0884933	-8.73053	0.597079	1	-	AP001160.4	-
ENSG00000279600	0.0001	0.0424573	-8.72987	0.812184	1	-	AC015804.1	-
ENSG00000176840	0.0001	0.0424293	-8.72892	0.644512	1	-	MIR7-3HG	MIR7-3 host gene [Source:HGNC Symbol;Acc:HGNC:30049]
ENSG00000274927	0.0001	0.042351	-8.72625	0.520961	1	-	AC239859.5	-
ENSG00000256234	0.0001	0.042326	-8.7254	0.644512	1	-	AC022509.2	-
ENSG00000102678	0.0001	0.0422913	-8.72422	0.323055	1	-	FGF9	fibroblast growth factor 9 [Source:HGNC Symbol;Acc:HGNC:3687]
ENSG00000255583	0.0001	0.0421983	-8.72104	0.385951	1	-	AC084357.3	-
ENSG00000261121	0.0001	0.0421653	-8.71991	0.341316	1	-	LINC02473	long intergenic non-protein coding RNA 2473 [Source:HGNC Symbol;Acc:HGNC:53412]
ENSG00000215875	0.0001	0.042136	-8.71891	0.644512	1	-	ST13P20	ST13, Hsp70 interacting protein pseudogene 20 [Source:HGNC Symbol;Acc:HGNC:38863]
ENSG00000204614	0.0001	0.0420537	-8.71609	0.47456	1	-	TRIM40	tripartite motif containing 40 [Source:HGNC Symbol;Acc:HGNC:18736]
ENSG00000237361	0.0001	0.0419737	-8.71334	0.644512	1	-	TUSC8	tumor suppressor candidate 8 (non-protein coding) [Source:HGNC Symbol;Acc:HGNC:49111]
ENSG00000198738	0.0001	0.0418903	-8.71047	0.812184	1	-	SMIM11P1	small integral membrane protein 11 pseudogene 1 [Source:HGNC Symbol;Acc:HGNC:21400]
ENSG00000254506	0.0001	0.0418643	-8.70958	0.648195	1	-	AP003080.1	-
ENSG00000214855	0.0001	0.041838	-8.70867	0.63951	1	-	APOC1P1	apolipoprotein C1 pseudogene 1 [Source:HGNC Symbol;Acc:HGNC:608]
ENSG00000257346	0.0001	0.041769	-8.70629	0.644512	1	-	AC011603.1	-
ENSG00000280085	0.0001	0.0417523	-8.70571	0.812184	1	-	AP001002.3	-
ENSG00000235974	0.0001	0.0416937	-8.70368	0.648195	1	-	VN2R19P	vomeronasal 2 receptor 19 pseudogene [Source:HGNC Symbol;Acc:HGNC:33225]
ENSG00000234026	0.0001	0.0416257	-8.70133	0.644512	1	-	AL157834.2	-
ENSG00000206026	0.0001	0.041572	-8.69947	0.466529	1	-	SMIM21	small integral membrane protein 21 [Source:HGNC Symbol;Acc:HGNC:27598]
ENSG00000262880	0.0001	0.041546	-8.69857	0.32237	1	-	AC113189.2	-
ENSG00000228085	0.0001	0.0415037	-8.69709	0.812184	1	-	AC009296.1	-
ENSG00000252994	0.0001	0.0414933	-8.69674	0.812184	1	-	RNU6-1231P	RNA, U6 small nuclear 1231, pseudogene [Source:HGNC Symbol;Acc:HGNC:48194]
ENSG00000224328	0.0001	0.0413493	-8.69172	0.63951	1	-	MDC1-AS1	MDC1 antisense RNA 1 [Source:HGNC Symbol;Acc:HGNC:39764]
ENSG00000204246	0.0001	0.0413273	-8.69095	0.644512	1	-	OR13C3	olfactory receptor family 13 subfamily C member 3 [Source:HGNC Symbol;Acc:HGNC:14704]
ENSG00000228677	0.0001	0.0413243	-8.69085	0.644512	1	-	TTC3-AS1	TTC3 antisense RNA 1 [Source:HGNC Symbol;Acc:HGNC:40595]
ENSG00000250913	0.0001	0.0412543	-8.6884	0.812184	1	-	USP17L23	ubiquitin specific peptidase 17-like family member 23 [Source:HGNC Symbol;Acc:HGNC:44451]
ENSG00000188820	0.0001	0.0412503	-8.68826	0.63951	1	-	FAM26F	family with sequence similarity 26 member F [Source:HGNC Symbol;Acc:HGNC:33391]
ENSG00000272923	0.0001	0.041187	-8.68605	0.644512	1	-	AC092139.2	-
ENSG00000243709	0.000340667	0.140221	-8.68513	0.206939	1	-	LEFTY1	left-right determination factor 1 [Source:HGNC Symbol;Acc:HGNC:6552]
ENSG00000203262	0.0001	0.0409777	-8.67869	0.644512	1	-	AL137845.1	-
ENSG00000244623	0.0001	0.040954	-8.67786	0.648195	1	-	OR2AE1	olfactory receptor family 2 subfamily AE member 1 [Source:HGNC Symbol;Acc:HGNC:15087]
ENSG00000180532	0.0001	0.0409027	-8.67605	0.403093	1	-	ZSCAN4	zinc finger and SCAN domain containing 4 [Source:HGNC Symbol;Acc:HGNC:23709]
ENSG00000272908	0.0001	0.0408737	-8.67503	0.471148	1	-	AC006033.2	-
ENSG00000254187	0.0001	0.0408567	-8.67443	0.63951	1	-	AC008708.2	-
ENSG00000131050	0.0001	0.0408117	-8.67284	0.644512	1	-	BPIFA2	BPI fold containing family A member 2 [Source:HGNC Symbol;Acc:HGNC:16203]
ENSG00000121381	0.0001	0.0408017	-8.67248	0.648195	1	-	TAS2R9	taste 2 receptor member 9 [Source:HGNC Symbol;Acc:HGNC:14917]
ENSG00000233524	0.0001	0.0406297	-8.66639	0.63951	1	-	RANP8	RAN, member RAS oncogene family pseudogene 8 [Source:HGNC Symbol;Acc:HGNC:39863]
ENSG00000230140	0.0001	0.0406107	-8.66571	0.812184	1	-	AC016738.2	-
ENSG00000273972	0.0001	0.040583	-8.66473	0.648195	1	-	AC068722.2	-
ENSG00000236478	0.0001	0.0405247	-8.66266	0.63951	1	-	AC012513.2	-
ENSG00000199023	0.0001	0.04044	-8.65964	0.812184	1	-	MIR339	microRNA 339 [Source:HGNC Symbol;Acc:HGNC:31776]
ENSG00000258122	0.0001	0.0403433	-8.65619	0.812184	1	-	AC044802.2	-
ENSG00000280242	0.0001	0.040298	-8.65456	0.812184	1	-	AL450226.2	-
ENSG00000249198	0.0001	0.040295	-8.65446	0.812184	1	-	AC106822.1	-
ENSG00000229990	0.0001	0.0402873	-8.65418	0.644512	1	-	AC022400.2	-
ENSG00000262265	0.0001	0.0402803	-8.65393	0.812184	1	-	AC002558.3	-
ENSG00000264744	0.0001	0.040279	-8.65388	0.812184	1	-	MIR3689C	microRNA 3689c [Source:HGNC Symbol;Acc:HGNC:41816]
ENSG00000274664	0.0001	0.0402757	-8.65376	0.812184	1	-	AP005019.2	-
ENSG00000237863	0.0001	0.0402127	-8.65151	0.63951	1	-	AL035425.1	-
ENSG00000115488	0.0001	0.0400617	-8.64608	0.644512	1	-	NEU2	neuraminidase 2 [Source:HGNC Symbol;Acc:HGNC:7759]
ENSG00000227301	0.0001	0.040027	-8.64483	0.644512	1	-	AL356489.1	-
ENSG00000178412	0.0001	0.0399943	-8.64365	0.644512	1	-	AC068473.1	-
ENSG00000255730	0.0001	0.0398127	-8.63708	0.643821	1	-	AC011462.1	-
ENSG00000186007	0.0001	0.039749	-8.63477	0.812184	1	-	LEMD1	LEM domain containing 1 [Source:HGNC Symbol;Acc:HGNC:18725]
ENSG00000238755	0.0001	0.039708	-8.63329	0.409994	1	-	LINC02006	long intergenic non-protein coding RNA 2006 [Source:HGNC Symbol;Acc:HGNC:52842]
ENSG00000236405	0.0001	0.0397013	-8.63304	0.521603	1	-	UBQLN1P1	ubiquilin 1 pseudogene 1 [Source:HGNC Symbol;Acc:HGNC:21633]
ENSG00000165120	0.0001	0.039623	-8.63019	0.63951	1	-	SSMEM1	serine rich single-pass membrane protein 1 [Source:HGNC Symbol;Acc:HGNC:29580]
ENSG00000249516	0.0001	0.039432	-8.62322	0.648195	1	-	PRELID3BP6	PRELI domain containing 3B pseudogene 6 [Source:HGNC Symbol;Acc:HGNC:49068]
ENSG00000252486	0.0001	0.0393817	-8.62138	0.812184	1	-	Y_RNA	Y RNA [Source:RFAM;Acc:RF00019]
ENSG00000197993	0.0001	0.039317	-8.61901	0.327637	1	-	KEL	Kell blood group, metallo-endopeptidase [Source:HGNC Symbol;Acc:HGNC:6308]
ENSG00000254924	0.0001	0.039293	-8.61813	0.812184	1	-	AP000867.2	-
ENSG00000267412	0.0001	0.0391687	-8.61356	0.520961	1	-	AC092068.2	-
ENSG00000267554	0.0001	0.0391623	-8.61332	0.812184	1	-	AC015911.8	-
ENSG00000178734	0.0001	0.0391073	-8.6113	0.644512	1	-	LMO7DN	LMO7 downstream neighbor [Source:HGNC Symbol;Acc:HGNC:44370]
ENSG00000214626	0.0001	0.0389377	-8.60502	0.644512	1	-	POLR3DP1	RNA polymerase III subunit D pseudogene 1 [Source:HGNC Symbol;Acc:HGNC:45107]
ENSG00000257194	0.0001	0.038841	-8.60144	0.648195	1	-	AC126178.1	-
ENSG00000240095	0.0001	0.038731	-8.59734	0.648195	1	-	AC055758.1	-
ENSG00000186265	0.0001	0.038717	-8.59682	0.382855	1	-	BTLA	B and T lymphocyte associated [Source:HGNC Symbol;Acc:HGNC:21087]
ENSG00000279418	0.0001	0.0384	-8.58496	0.648195	1	-	LINC00244	long intergenic non-protein coding RNA 244 [Source:HGNC Symbol;Acc:HGNC:13245]
ENSG00000284266	0.0001	0.038397	-8.58485	0.812184	1	-	MIR4534	microRNA 4534 [Source:HGNC Symbol;Acc:HGNC:41692]
ENSG00000229146	0.0001	0.0382957	-8.58104	0.644512	1	-	SNX18P4	sorting nexin 18 pseudogene 4 [Source:HGNC Symbol;Acc:HGNC:39612]
ENSG00000267275	0.0001	0.038263	-8.57981	0.644512	1	-	AC020911.2	-
ENSG00000269136	0.0001	0.0382507	-8.57934	0.63951	1	-	BRI3BPP1	BRI3 binding protein pseudogene 1 [Source:HGNC Symbol;Acc:HGNC:51482]
ENSG00000231105	0.0001	0.0382353	-8.57876	0.321126	1	-	AL031728.1	-
ENSG00000255541	0.0001	0.0382073	-8.57771	0.643821	1	-	AP000873.5	-
ENSG00000275905	0.0001	0.0380797	-8.57288	0.812184	1	-	AP003789.1	-
ENSG00000182921	0.0001	0.0380763	-8.57275	0.648195	1	-	CCDC75P1	coiled-coil domain containing 75 pseudogene 1 [Source:HGNC Symbol;Acc:HGNC:42659]
ENSG00000224224	0.0001	0.0380437	-8.57151	0.40196	1	-	HAUS1P2	HAUS augmin like complex subunit 1 pseudogene 2 [Source:HGNC Symbol;Acc:HGNC:43761]
ENSG00000267310	0.0001	0.0380283	-8.57093	0.63951	1	-	OR4G1P	olfactory receptor family 4 subfamily G member 1 pseudogene [Source:HGNC Symbol;Acc:HGNC:8302]
ENSG00000258433	0.0001	0.038022	-8.57069	0.63951	1	-	AC087633.1	-
ENSG00000269475	0.0001	0.0379257	-8.56703	0.648195	1	-	AC244102.2	-
ENSG00000259425	0.0001	0.0379147	-8.56661	0.648195	1	-	AC011767.1	-
ENSG00000225331	0.0001	0.037875	-8.5651	0.648195	1	-	LINC01678	long intergenic non-protein coding RNA 1678 [Source:HGNC Symbol;Acc:HGNC:52466]
ENSG00000171054	0.0001	0.0378707	-8.56494	0.644512	1	-	OR13H1	olfactory receptor family 13 subfamily H member 1 [Source:HGNC Symbol;Acc:HGNC:14755]
ENSG00000199038	0.0001	0.0378487	-8.5641	0.812184	1	-	MIR210	microRNA 210 [Source:HGNC Symbol;Acc:HGNC:31587]
ENSG00000224523	0.0001	0.03773	-8.55957	0.648195	1	-	AL445213.1	-
ENSG00000248843	0.0001	0.0376733	-8.5574	0.644512	1	-	AL645949.2	-
ENSG00000203747	0.0001	0.03759	-8.55421	0.40894	1	-	FCGR3A	Fc fragment of IgG receptor IIIa [Source:HGNC Symbol;Acc:HGNC:3619]
ENSG00000270578	0.0001	0.037581	-8.55386	0.812184	1	-	AP000787.2	-
ENSG00000137757	0.0001	0.0375797	-8.55381	0.535162	1	-	CASP5	caspase 5 [Source:HGNC Symbol;Acc:HGNC:1506]
ENSG00000281974	0.0001	0.037554	-8.55282	0.644512	1	-	AC025268.1	-
ENSG00000239684	0.0001	0.0375533	-8.5528	0.812184	1	-	PTGER4P3	prostaglandin E receptor 4 pseudogene 3 [Source:HGNC Symbol;Acc:HGNC:38498]
ENSG00000049768	0.0001	0.0375273	-8.5518	0.403093	1	-	FOXP3	forkhead box P3 [Source:HGNC Symbol;Acc:HGNC:6106]
ENSG00000178372	0.0001	0.037445	-8.54863	0.648195	1	-	CALML5	calmodulin like 5 [Source:HGNC Symbol;Acc:HGNC:18180]
ENSG00000228146	0.0001	0.0373727	-8.54584	0.63951	1	-	CASP16P	caspase 16, pseudogene [Source:HGNC Symbol;Acc:HGNC:27290]
ENSG00000269365	0.0001	0.037347	-8.54485	0.812184	1	-	AC120349.1	-
ENSG00000279161	0.0001	0.0372973	-8.54293	0.47456	1	-	AC093503.3	-
ENSG00000245928	0.0001	0.0372693	-8.54185	0.405532	1	-	AC112719.2	-
ENSG00000258743	0.0001	0.0372463	-8.54095	0.648195	1	-	LINC02301	long intergenic non-protein coding RNA 2301 [Source:HGNC Symbol;Acc:HGNC:53220]
ENSG00000231217	0.0001	0.0372463	-8.54095	0.812184	1	-	AC097347.1	-
ENSG00000244578	0.0001	0.037192	-8.53885	0.385951	1	-	LINC01391	long intergenic non-protein coding RNA 1391 [Source:HGNC Symbol;Acc:HGNC:50666]
ENSG00000225399	0.0001	0.0371503	-8.53723	0.63951	1	-	AC121247.1	-
ENSG00000269994	0.0001	0.0371437	-8.53697	0.40894	1	-	AL513318.2	-
ENSG00000259163	0.0001	0.0370173	-8.53206	0.644512	1	-	AL096869.2	-
ENSG00000224346	0.0001	0.0369723	-8.5303	0.644512	1	-	BICD1P1	BICD cargo adaptor 1 pseudogene 1 [Source:HGNC Symbol;Acc:HGNC:51374]
ENSG00000131910	0.0001	0.036931	-8.52869	0.648195	1	-	NR0B2	nuclear receptor subfamily 0 group B member 2 [Source:HGNC Symbol;Acc:HGNC:7961]
ENSG00000274321	0.0001	0.0367653	-8.5222	0.812184	1	-	uc_338	TUC338 [Source:RFAM;Acc:RF02271]
ENSG00000260765	0.0001	0.0367457	-8.52143	0.644512	1	-	CES1P2	carboxylesterase 1 pseudogene 2 [Source:HGNC Symbol;Acc:HGNC:48928]
ENSG00000169059	0.0001	0.036735	-8.52101	0.648195	1	-	VCX3A	variable charge, X-linked 3A [Source:HGNC Symbol;Acc:HGNC:18159]
ENSG00000181626	0.0001	0.0367187	-8.52037	0.338533	1	-	ANKRD62	ankyrin repeat domain 62 [Source:HGNC Symbol;Acc:HGNC:35241]
ENSG00000231390	0.0001	0.0367183	-8.52036	0.644512	1	-	SNX18P8	sorting nexin 18 pseudogene 8 [Source:HGNC Symbol;Acc:HGNC:39616]
ENSG00000272485	0.0001	0.0366833	-8.51898	0.40894	1	-	AL392183.1	-
ENSG00000277031	0.0001	0.0366817	-8.51892	0.812184	1	-	RN7SL796P	RNA, 7SL, cytoplasmic 796, pseudogene [Source:HGNC Symbol;Acc:HGNC:46812]
ENSG00000205642	0.0001	0.0365827	-8.51502	0.648195	1	-	VCX3B	variable charge, X-linked 3B [Source:HGNC Symbol;Acc:HGNC:31838]
ENSG00000233144	0.0001	0.036541	-8.51337	0.812184	1	-	AL512656.1	-
ENSG00000184788	0.0001	0.0364987	-8.5117	0.421228	1	-	SATL1	spermidine/spermine N1-acetyl transferase-like 1 [Source:HGNC Symbol;Acc:HGNC:27992]
ENSG00000213115	0.0001	0.0364903	-8.51137	0.648195	1	-	AC104131.1	-
ENSG00000213820	0.0001	0.0364887	-8.5113	0.40196	1	-	RPL13P2	ribosomal protein L13 pseudogene 2 [Source:HGNC Symbol;Acc:HGNC:16342]
ENSG00000225725	0.0001	0.036479	-8.51092	0.535162	1	-	FAM66E	family with sequence similarity 66 member E [Source:HGNC Symbol;Acc:HGNC:18735]
ENSG00000167800	0.0001	0.0362733	-8.50277	0.543585	1	-	TBX10	T-box 10 [Source:HGNC Symbol;Acc:HGNC:11593]
ENSG00000260484	0.0001	0.0361753	-8.49886	0.405532	1	-	AC131902.2	-
ENSG00000187472	0.0001	0.0361383	-8.49739	0.642001	1	-	AL589826.1	-
ENSG00000272203	0.0001	0.0361023	-8.49595	0.63951	1	-	AC004775.1	-
ENSG00000214204	0.0001	0.0361003	-8.49587	0.521603	1	-	HNRNPA1P43	heterogeneous nuclear ribonucleoprotein A1 pseudogene 43 [Source:HGNC Symbol;Acc:HGNC:48772]
ENSG00000264163	0.0001	0.0360963	-8.49571	0.812184	1	-	MIR3689B	microRNA 3689b [Source:HGNC Symbol;Acc:HGNC:38924]
ENSG00000236520	0.0001	0.036005	-8.49205	0.642001	1	-	GPC6-AS1	GPC6 antisense RNA 1 [Source:HGNC Symbol;Acc:HGNC:39909]
ENSG00000074211	0.0001	0.0360007	-8.49188	0.812184	1	-	PPP2R2C	protein phosphatase 2 regulatory subunit Bgamma [Source:HGNC Symbol;Acc:HGNC:9306]
ENSG00000133661	0.0001	0.035969	-8.49061	0.63951	1	-	SFTPD	surfactant protein D [Source:HGNC Symbol;Acc:HGNC:10803]
ENSG00000261319	0.0001	0.035969	-8.49061	0.63951	1	-	LINC02152	long intergenic non-protein coding RNA 2152 [Source:HGNC Symbol;Acc:HGNC:53014]
ENSG00000249691	0.0001	0.035955	-8.49005	0.644512	1	-	AC026117.1	-
ENSG00000264956	0.0001	0.035938	-8.48937	0.403093	1	-	AC138761.4	-
ENSG00000279315	0.0001	0.0358293	-8.485	0.63951	1	-	AL158212.4	-
ENSG00000241754	0.0001	0.0357953	-8.48363	0.812184	1	-	AC108748.1	-
ENSG00000204287	0.0001	0.0357573	-8.4821	0.63951	1	-	HLA-DRA	major histocompatibility complex, class II, DR alpha [Source:HGNC Symbol;Acc:HGNC:4947]
ENSG00000173213	0.0001	0.0357303	-8.48101	0.535162	1	-	TUBB8P12	tubulin beta 8 pseudogene 12 [Source:HGNC Symbol;Acc:HGNC:24983]
ENSG00000225014	0.0001	0.035666	-8.47841	0.63951	1	-	KCTD9P1	potassium channel tetramerization domain containing 9 pseudogene 1 [Source:HGNC Symbol;Acc:HGNC:21428]
ENSG00000258945	0.0001	0.035607	-8.47602	0.812184	1	-	AL049775.3	-
ENSG00000240929	0.0001	0.0355387	-8.47325	0.643821	1	-	HIST2H2BB	histone cluster 2 H2B family member b (pseudogene) [Source:HGNC Symbol;Acc:HGNC:20654]
ENSG00000269653	0.0001	0.0355087	-8.47203	0.521603	1	-	AC011479.3	-
ENSG00000229590	0.0001	0.035367	-8.46626	0.63951	1	-	AC005962.1	-
ENSG00000228919	0.0001	0.0353323	-8.46485	0.644512	1	-	AC097381.1	-
ENSG00000166405	0.0001	0.0353253	-8.46456	0.63951	1	-	RIC3	RIC3 acetylcholine receptor chaperone [Source:HGNC Symbol;Acc:HGNC:30338]
ENSG00000121314	0.0001	0.035287	-8.46299	0.648195	1	-	TAS2R8	taste 2 receptor member 8 [Source:HGNC Symbol;Acc:HGNC:14915]
ENSG00000232467	0.0001	0.0352663	-8.46215	0.812184	1	-	TMA16P2	translation machinery associated 16 homolog pseudogene 2 [Source:HGNC Symbol;Acc:HGNC:43781]
ENSG00000156150	0.0001	0.0352053	-8.45965	0.535162	1	-	ALX3	ALX homeobox 3 [Source:HGNC Symbol;Acc:HGNC:449]
ENSG00000187474	0.0001	0.0350637	-8.45383	0.403093	1	-	FPR3	formyl peptide receptor 3 [Source:HGNC Symbol;Acc:HGNC:3828]
ENSG00000227159	0.0001	0.0350617	-8.45375	0.644512	1	-	DDX11L16	DEAD/H-box helicase 11 like 16 [Source:HGNC Symbol;Acc:HGNC:37115]
ENSG00000259102	0.0001	0.0350373	-8.45275	0.648195	1	-	SMARCE1P3	SWI/SNF related, matrix associated, actin dependent regulator of chromatin, subfamily e, member 1 pseudogene 3 [Source:HGNC Symbol;Acc:HGNC:39733]
ENSG00000204572	0.0001	0.0350013	-8.45127	0.63951	1	-	KRTAP5-10	keratin associated protein 5-10 [Source:HGNC Symbol;Acc:HGNC:23605]
ENSG00000235742	0.0001	0.0349457	-8.44897	0.812184	1	-	AC012308.1	-
ENSG00000251682	0.0001	0.0348237	-8.44392	0.812184	1	-	AC122718.2	-
ENSG00000275291	0.0001	0.0347627	-8.44139	0.812184	1	-	U1	U1 spliceosomal RNA [Source:RFAM;Acc:RF00003]
ENSG00000258661	0.0001	0.034688	-8.43829	0.403093	1	-	AL079303.2	-
ENSG00000256723	0.0001	0.0346663	-8.43739	0.644512	1	-	AP003717.3	-
ENSG00000224177	0.0001	0.034644	-8.43646	0.63951	1	-	LINC00570	long intergenic non-protein coding RNA 570 [Source:HGNC Symbol;Acc:HGNC:43717]
ENSG00000213759	0.0001	0.034635	-8.43609	0.535162	1	-	UGT2B11	UDP glucuronosyltransferase family 2 member B11 [Source:HGNC Symbol;Acc:HGNC:12545]
ENSG00000205267	0.0001	0.034543	-8.43225	0.63951	1	-	DGAT2L7P	diacylglycerol O-acyltransferase 2 like 7, pseudogene [Source:HGNC Symbol;Acc:HGNC:44367]
ENSG00000269895	0.0001	0.0345317	-8.43178	0.63951	1	-	AP000654.1	-
ENSG00000251596	0.0001	0.034507	-8.43075	0.403093	1	-	HADHAP1	hydroxyacyl-CoA dehydrogenase/3-ketoacyl-CoA thiolase/enoyl-CoA hydratase (trifunctional protein), alpha subunit pseudogene 1 [Source:HGNC Symbol;Acc:HGNC:4802]
ENSG00000255624	0.0001	0.034481	-8.42966	0.644512	1	-	AC073585.1	-
ENSG00000242791	0.0001	0.0344783	-8.42955	0.63951	1	-	AC117395.3	-
ENSG00000232054	0.0001	0.0344477	-8.42826	0.40196	1	-	NPM1P34	nucleophosmin 1 pseudogene 34 [Source:HGNC Symbol;Acc:HGNC:45213]
ENSG00000241829	0.0001	0.034425	-8.42731	0.812184	1	-	AC026801.1	-
ENSG00000228277	0.0001	0.0343583	-8.42452	0.812184	1	-	AC112518.1	-
ENSG00000227242	0.0001	0.034358	-8.4245	0.543585	1	-	NBPF13P	NBPF member 13, pseudogene [Source:HGNC Symbol;Acc:HGNC:31995]
ENSG00000234277	0.0001	0.0343517	-8.42424	0.540009	1	-	LINC01641	long intergenic non-protein coding RNA 1641 [Source:HGNC Symbol;Acc:HGNC:52428]
ENSG00000270989	0.0001	0.034218	-8.41861	0.812184	1	-	AC139493.1	-
ENSG00000232780	0.0001	0.034158	-8.41608	0.812184	1	-	GAPDHP74	glyceraldehyde-3-phosphate dehydrogenase pseudogene 74 [Source:HGNC Symbol;Acc:HGNC:50647]
ENSG00000207955	0.0001	0.0341313	-8.41495	0.521603	1	-	MIR219A2	microRNA 219a-2 [Source:HGNC Symbol;Acc:HGNC:31598]
ENSG00000257493	0.0001	0.0341307	-8.41492	0.812184	1	-	AL512310.4	-
ENSG00000269916	0.0001	0.0340673	-8.41225	0.644512	1	-	AC133794.1	-
ENSG00000272053	0.0001	0.0339573	-8.40758	0.648195	1	-	AL160400.1	-
ENSG00000273777	0.0001	0.0339317	-8.40649	0.405532	1	-	CEACAM20	carcinoembryonic antigen related cell adhesion molecule 20 [Source:HGNC Symbol;Acc:HGNC:24879]
ENSG00000258638	0.0001	0.033919	-8.40595	0.812184	1	-	AL389895.1	-
ENSG00000167580	0.0001	0.0339043	-8.40533	0.40894	1	-	AQP2	aquaporin 2 [Source:HGNC Symbol;Acc:HGNC:634]
ENSG00000248791	0.0001	0.0338963	-8.40499	0.648195	1	-	AC010627.1	-
ENSG00000258473	0.0001	0.033854	-8.40318	0.812184	1	-	AC007686.2	-
ENSG00000241661	0.0001	0.0338163	-8.40158	0.812184	1	-	PPP1R2P6	protein phosphatase 1 regulatory inhibitor subunit 2 pseudogene 6 [Source:HGNC Symbol;Acc:HGNC:16321]
ENSG00000232699	0.0001	0.0337703	-8.39961	0.648195	1	-	BDH2P1	3-hydroxybutyrate dehydrogenase 2, pseudogene 1 [Source:HGNC Symbol;Acc:HGNC:21476]
ENSG00000271133	0.0001	0.0337587	-8.39911	0.63951	1	-	AC004130.1	-
ENSG00000134258	0.0001	0.033682	-8.39583	0.471148	1	-	VTCN1	V-set domain containing T-cell activation inhibitor 1 [Source:HGNC Symbol;Acc:HGNC:28873]
ENSG00000227195	0.0001	0.0336553	-8.39469	0.644512	1	-	MIR663AHG	MIR663A host gene [Source:HGNC Symbol;Acc:HGNC:27662]
ENSG00000283542	0.0001	0.0333963	-8.38355	0.812184	1	-	AC079602.4	-
ENSG00000258993	0.0001	0.0333577	-8.38187	0.812184	1	-	AL352979.3	-
ENSG00000235347	0.0001	0.033307	-8.37968	0.644512	1	-	Z84478.1	-
ENSG00000219758	0.0001	0.033248	-8.37712	0.812184	1	-	FO393415.2	-
ENSG00000215533	0.0001	0.0332187	-8.37585	0.648195	1	-	LINC00189	long intergenic non-protein coding RNA 189 [Source:HGNC Symbol;Acc:HGNC:18461]
ENSG00000258537	0.0001	0.033213	-8.3756	0.812184	1	-	FRMD6-AS2	FRMD6 antisense RNA 2 [Source:HGNC Symbol;Acc:HGNC:43637]
ENSG00000278881	0.0001	0.0331817	-8.37424	0.644512	1	-	FP325331.1	-
ENSG00000283052	0.0001	0.0331533	-8.37301	0.648195	1	-	LINC02456	long intergenic non-protein coding RNA 2456 [Source:HGNC Symbol;Acc:HGNC:53389]
ENSG00000188163	0.0001	0.033146	-8.37269	0.417024	1	-	FAM166A	family with sequence similarity 166 member A [Source:HGNC Symbol;Acc:HGNC:33818]
ENSG00000269578	0.000129333	0.0427653	-8.3692	0.594079	1	-	AC008764.7	-
ENSG00000270777	0.0001	0.0330553	-8.36874	0.812184	1	-	AL158042.1	-
ENSG00000272515	0.0001	0.0330287	-8.36757	0.648195	1	-	AL355578.1	-
ENSG00000183801	0.0001	0.033006	-8.36658	0.466529	1	-	OLFML1	olfactomedin like 1 [Source:HGNC Symbol;Acc:HGNC:24473]
ENSG00000270553	0.0001	0.0329793	-8.36542	0.812184	1	-	AC011921.3	-
ENSG00000270433	0.0001	0.032914	-8.36256	0.521603	1	-	AL049829.3	-
ENSG00000234715	0.0001	0.032892	-8.36159	0.405532	1	-	AC005064.1	-
ENSG00000163530	0.0001	0.032889	-8.36146	0.644512	1	-	DPPA2	developmental pluripotency associated 2 [Source:HGNC Symbol;Acc:HGNC:19197]
ENSG00000167554	0.0001	0.0328703	-8.36064	0.40894	1	-	ZNF610	zinc finger protein 610 [Source:HGNC Symbol;Acc:HGNC:26687]
ENSG00000259810	0.0001	0.0328013	-8.35761	0.471148	1	-	AC002519.1	-
ENSG00000213770	0.0001	0.0327077	-8.35349	0.812184	1	-	FAM210CP	family with sequence similarity 210 member C, pseudogene [Source:HGNC Symbol;Acc:HGNC:44938]
ENSG00000010932	0.0001	0.0326957	-8.35296	0.094819	1	-	FMO1	flavin containing monooxygenase 1 [Source:HGNC Symbol;Acc:HGNC:3769]
ENSG00000268496	0.0001	0.032692	-8.35279	0.812184	1	-	AC245884.9	-
ENSG00000228261	0.0001	0.0324903	-8.34387	0.648195	1	-	AL162742.1	-
ENSG00000189433	0.0001	0.0324483	-8.342	0.466529	1	-	GJB4	gap junction protein beta 4 [Source:HGNC Symbol;Acc:HGNC:4286]
ENSG00000265480	0.0001	0.0324057	-8.3401	0.540009	1	-	KRT18P55	keratin 18 pseudogene 55 [Source:HGNC Symbol;Acc:HGNC:26874]
ENSG00000268530	0.0001	0.0323227	-8.3364	0.405532	1	-	AC008403.2	-
ENSG00000279502	0.0001	0.0323027	-8.33551	0.812184	1	-	AC016542.2	-
ENSG00000165178	0.0001	0.032289	-8.3349	0.63951	1	-	NCF1C	neutrophil cytosolic factor 1C pseudogene [Source:HGNC Symbol;Acc:HGNC:32523]
ENSG00000204455	0.0001	0.032275	-8.33427	0.648195	1	-	TRIM51BP	tripartite motif-containing 51B, pseudogene [Source:HGNC Symbol;Acc:HGNC:37145]
ENSG00000257043	0.0001	0.032234	-8.33244	0.642001	1	-	AP006296.1	-
ENSG00000101198	0.0001	0.0322213	-8.33187	0.63951	1	-	NKAIN4	sodium/potassium transporting ATPase interacting 4 [Source:HGNC Symbol;Acc:HGNC:16191]
ENSG00000197213	0.0001	0.032209	-8.33132	0.523293	1	-	ZSCAN5B	zinc finger and SCAN domain containing 5B [Source:HGNC Symbol;Acc:HGNC:34246]
ENSG00000173612	0.0001	0.0321213	-8.32739	0.403093	1	-	GPRC6A	G protein-coupled receptor class C group 6 member A [Source:HGNC Symbol;Acc:HGNC:18510]
ENSG00000280423	0.0001	0.0320977	-8.32632	0.403093	1	-	AL359852.1	-
ENSG00000237838	0.0001	0.0320823	-8.32564	0.812184	1	-	AC092422.1	-
ENSG00000100312	0.0001	0.0320467	-8.32403	0.63951	1	-	ACR	acrosin [Source:HGNC Symbol;Acc:HGNC:126]
ENSG00000256399	0.0001	0.0320283	-8.3232	0.644512	1	-	AC079866.1	-
ENSG00000244998	0.0001	0.031784	-8.31216	0.648195	1	-	AC100803.1	-
ENSG00000227300	0.0001	0.03175	-8.31061	0.644512	1	-	KRT16P2	keratin 16 pseudogene 2 [Source:HGNC Symbol;Acc:HGNC:37807]
ENSG00000201747	0.0001	0.031679	-8.30738	0.812184	1	-	RNU6-534P	RNA, U6 small nuclear 534, pseudogene [Source:HGNC Symbol;Acc:HGNC:47497]
ENSG00000250511	0.0001	0.0316453	-8.30585	0.644512	1	-	AC098798.1	-
ENSG00000255522	0.0001	0.031586	-8.30314	0.812184	1	-	SNRPCP5	small nuclear ribonucleoprotein polypeptide C pseudogene 5 [Source:HGNC Symbol;Acc:HGNC:49820]
ENSG00000234562	0.0001	0.0315363	-8.30087	0.812184	1	-	TPMTP2	thiopurine S-methyltransferase pseudogene 2 [Source:HGNC Symbol;Acc:HGNC:44565]
ENSG00000260087	0.0001	0.0315063	-8.2995	0.812184	1	-	PCMTD1P2	protein-L-isoaspartate (D-aspartate) O-methyltransferase domain containing 1 pseudogene 2 [Source:HGNC Symbol;Acc:HGNC:38805]
ENSG00000256481	0.0001	0.031473	-8.29797	0.812184	1	-	AP006333.2	-
ENSG00000279621	0.0001	0.0314367	-8.2963	0.644512	1	-	AC020978.9	-
ENSG00000005001	0.0001	0.0314353	-8.29624	0.648195	1	-	PRSS22	protease, serine 22 [Source:HGNC Symbol;Acc:HGNC:14368]
ENSG00000196503	0.0001	0.031405	-8.29485	0.648195	1	-	ARL9	ADP ribosylation factor like GTPase 9 [Source:HGNC Symbol;Acc:HGNC:23592]
ENSG00000250148	0.0001	0.0313697	-8.29323	0.520961	1	-	KRT8P31	keratin 8 pseudogene 31 [Source:HGNC Symbol;Acc:HGNC:39865]
ENSG00000259782	0.0001	0.031366	-8.29306	0.644512	1	-	AC008915.1	-
ENSG00000267047	0.0001	0.0313083	-8.2904	0.812184	1	-	AC040977.2	-
ENSG00000188488	0.0001	0.0311603	-8.28357	0.540009	1	-	SERPINA5	serpin family A member 5 [Source:HGNC Symbol;Acc:HGNC:8723]
ENSG00000239809	0.0001	0.0310897	-8.28029	0.812184	1	-	AC008026.2	-
ENSG00000270755	0.0001	0.0310233	-8.27721	0.812184	1	-	AL136141.1	-
ENSG00000259920	0.0001	0.0309917	-8.27574	0.405532	1	-	AC007938.1	-
ENSG00000235385	0.0001	0.0307793	-8.26582	0.63951	1	-	LINC02154	long intergenic non-protein coding RNA 2154 [Source:HGNC Symbol;Acc:HGNC:53015]
ENSG00000145283	0.0001	0.0306767	-8.261	0.63951	1	-	SLC10A6	solute carrier family 10 member 6 [Source:HGNC Symbol;Acc:HGNC:30603]
ENSG00000247213	0.0001	0.0306763	-8.26098	0.466529	1	-	LINC01498	long intergenic non-protein coding RNA 1498 [Source:HGNC Symbol;Acc:HGNC:51164]
ENSG00000216901	0.0001	0.0306223	-8.25844	0.812184	1	-	ZNF603P	zinc finger protein 603, pseudogene [Source:HGNC Symbol;Acc:HGNC:23322]
ENSG00000227016	0.0001	0.0306043	-8.25759	0.648195	1	-	AL583808.2	-
ENSG00000269504	0.0001	0.0304977	-8.25256	0.523293	1	-	AC003973.2	-
ENSG00000241956	0.0001	0.0304817	-8.2518	0.812184	1	-	AC109466.1	-
ENSG00000243083	0.0001	0.0304653	-8.25102	0.405532	1	-	LINC00870	long intergenic non-protein coding RNA 870 [Source:HGNC Symbol;Acc:HGNC:27319]
ENSG00000205221	0.0001	0.030448	-8.2502	0.40894	1	-	VIT	vitrin [Source:HGNC Symbol;Acc:HGNC:12697]
ENSG00000224962	0.0001	0.030446	-8.25011	0.646348	1	-	PSAT1P4	phosphoserine aminotransferase 1 pseudogene 4 [Source:HGNC Symbol;Acc:HGNC:43990]
ENSG00000284594	0.0001	0.03032	-8.24413	0.812184	1	-	MIR7847	microRNA 7847 [Source:HGNC Symbol;Acc:HGNC:50153]
ENSG00000250651	0.0001	0.030265	-8.24151	0.644512	1	-	PABPC1P7	poly(A) binding protein cytoplasmic 1 pseudogene 7 [Source:HGNC Symbol;Acc:HGNC:37987]
ENSG00000232334	0.0001	0.0302363	-8.24014	0.812184	1	-	AL683842.1	-
ENSG00000262514	0.0001	0.0302183	-8.23928	0.644512	1	-	AC020978.7	-
ENSG00000264712	0.0001	0.0301947	-8.23815	0.812184	1	-	MIR4504	microRNA 4504 [Source:HGNC Symbol;Acc:HGNC:41624]
ENSG00000224083	0.0001	0.0301547	-8.23624	0.63951	1	-	MTCO1P11	mitochondrially encoded cytochrome c oxidase I pseudogene 11 [Source:HGNC Symbol;Acc:HGNC:52013]
ENSG00000140678	0.0001	0.0300917	-8.23322	0.63951	1	-	ITGAX	integrin subunit alpha X [Source:HGNC Symbol;Acc:HGNC:6152]
ENSG00000271286	0.0001	0.0300593	-8.23167	0.812184	1	-	U73023.1	-
ENSG00000233228	0.0001	0.0299367	-8.22577	0.63951	1	-	LPCAT2BP	lysophosphatidylcholine acyltransferase 2b, pseudogene [Source:HGNC Symbol;Acc:HGNC:38003]
ENSG00000254590	0.0001	0.0298917	-8.2236	0.644512	1	-	AP003396.2	-
ENSG00000284234	0.0001	0.0298603	-8.22209	0.643821	1	-	AC106774.6	-
ENSG00000256748	0.0001	0.0298583	-8.22199	0.63951	1	-	AC005832.2	-
ENSG00000091583	0.0001	0.02985	-8.22159	0.812184	1	-	APOH	apolipoprotein H [Source:HGNC Symbol;Acc:HGNC:616]
ENSG00000219298	0.0001	0.0298257	-8.22041	0.812184	1	-	AL355497.1	-
ENSG00000272682	0.0001	0.0297407	-8.21629	0.644512	1	-	AC004471.2	-
ENSG00000166862	0.0001	0.0297187	-8.21523	0.63951	1	-	CACNG2	calcium voltage-gated channel auxiliary subunit gamma 2 [Source:HGNC Symbol;Acc:HGNC:1406]
ENSG00000186150	0.0001	0.0296763	-8.21317	0.648195	1	-	UBL4B	ubiquitin like 4B [Source:HGNC Symbol;Acc:HGNC:32309]
ENSG00000228937	0.0001	0.0296563	-8.2122	0.648195	1	-	AC005539.1	-
ENSG00000267665	0.0001	0.0296363	-8.21122	0.385951	1	-	AC021683.3	-
ENSG00000147571	0.0001	0.0295773	-8.20835	0.644512	1	-	CRH	corticotropin releasing hormone [Source:HGNC Symbol;Acc:HGNC:2355]
ENSG00000089356	0.0001	0.0295647	-8.20773	0.812184	1	-	FXYD3	FXYD domain containing ion transport regulator 3 [Source:HGNC Symbol;Acc:HGNC:4027]
ENSG00000219384	0.0001	0.0294257	-8.20093	0.812184	1	-	AL138880.1	-
ENSG00000248388	0.0001	0.0293703	-8.19822	0.812184	1	-	AC093801.1	-
ENSG00000250349	0.0001	0.0293623	-8.19782	0.648195	1	-	AF241726.2	-
ENSG00000153347	0.0001	0.029353	-8.19736	0.644512	1	-	FAM81B	family with sequence similarity 81 member B [Source:HGNC Symbol;Acc:HGNC:26335]
ENSG00000151365	0.0001	0.0293047	-8.19499	0.63951	1	-	THRSP	thyroid hormone responsive [Source:HGNC Symbol;Acc:HGNC:11800]
ENSG00000239696	0.0001	0.0292467	-8.19213	0.517613	1	-	AC092104.1	-
ENSG00000222460	0.0001	0.0292413	-8.19187	0.812184	1	-	RN7SKP271	RNA, 7SK small nuclear pseudogene 271 [Source:HGNC Symbol;Acc:HGNC:45995]
ENSG00000279739	0.0001	0.029222	-8.19091	0.644512	1	-	AC011369.2	-
ENSG00000230225	0.0001	0.0292143	-8.19053	0.63951	1	-	MTND5P14	mitochondrially encoded NADH:ubiquinone oxidoreductase core subunit 5 pseudogene 14 [Source:HGNC Symbol;Acc:HGNC:42276]
ENSG00000258716	0.0001	0.0292053	-8.19009	0.543585	1	-	AL139193.2	-
ENSG00000260177	0.0001	0.0291933	-8.1895	0.812184	1	-	AC126696.1	-
ENSG00000253875	0.0001	0.0291597	-8.18783	0.812184	1	-	AC013643.2	-
ENSG00000278590	0.0001	0.0290977	-8.18476	0.812184	1	-	RN7SL113P	RNA, 7SL, cytoplasmic 113, pseudogene [Source:HGNC Symbol;Acc:HGNC:46129]
ENSG00000251451	0.0001	0.029085	-8.18413	0.812184	1	-	GTF2IP9	general transcription factor IIi pseudogene 9 [Source:HGNC Symbol;Acc:HGNC:51721]
ENSG00000134640	0.0001	0.0290493	-8.18236	0.63951	1	-	MTNR1B	melatonin receptor 1B [Source:HGNC Symbol;Acc:HGNC:7464]
ENSG00000267676	0.0001	0.0289737	-8.1786	0.63951	1	-	THA1P	threonine aldolase 1, pseudogene [Source:HGNC Symbol;Acc:HGNC:18004]
ENSG00000233435	0.0001	0.0288797	-8.17391	0.535162	1	-	AGGF1P2	angiogenic factor with G-patch and FHA domains 1 pseudogene 2 [Source:HGNC Symbol;Acc:HGNC:38052]
ENSG00000214035	0.0001	0.0288733	-8.17359	0.648195	1	-	AC073310.1	-
ENSG00000219222	0.0001	0.0287807	-8.16896	0.812184	1	-	RPL12P47	ribosomal protein L12 pseudogene 47 [Source:HGNC Symbol;Acc:HGNC:51939]
ENSG00000251366	0.0001	0.0287247	-8.16615	0.812184	1	-	DBIP2	diazepam binding inhibitor, acyl-CoA binding protein pseudogene 2 [Source:HGNC Symbol;Acc:HGNC:2691]
ENSG00000107242	0.0001	0.0286777	-8.16378	0.338533	1	-	PIP5K1B	phosphatidylinositol-4-phosphate 5-kinase type 1 beta [Source:HGNC Symbol;Acc:HGNC:8995]
ENSG00000178562	0.0001	0.028607	-8.16022	0.262171	1	-	CD28	CD28 molecule [Source:HGNC Symbol;Acc:HGNC:1653]
ENSG00000018625	0.0001	0.02857	-8.15836	0.209213	1	-	ATP1A2	ATPase Na+/K+ transporting subunit alpha 2 [Source:HGNC Symbol;Acc:HGNC:800]
ENSG00000228286	0.0001	0.0285677	-8.15824	0.648195	1	-	AP000593.2	-
ENSG00000261568	0.0001	0.0285303	-8.15635	0.63951	1	-	AL359694.2	-
ENSG00000206549	0.0001	0.028516	-8.15563	0.471148	1	-	PRSS50	protease, serine 50 [Source:HGNC Symbol;Acc:HGNC:17910]
ENSG00000225499	0.0001	0.028485	-8.15406	0.812184	1	-	AL663061.1	-
ENSG00000255556	0.0001	0.0284687	-8.15323	0.644512	1	-	AC087203.2	-
ENSG00000258647	0.0001	0.0284633	-8.15296	0.648195	1	-	LINC00930	long intergenic non-protein coding RNA 930 [Source:HGNC Symbol;Acc:HGNC:48620]
ENSG00000206978	0.0001	0.0284323	-8.15139	0.812184	1	-	Y_RNA	Y RNA [Source:RFAM;Acc:RF00019]
ENSG00000233360	0.0001	0.0284277	-8.15115	0.535162	1	-	Z83844.2	-
ENSG00000215704	0.0001	0.0283687	-8.14815	0.63951	1	-	CELA2B	chymotrypsin like elastase family member 2B [Source:HGNC Symbol;Acc:HGNC:29995]
ENSG00000242439	0.0001	0.0283317	-8.14627	0.812184	1	-	AC127024.1	-
ENSG00000229979	0.0001	0.0282443	-8.14182	0.812184	1	-	AC243428.1	-
ENSG00000283286	0.0001	0.028231	-8.14114	0.644512	1	-	AC093277.1	-
ENSG00000212657	0.0001	0.028225	-8.14083	0.648195	1	-	KRTAP16-1	keratin associated protein 16-1 [Source:HGNC Symbol;Acc:HGNC:18916]
ENSG00000259277	0.0001	0.0282227	-8.14071	0.812184	1	-	AC127522.1	-
ENSG00000255084	0.0001	0.028135	-8.13622	0.812184	1	-	AP003110.1	-
ENSG00000261336	0.0001	0.0280593	-8.13234	0.409994	1	-	EIF4BP5	eukaryotic translation initiation factor 4B pseudogene 5 [Source:HGNC Symbol;Acc:HGNC:37938]
ENSG00000255967	0.0001	0.0280553	-8.13213	0.540009	1	-	HADHAP2	hydroxyacyl-CoA dehydrogenase/3-ketoacyl-CoA thiolase/enoyl-CoA hydratase (trifunctional protein), alpha subunit pseudogene 2 [Source:HGNC Symbol;Acc:HGNC:38585]
ENSG00000279778	0.0001	0.02804	-8.13134	0.405532	1	-	AL445437.1	-
ENSG00000258989	0.0001	0.028035	-8.13109	0.812184	1	-	AL355916.3	-
ENSG00000173250	0.0001	0.028029	-8.13078	0.47456	1	-	GPR151	G protein-coupled receptor 151 [Source:HGNC Symbol;Acc:HGNC:23624]
ENSG00000259756	0.0001	0.0279917	-8.12885	0.812184	1	-	AC100839.1	-
ENSG00000143340	0.0001	0.0279443	-8.12641	0.47456	1	-	FAM163A	family with sequence similarity 163 member A [Source:HGNC Symbol;Acc:HGNC:28274]
ENSG00000200278	0.0001	0.027906	-8.12443	0.643821	1	-	RNA5SP352	RNA, 5S ribosomal pseudogene 352 [Source:HGNC Symbol;Acc:HGNC:43252]
ENSG00000273597	0.0001	0.0278743	-8.12279	0.63951	1	-	AL355377.1	-
ENSG00000189134	0.0001	0.027752	-8.11645	0.644512	1	-	NKAPL	NFKB activating protein like [Source:HGNC Symbol;Acc:HGNC:21584]
ENSG00000264031	0.0001	0.027752	-8.11645	0.812184	1	-	ABHD15-AS1	ABHD15 antisense RNA 1 [Source:HGNC Symbol;Acc:HGNC:49685]
ENSG00000163568	0.0001	0.0277303	-8.11532	0.648195	1	-	AIM2	absent in melanoma 2 [Source:HGNC Symbol;Acc:HGNC:357]
ENSG00000230478	0.0001	0.0277293	-8.11527	0.40196	1	-	Z96811.1	-
ENSG00000282033	0.0001	0.0277267	-8.11513	0.812184	1	-	AC074387.1	-
ENSG00000137270	0.0001	0.027695	-8.11348	0.405532	1	-	GCM1	glial cells missing homolog 1 [Source:HGNC Symbol;Acc:HGNC:4197]
ENSG00000215795	0.0001	0.0275907	-8.10804	0.63951	1	-	AL390728.2	-
ENSG00000089558	0.0001	0.027552	-8.10601	0.133008	1	-	KCNH4	potassium voltage-gated channel subfamily H member 4 [Source:HGNC Symbol;Acc:HGNC:6253]
ENSG00000186417	0.0001	0.0275337	-8.10505	0.543585	1	-	GLDN	gliomedin [Source:HGNC Symbol;Acc:HGNC:29514]
ENSG00000020219	0.0001	0.0275247	-8.10458	0.63951	1	-	CCT8L1P	chaperonin containing TCP1 subunit 8 like 1, pseudogene [Source:HGNC Symbol;Acc:HGNC:32153]
ENSG00000203818	0.0001	0.02751	-8.10381	0.812184	1	-	HIST2H3PS2	histone cluster 2 H3 pseudogene 2 [Source:HGNC Symbol;Acc:HGNC:32060]
ENSG00000232916	0.0001	0.02748	-8.10224	0.40196	1	-	HMGN2P27	high mobility group nucleosomal binding domain 2 pseudogene 27 [Source:HGNC Symbol;Acc:HGNC:39394]
ENSG00000165495	0.0001	0.027479	-8.10219	0.327637	1	-	PKNOX2	PBX/knotted 1 homeobox 2 [Source:HGNC Symbol;Acc:HGNC:16714]
ENSG00000260410	0.0001	0.027451	-8.10071	0.648195	1	-	AC040169.2	-
ENSG00000173838	0.0001	0.027436	-8.09993	0.471148	1	-	2021-03-10	membrane associated ring-CH-type finger 10 [Source:HGNC Symbol;Acc:HGNC:26655]
ENSG00000065675	0.0001	0.027334	-8.09455	0.405532	1	-	PRKCQ	protein kinase C theta [Source:HGNC Symbol;Acc:HGNC:9410]
ENSG00000234323	0.0001	0.027329	-8.09429	0.63951	1	-	LINC01505	long intergenic non-protein coding RNA 1505 [Source:HGNC Symbol;Acc:HGNC:51186]
ENSG00000071909	0.0001	0.0272563	-8.09045	0.812184	1	-	MYO3B	myosin IIIB [Source:HGNC Symbol;Acc:HGNC:15576]
ENSG00000178498	0.0001	0.0272393	-8.08955	0.47456	1	-	DTX3	deltex E3 ubiquitin ligase 3 [Source:HGNC Symbol;Acc:HGNC:24457]
ENSG00000225421	0.0001	0.027232	-8.08916	0.63951	1	-	AC019330.1	-
ENSG00000213244	0.0001	0.0271793	-8.08637	0.812184	1	-	HIST2H3DP1	histone cluster 2 H3 family member d pseudogene 1 [Source:HGNC Symbol;Acc:HGNC:43797]
ENSG00000240048	0.0001	0.0271507	-8.08484	0.40894	1	-	DDX50P2	DEAD-box helicase 50 pseudogene 2 [Source:HGNC Symbol;Acc:HGNC:18975]
ENSG00000242412	0.0001	0.0271413	-8.08435	0.63951	1	-	DBIL5P2	diazepam binding inhibitor-like 5 pseudogene 2 [Source:HGNC Symbol;Acc:HGNC:38518]
ENSG00000280025	0.0001	0.0271277	-8.08362	0.266855	1	-	AL008638.6	-
ENSG00000225442	0.0001	0.027025	-8.07815	0.63951	1	-	MPRIP-AS1	MPRIP antisense RNA 1 [Source:HGNC Symbol;Acc:HGNC:41263]
ENSG00000259931	0.0001	0.0269753	-8.0755	0.812184	1	-	AC105036.1	-
ENSG00000158008	0.0001	0.026872	-8.06996	0.326714	1	-	EXTL1	exostosin like glycosyltransferase 1 [Source:HGNC Symbol;Acc:HGNC:3515]
ENSG00000201644	0.00274733	0.736889	-8.06727	0.527416	1	-	Y_RNA	Y RNA [Source:RFAM;Acc:RF00019]
ENSG00000243504	0.0001	0.0267367	-8.06268	0.812184	1	-	RPS23P1	ribosomal protein S23 pseudogene 1 [Source:HGNC Symbol;Acc:HGNC:16043]
ENSG00000242562	0.0001	0.026713	-8.0614	0.648195	1	-	DCAF13P1	DDB1 and CUL4 associated factor 13 pseudogene 1 [Source:HGNC Symbol;Acc:HGNC:43866]
ENSG00000266925	0.0001	0.0266617	-8.05862	0.648195	1	-	AC015818.8	-
ENSG00000228666	0.0001	0.0266427	-8.05759	0.521603	1	-	KRT18P1	keratin 18 pseudogene 1 [Source:HGNC Symbol;Acc:HGNC:6434]
ENSG00000223683	0.0001	0.0265383	-8.05193	0.812184	1	-	RPSAP65	ribosomal protein SA pseudogene 65 [Source:HGNC Symbol;Acc:HGNC:51914]
ENSG00000204195	0.0001	0.0264987	-8.04978	0.648195	1	-	AWAT1	acyl-CoA wax alcohol acyltransferase 1 [Source:HGNC Symbol;Acc:HGNC:23252]
ENSG00000277598	0.0001	0.0264137	-8.04514	0.812184	1	-	BX088702.1	-
ENSG00000105696	0.0001	0.0264023	-8.04452	0.644512	1	-	TMEM59L	transmembrane protein 59 like [Source:HGNC Symbol;Acc:HGNC:13237]
ENSG00000213779	0.0001	0.0263713	-8.04283	0.812184	1	-	AC107956.2	-
ENSG00000283098	0.0001	0.026362	-8.04232	0.644512	1	-	AL132857.2	-
ENSG00000258875	0.0001	0.0263167	-8.03983	0.644512	1	-	AL135818.1	-
ENSG00000263745	0.0001	0.02631	-8.03947	0.812184	1	-	AP005230.1	-
ENSG00000238166	0.0001	0.026242	-8.03573	0.812184	1	-	AC022748.1	-
ENSG00000230578	0.0001	0.0262113	-8.03405	0.812184	1	-	AC234781.5	-
ENSG00000255328	0.0001	0.0261767	-8.03214	0.812184	1	-	AC136475.5	-
ENSG00000258112	0.0001	0.026171	-8.03183	0.648195	1	-	CCNG2P1	cyclin G2 pseudogene 1 [Source:HGNC Symbol;Acc:HGNC:50853]
ENSG00000232810	0.0001	0.0261707	-8.03181	0.648195	1	-	TNF	tumor necrosis factor [Source:HGNC Symbol;Acc:HGNC:11892]
ENSG00000232662	0.0001	0.0261317	-8.02966	0.648195	1	-	LDHBP1	lactate dehydrogenase B pseudogene 1 [Source:HGNC Symbol;Acc:HGNC:6542]
ENSG00000250869	0.0001	0.0261277	-8.02943	0.63951	1	-	AC087359.1	-
ENSG00000237135	0.0001	0.0261267	-8.02938	0.515319	1	-	DDX10P1	DEAD-box helicase 10 pseudogene 1 [Source:HGNC Symbol;Acc:HGNC:44960]
ENSG00000271182	0.0001	0.0261243	-8.02925	0.642001	1	-	AC123912.5	-
ENSG00000231697	0.0001	0.0261063	-8.02826	0.812184	1	-	NANOGP5	Nanog homeobox pseudogene 5 [Source:HGNC Symbol;Acc:HGNC:23103]
ENSG00000233887	0.0001	0.0260917	-8.02745	0.644512	1	-	AL354685.1	-
ENSG00000075461	0.0001	0.0259537	-8.01979	0.47456	1	-	CACNG4	calcium voltage-gated channel auxiliary subunit gamma 4 [Source:HGNC Symbol;Acc:HGNC:1408]
ENSG00000180113	0.0001	0.0259237	-8.01813	0.266323	1	-	TDRD6	tudor domain containing 6 [Source:HGNC Symbol;Acc:HGNC:21339]
ENSG00000274693	0.0001	0.0258993	-8.01677	0.812184	1	-	HTT-AS1_2	HTT antisense RNA 1 conserved region 2 [Source:RFAM;Acc:RF02135]
ENSG00000069764	0.0001	0.0258783	-8.0156	0.648195	1	-	PLA2G10	phospholipase A2 group X [Source:HGNC Symbol;Acc:HGNC:9029]
ENSG00000261083	0.0001	0.025856	-8.01436	0.644512	1	-	AC110618.1	-
ENSG00000207525	0.0001	0.0258517	-8.01411	0.812184	1	-	Y_RNA	Y RNA [Source:RFAM;Acc:RF00019]
ENSG00000259157	0.0001	0.0258313	-8.01298	0.812184	1	-	AL079307.3	-
ENSG00000255733	0.0001	0.0257267	-8.00712	0.63951	1	-	IFNG-AS1	IFNG antisense RNA 1 [Source:HGNC Symbol;Acc:HGNC:43910]
ENSG00000271904	0.0001	0.0257223	-8.00688	0.812184	1	-	AC091826.2	-
ENSG00000223806	0.0001	0.0255813	-7.99895	0.644512	1	-	LINC00114	long intergenic non-protein coding RNA 114 [Source:HGNC Symbol;Acc:HGNC:1265]
ENSG00000214534	0.0001	0.0254437	-7.99116	0.47456	1	-	ZNF705E	zinc finger protein 705E [Source:HGNC Symbol;Acc:HGNC:33203]
ENSG00000225933	0.0001	0.0254393	-7.99092	0.812184	1	-	AC133965.1	-
ENSG00000226081	0.0001	0.025393	-7.98829	0.646348	1	-	USP12PX	ubiquitin specific peptidase 12 pseudogene, X-linked [Source:HGNC Symbol;Acc:HGNC:21410]
ENSG00000227813	0.0001	0.025374	-7.98721	0.812184	1	-	Z82190.1	-
ENSG00000233921	0.0001	0.0253407	-7.98531	0.646348	1	-	RPS15AP40	ribosomal protein S15a pseudogene 40 [Source:HGNC Symbol;Acc:HGNC:36041]
ENSG00000236475	0.0001	0.025338	-7.98516	0.812184	1	-	TRIM26BP	tripartite motif containing 26B, pseudogene [Source:HGNC Symbol;Acc:HGNC:31338]
ENSG00000150337	0.0001	0.025211	-7.97791	0.543585	1	-	FCGR1A	Fc fragment of IgG receptor Ia [Source:HGNC Symbol;Acc:HGNC:3613]
ENSG00000248969	0.0001	0.0251193	-7.97265	0.812184	1	-	AC137810.1	-
ENSG00000273233	0.0001	0.025081	-7.97045	0.812184	1	-	AC097724.1	-
ENSG00000257023	0.0001	0.0250247	-7.96721	0.812184	1	-	AC087241.3	-
ENSG00000236754	0.0001	0.0249853	-7.96494	0.63951	1	-	AC007666.1	-
ENSG00000213290	0.0001	0.0249567	-7.96328	0.515319	1	-	PGK1P2	phosphoglycerate kinase 1, pseudogene 2 [Source:HGNC Symbol;Acc:HGNC:8899]
ENSG00000235834	0.0001	0.024948	-7.96278	0.644512	1	-	Z93022.1	-
ENSG00000245768	0.0001	0.0249173	-7.96101	0.812184	1	-	AC092378.1	-
ENSG00000122194	0.0001	0.024916	-7.96093	0.517613	1	-	PLG	plasminogen [Source:HGNC Symbol;Acc:HGNC:9071]
ENSG00000251614	0.0001	0.0248963	-7.95979	0.63951	1	-	HSPA8P19	heat shock protein family A (Hsp70) member pseudogene 19 [Source:HGNC Symbol;Acc:HGNC:44935]
ENSG00000259369	0.0001	0.0248477	-7.95697	0.812184	1	-	AC009997.1	-
ENSG00000259430	0.0001	0.0248217	-7.95546	0.812184	1	-	CERS3-AS1	CERS3 antisense RNA 1 [Source:HGNC Symbol;Acc:HGNC:51431]
ENSG00000228882	0.0001	0.0247683	-7.95235	0.535162	1	-	CICP9	capicua transcriptional repressor pseudogene 9 [Source:HGNC Symbol;Acc:HGNC:37758]
ENSG00000135409	0.0001	0.0247323	-7.95025	0.63951	1	-	AMHR2	anti-Mullerian hormone receptor type 2 [Source:HGNC Symbol;Acc:HGNC:465]
ENSG00000248880	0.0001	0.0246827	-7.94735	0.644512	1	-	ICE2P1	interactor of little elongation complex ELL subunit 2 pseudogene 1 [Source:HGNC Symbol;Acc:HGNC:48856]
ENSG00000279340	0.0001	0.0246777	-7.94706	0.812184	1	-	AC090617.8	-
ENSG00000264662	0.0001	0.0245667	-7.94056	0.812184	1	-	AC126365.2	-
ENSG00000283654	0.0001	0.0245427	-7.93915	0.516978	1	-	AL117258.1	-
ENSG00000251166	0.0001	0.024531	-7.93846	0.812184	1	-	OR7E163P	olfactory receptor family 7 subfamily E member 163 pseudogene [Source:HGNC Symbol;Acc:HGNC:45040]
ENSG00000270765	0.0001	0.024511	-7.93729	0.466529	1	-	GAS2L2	growth arrest specific 2 like 2 [Source:HGNC Symbol;Acc:HGNC:24846]
ENSG00000176343	0.0001	0.024485	-7.93575	0.812184	1	-	RPL37AP8	ribosomal protein L37a pseudogene 8 [Source:HGNC Symbol;Acc:HGNC:35645]
ENSG00000253144	0.0001	0.0244547	-7.93397	0.812184	1	-	AC104117.2	-
ENSG00000278044	0.0001	0.024454	-7.93393	0.812184	1	-	AC023490.3	-
ENSG00000244061	0.0001	0.0244217	-7.93202	0.812184	1	-	AC093278.1	-
ENSG00000279409	0.0001	0.0243237	-7.92622	0.644512	1	-	AC020658.6	-
ENSG00000205794	0.0001	0.0242717	-7.92313	0.812184	1	-	AC098591.1	-
ENSG00000233339	0.0001	0.0241913	-7.91835	0.812184	1	-	AC018878.1	-
ENSG00000236430	0.0001	0.0241843	-7.91793	0.648195	1	-	KRT8P29	keratin 8 pseudogene 29 [Source:HGNC Symbol;Acc:HGNC:33381]
ENSG00000092529	0.0001	0.0241743	-7.91733	0.812184	1	-	CAPN3	calpain 3 [Source:HGNC Symbol;Acc:HGNC:1480]
ENSG00000206192	0.0001	0.0241367	-7.91508	0.466529	1	-	ANKRD20A9P	ankyrin repeat domain 20 family member A9, pseudogene [Source:HGNC Symbol;Acc:HGNC:42023]
ENSG00000266594	0.0001	0.0241003	-7.91291	0.812184	1	-	MIR4766	microRNA 4766 [Source:HGNC Symbol;Acc:HGNC:41680]
ENSG00000279982	0.0001	0.0240777	-7.91155	0.47456	1	-	AL162274.3	-
ENSG00000255148	0.0001	0.024059	-7.91043	0.812184	1	-	AC239802.2	-
ENSG00000229235	0.0001	0.024018	-7.90797	0.812184	1	-	RPL37P18	ribosomal protein L37 pseudogene 18 [Source:HGNC Symbol;Acc:HGNC:35919]
ENSG00000258870	0.0001	0.0240103	-7.90751	0.812184	1	-	EIF4EBP1P1	eukaryotic translation initiation factor 4E binding protein 1 pseudogene 1 [Source:HGNC Symbol;Acc:HGNC:20160]
ENSG00000277981	0.0001	0.0239857	-7.90603	0.812184	1	-	AL731556.2	-
ENSG00000087245	0.0001	0.0239647	-7.90477	0.40894	1	-	MMP2	matrix metallopeptidase 2 [Source:HGNC Symbol;Acc:HGNC:7166]
ENSG00000231675	0.0001	0.0239477	-7.90374	0.812184	1	-	AC005042.3	-
ENSG00000233974	0.0001	0.0238687	-7.89897	0.515319	1	-	AC138951.1	-
ENSG00000109181	0.0001	0.0238613	-7.89853	0.63951	1	-	UGT2B10	UDP glucuronosyltransferase family 2 member B10 [Source:HGNC Symbol;Acc:HGNC:12544]
ENSG00000243537	0.0001	0.023846	-7.8976	0.40196	1	-	KC877373.1	-
ENSG00000261424	0.0001	0.02383	-7.89664	0.642001	1	-	ATP5F1P7	ATP synthase, H+ transporting, mitochondrial Fo complex subunit B1 pseudogene 7 [Source:HGNC Symbol;Acc:HGNC:39748]
ENSG00000279841	0.0001	0.0237607	-7.89243	0.648195	1	-	AC092135.3	-
ENSG00000231345	0.0001	0.023702	-7.88886	0.63951	1	-	BEND3P1	BEN domain containing 3 pseudogene 1 [Source:HGNC Symbol;Acc:HGNC:45014]
ENSG00000198185	0.0001	0.0236897	-7.88811	0.466529	1	-	ZNF334	zinc finger protein 334 [Source:HGNC Symbol;Acc:HGNC:15806]
ENSG00000219088	0.0001	0.023683	-7.88771	0.648195	1	-	Z97206.1	-
ENSG00000248406	0.0001	0.0236217	-7.88397	0.648195	1	-	AC008758.3	-
ENSG00000162391	0.0001	0.0236143	-7.88352	0.517613	1	-	FAM151A	family with sequence similarity 151 member A [Source:HGNC Symbol;Acc:HGNC:25032]
ENSG00000276580	0.0001	0.0236033	-7.88285	0.812184	1	-	MIR8055	microRNA 8055 [Source:HGNC Symbol;Acc:HGNC:50241]
ENSG00000284283	0.0001	0.023539	-7.87891	0.643821	1	-	AC106774.7	-
ENSG00000176970	0.0001	0.0235053	-7.87684	0.646348	1	-	RPL7L1P11	ribosomal protein L7 like 1 pseudogene 11 [Source:HGNC Symbol;Acc:HGNC:39493]
ENSG00000240184	0.0001	0.0235037	-7.87674	0.47456	1	-	PCDHGC3	protocadherin gamma subfamily C, 3 [Source:HGNC Symbol;Acc:HGNC:8716]
ENSG00000278289	0.0001	0.023492	-7.87603	0.405532	1	-	CT45A6	cancer/testis antigen family 45 member A6 [Source:HGNC Symbol;Acc:HGNC:33271]
ENSG00000269889	0.0001	0.0234827	-7.87545	0.812184	1	-	AC078802.1	-
ENSG00000240990	0.0001	0.023452	-7.87357	0.644512	1	-	HOXA11-AS	HOXA11 antisense RNA [Source:HGNC Symbol;Acc:HGNC:24957]
ENSG00000255186	0.0001	0.0233943	-7.87002	0.812184	1	-	AC087277.2	-
ENSG00000250955	0.0001	0.023343	-7.86685	0.812184	1	-	AC008592.2	-
ENSG00000227802	0.0001	0.0233283	-7.86594	0.648195	1	-	DNAJB3	DnaJ heat shock protein family (Hsp40) member B3 [Source:HGNC Symbol;Acc:HGNC:32397]
ENSG00000188672	0.0001	0.0232637	-7.86193	0.648195	1	-	RHCE	Rh blood group CcEe antigens [Source:HGNC Symbol;Acc:HGNC:10008]
ENSG00000171234	0.0001	0.0232443	-7.86074	0.648195	1	-	UGT2B7	UDP glucuronosyltransferase family 2 member B7 [Source:HGNC Symbol;Acc:HGNC:12554]
ENSG00000187416	0.0001	0.0232097	-7.85858	0.648195	1	-	LHFPL3	lipoma HMGIC fusion partner-like 3 [Source:HGNC Symbol;Acc:HGNC:6589]
ENSG00000280409	0.0001	0.0232037	-7.85821	0.648195	1	-	LINC01101	long intergenic non-protein coding RNA 1101 [Source:HGNC Symbol;Acc:HGNC:25923]
ENSG00000224462	0.0001	0.0231707	-7.85616	0.648195	1	-	C4BPAP1	complement component 4 binding protein, alpha pseudogene 1 [Source:HGNC Symbol;Acc:HGNC:1326]
ENSG00000155849	0.0001	0.023121	-7.85306	0.321126	1	-	ELMO1	engulfment and cell motility 1 [Source:HGNC Symbol;Acc:HGNC:16286]
ENSG00000270509	0.0001	0.023066	-7.84962	0.648195	1	-	AL713998.2	-
ENSG00000123165	0.0001	0.0230493	-7.84858	0.644512	1	-	ACTRT1	actin related protein T1 [Source:HGNC Symbol;Acc:HGNC:24027]
ENSG00000187758	0.0001	0.023044	-7.84825	0.644512	1	-	ADH1A	alcohol dehydrogenase 1A (class I), alpha polypeptide [Source:HGNC Symbol;Acc:HGNC:249]
ENSG00000226806	0.0001	0.0230137	-7.84635	0.63951	1	-	AC011893.1	-
ENSG00000224204	0.0001	0.0230127	-7.84628	0.648195	1	-	PHEX-AS1	PHEX antisense RNA 1 [Source:HGNC Symbol;Acc:HGNC:40445]
ENSG00000256075	0.0001	0.023001	-7.84555	0.517613	1	-	AC008033.1	-
ENSG00000046774	0.0001	0.0229987	-7.84541	0.644512	1	-	MAGEC2	MAGE family member C2 [Source:HGNC Symbol;Acc:HGNC:13574]
ENSG00000173093	0.0001	0.0229757	-7.84396	0.644512	1	-	CCDC63	coiled-coil domain containing 63 [Source:HGNC Symbol;Acc:HGNC:26669]
ENSG00000260603	0.0001	0.0228953	-7.83891	0.812184	1	-	AC133539.1	-
ENSG00000166569	0.0001	0.0228923	-7.83872	0.648195	1	-	CPLX4	complexin 4 [Source:HGNC Symbol;Acc:HGNC:24330]
ENSG00000179577	0.0001	0.0228683	-7.83721	0.644512	1	-	AP003471.1	-
ENSG00000112077	0.0001	0.0228637	-7.83691	0.648195	1	-	RHAG	Rh-associated glycoprotein [Source:HGNC Symbol;Acc:HGNC:10006]
ENSG00000282080	0.0001	0.0228547	-7.83634	0.812184	1	-	AC006511.4	-
ENSG00000230047	0.0001	0.022824	-7.83441	0.812184	1	-	AC017104.2	-
ENSG00000258787	0.0001	0.0228047	-7.83319	0.812184	1	-	AC091078.2	-
ENSG00000232578	0.0001	0.0227987	-7.83281	0.63951	1	-	AC093311.1	-
ENSG00000279311	0.0001	0.022797	-7.8327	0.648195	1	-	AC092999.1	-
ENSG00000226636	0.0001	0.0227733	-7.8312	0.648195	1	-	AC006020.1	-
ENSG00000235091	0.0001	0.0227213	-7.8279	0.812184	1	-	BX324167.1	-
ENSG00000231300	0.0001	0.022695	-7.82623	0.812184	1	-	EZH2P1	enhancer of zeste 2 polycomb repressive complex 2 subunit pseudogene 1 [Source:HGNC Symbol;Acc:HGNC:39918]
ENSG00000260988	0.0001	0.0226387	-7.82265	0.648195	1	-	AC090260.1	-
ENSG00000256193	0.0001	0.022592	-7.81967	0.648195	1	-	LINC00507	long intergenic non-protein coding RNA 507 [Source:HGNC Symbol;Acc:HGNC:43558]
ENSG00000249661	0.0001	0.0225817	-7.81901	0.471148	1	-	TNRC18P1	trinucleotide repeat containing 18 pseudogene 1 [Source:HGNC Symbol;Acc:HGNC:43881]
ENSG00000171557	0.0001	0.0225457	-7.81671	0.644512	1	-	FGG	fibrinogen gamma chain [Source:HGNC Symbol;Acc:HGNC:3694]
ENSG00000184224	0.0001	0.0225363	-7.81611	0.540009	1	-	C11orf72	chromosome 11 open reading frame 72 [Source:HGNC Symbol;Acc:HGNC:26915]
ENSG00000250039	0.0001	0.0224863	-7.8129	0.643821	1	-	AC096719.1	-
ENSG00000185615	0.0001	0.0224243	-7.80892	0.648195	1	-	PDIA2	protein disulfide isomerase family A member 2 [Source:HGNC Symbol;Acc:HGNC:14180]
ENSG00000230948	0.0001	0.022327	-7.80265	0.648195	1	-	AP001331.1	-
ENSG00000069018	0.0001	0.0222903	-7.80027	0.409994	1	-	TRPC7	transient receptor potential cation channel subfamily C member 7 [Source:HGNC Symbol;Acc:HGNC:20754]
ENSG00000187017	0.0001	0.0222583	-7.7982	0.405532	1	-	ESPN	espin [Source:HGNC Symbol;Acc:HGNC:13281]
ENSG00000132911	0.0001	0.022227	-7.79617	0.63951	1	-	NMUR2	neuromedin U receptor 2 [Source:HGNC Symbol;Acc:HGNC:16454]
ENSG00000236646	0.0001	0.0222017	-7.79452	0.812184	1	-	LAMTOR5P1	late endosomal/lysosomal adaptor, MAPK and MTOR activator 5 pseudogene 1 [Source:HGNC Symbol;Acc:HGNC:31854]
ENSG00000279482	0.0001	0.0221563	-7.79158	0.812184	1	-	AC007683.2	-
ENSG00000203334	0.0001	0.0221523	-7.79131	0.63951	1	-	AP003027.1	-
ENSG00000162374	0.0001	0.022119	-7.78914	0.47456	1	-	ELAVL4	ELAV like RNA binding protein 4 [Source:HGNC Symbol;Acc:HGNC:3315]
ENSG00000072133	0.0001	0.022104	-7.78816	0.326881	1	-	RPS6KA6	ribosomal protein S6 kinase A6 [Source:HGNC Symbol;Acc:HGNC:10435]
ENSG00000251321	0.0001	0.0220357	-7.7837	0.63951	1	-	PCAT4	prostate cancer associated transcript 4 (non-protein coding) [Source:HGNC Symbol;Acc:HGNC:24853]
ENSG00000259527	0.0001	0.0220303	-7.78335	0.63951	1	-	LINC00052	long intergenic non-protein coding RNA 52 [Source:HGNC Symbol;Acc:HGNC:26455]
ENSG00000237713	0.0001	0.0219343	-7.77705	0.812184	1	-	AC011287.2	-
ENSG00000207052	0.0001	0.0218627	-7.77233	0.812184	1	-	RNU6-378P	RNA, U6 small nuclear 378, pseudogene [Source:HGNC Symbol;Acc:HGNC:47341]
ENSG00000159217	0.0001	0.021862	-7.77228	0.812184	1	-	IGF2BP1	insulin like growth factor 2 mRNA binding protein 1 [Source:HGNC Symbol;Acc:HGNC:28866]
ENSG00000271752	0.0001	0.0218593	-7.77211	0.812184	1	-	AC112187.3	-
ENSG00000251095	0.0001	0.0218217	-7.76962	0.648195	1	-	AC097478.1	-
ENSG00000267526	0.0001	0.0217643	-7.76582	0.644512	1	-	AC005702.3	-
ENSG00000235368	0.0001	0.0216693	-7.75951	0.648195	1	-	SAPCD2P2	suppressor APC domain containing 2 pseudogene 2 [Source:HGNC Symbol;Acc:HGNC:51278]
ENSG00000188389	0.0001	0.0216607	-7.75893	0.644512	1	-	PDCD1	programmed cell death 1 [Source:HGNC Symbol;Acc:HGNC:8760]
ENSG00000278381	0.0001	0.021632	-7.75702	0.812184	1	-	AL050303.3	-
ENSG00000138115	0.0001	0.02163	-7.75689	0.644512	1	-	CYP2C8	cytochrome P450 family 2 subfamily C member 8 [Source:HGNC Symbol;Acc:HGNC:2622]
ENSG00000280543	0.0001	0.021596	-7.75462	0.648195	1	-	ASAP1-IT2	ASAP1 intronic transcript 2 [Source:HGNC Symbol;Acc:HGNC:48917]
ENSG00000231124	0.0001	0.021546	-7.75128	0.812184	1	-	UBE2V1P11	ubiquitin conjugating enzyme E2 V1 pseudogene 11 [Source:HGNC Symbol;Acc:HGNC:44896]
ENSG00000166796	0.0001	0.0214903	-7.74754	0.648195	1	-	LDHC	lactate dehydrogenase C [Source:HGNC Symbol;Acc:HGNC:6544]
ENSG00000134612	0.0001	0.0213477	-7.73793	0.644512	1	-	FOLH1B	folate hydrolase 1B [Source:HGNC Symbol;Acc:HGNC:13636]
ENSG00000140522	0.0001	0.021304	-7.73498	0.644512	1	-	RLBP1	retinaldehyde binding protein 1 [Source:HGNC Symbol;Acc:HGNC:10024]
ENSG00000281392	0.0001	0.021298	-7.73457	0.471148	1	-	LINC00506	long intergenic non-protein coding RNA 506 [Source:NCBI gene;Acc:100846978]
ENSG00000168350	0.0001	0.021175	-7.72622	0.466529	1	-	DEGS2	delta 4-desaturase, sphingolipid 2 [Source:HGNC Symbol;Acc:HGNC:20113]
ENSG00000178882	0.0001	0.0211603	-7.72522	0.543585	1	-	RFLNA	refilin A [Source:HGNC Symbol;Acc:HGNC:27051]
ENSG00000250302	0.0001	0.021056	-7.71809	0.812184	1	-	LINC01618	long intergenic non-protein coding RNA 1618 [Source:HGNC Symbol;Acc:HGNC:27195]
ENSG00000150681	0.0001	0.021014	-7.71521	0.644512	1	-	RGS18	regulator of G protein signaling 18 [Source:HGNC Symbol;Acc:HGNC:14261]
ENSG00000250274	0.0001	0.0209857	-7.71326	0.644512	1	-	AC034199.1	-
ENSG00000280134	0.0001	0.0209453	-7.71049	0.644512	1	-	AL731532.2	-
ENSG00000261656	0.0001	0.0209073	-7.70787	0.812184	1	-	BEAN1-AS1	BEAN1 antisense RNA 1 [Source:HGNC Symbol;Acc:HGNC:51114]
ENSG00000281692	0.0001	0.02089	-7.70667	0.644512	1	-	PACRG-AS1	PACRG antisense RNA 1 [Source:HGNC Symbol;Acc:HGNC:27772]
ENSG00000036530	0.0001	0.0208457	-7.7036	0.37867	1	-	CYP46A1	cytochrome P450 family 46 subfamily A member 1 [Source:HGNC Symbol;Acc:HGNC:2641]
ENSG00000241527	0.0001	0.0208223	-7.70199	0.812184	1	-	CA15P1	carbonic anhydrase 15 pseudogene 1 [Source:HGNC Symbol;Acc:HGNC:44364]
ENSG00000223553	0.0001	0.0208073	-7.70095	0.648195	1	-	SMPD4P1	sphingomyelin phosphodiesterase 4 pseudogene 1 [Source:HGNC Symbol;Acc:HGNC:39673]
ENSG00000258893	0.0001	0.020769	-7.69829	0.812184	1	-	SETP2	SET pseudogene 2 [Source:HGNC Symbol;Acc:HGNC:20032]
ENSG00000225662	0.0001	0.0207687	-7.69826	0.812184	1	-	AC012519.1	-
ENSG00000242507	0.0001	0.020762	-7.6978	0.644512	1	-	FO393401.2	-
ENSG00000205097	0.0001	0.0206777	-7.69193	0.648195	1	-	FRG2	FSHD region gene 2 [Source:HGNC Symbol;Acc:HGNC:19136]
ENSG00000259293	0.0001	0.020653	-7.69021	0.63951	1	-	LIPC-AS1	LIPC antisense RNA 1 [Source:HGNC Symbol;Acc:HGNC:52294]
ENSG00000241469	0.0001	0.0206303	-7.68862	0.648195	1	-	LINC00635	long intergenic non-protein coding RNA 635 [Source:HGNC Symbol;Acc:HGNC:27184]
ENSG00000277087	0.0001	0.020538	-7.68215	0.812184	1	-	AL121890.3	-
ENSG00000230444	0.0001	0.020531	-7.68166	0.812184	1	-	TFAMP1	transcription factor A, mitochondrial pseudogene 1 [Source:HGNC Symbol;Acc:HGNC:11636]
ENSG00000127951	0.0001	0.0204847	-7.6784	0.47456	1	-	FGL2	fibrinogen like 2 [Source:HGNC Symbol;Acc:HGNC:3696]
ENSG00000269172	0.0001	0.020471	-7.67744	0.812184	1	-	AC011443.1	-
ENSG00000232994	0.0001	0.020462	-7.6768	0.642001	1	-	RPL7P14	ribosomal protein L7 pseudogene 14 [Source:HGNC Symbol;Acc:HGNC:35984]
ENSG00000214211	0.0001	0.0203897	-7.67169	0.540009	1	-	CTAGE14P	CTAGE family member 14, pseudogene [Source:HGNC Symbol;Acc:HGNC:37299]
ENSG00000226091	0.0001	0.0203843	-7.67132	0.812184	1	-	LINC00937	long intergenic non-protein coding RNA 937 [Source:HGNC Symbol;Acc:HGNC:48629]
ENSG00000103489	0.0001	0.0203757	-7.6707	0.812184	1	-	XYLT1	xylosyltransferase 1 [Source:HGNC Symbol;Acc:HGNC:15516]
ENSG00000244234	0.0001	0.020345	-7.66853	0.648195	1	-	GMCL1P1	germ cell-less, spermatogenesis associated 1 pseudogene 1 [Source:HGNC Symbol;Acc:HGNC:19717]
ENSG00000143171	0.0001	0.0202657	-7.66289	0.644512	1	-	RXRG	retinoid X receptor gamma [Source:HGNC Symbol;Acc:HGNC:10479]
ENSG00000146013	0.0001	0.0201367	-7.65368	0.644512	1	-	GFRA3	GDNF family receptor alpha 3 [Source:HGNC Symbol;Acc:HGNC:4245]
ENSG00000266707	0.0001	0.0201277	-7.65304	0.812184	1	-	AC006120.1	-
ENSG00000261437	0.0001	0.0200923	-7.6505	0.648195	1	-	AC108860.2	-
ENSG00000254450	0.0001	0.0200837	-7.64988	0.812184	1	-	ALG9-IT1	ALG9 intronic transcript 1 [Source:HGNC Symbol;Acc:HGNC:41409]
ENSG00000232006	0.0001	0.0200837	-7.64988	0.644512	1	-	AC005537.1	-
ENSG00000125508	0.0001	0.0200737	-7.64916	0.63951	1	-	SRMS	src-related kinase lacking C-terminal regulatory tyrosine and N-terminal myristylation sites [Source:HGNC Symbol;Acc:HGNC:11298]
ENSG00000213981	0.0001	0.0200373	-7.64655	0.648195	1	-	AC007277.1	-
ENSG00000243494	0.0001	0.0200113	-7.64467	0.812184	1	-	AC011476.1	-
ENSG00000278884	0.0001	0.019999	-7.64378	0.812184	1	-	CU634019.2	-
ENSG00000279127	0.0001	0.019989	-7.64306	0.644512	1	-	AL121950.1	-
ENSG00000238168	0.0001	0.0199877	-7.64297	0.812184	1	-	AC137055.1	-
ENSG00000267690	0.0001	0.0199877	-7.64297	0.63951	1	-	LDLRAD4-AS1	LDLRAD4 antisense RNA 1 [Source:HGNC Symbol;Acc:HGNC:48592]
ENSG00000188176	0.0001	0.0199497	-7.64022	0.644512	1	-	SMTNL2	smoothelin like 2 [Source:HGNC Symbol;Acc:HGNC:24764]
ENSG00000080293	0.0001	0.0199263	-7.63853	0.644512	1	-	SCTR	secretin receptor [Source:HGNC Symbol;Acc:HGNC:10608]
ENSG00000251576	0.0001	0.019848	-7.63285	0.644512	1	-	LINC01267	long intergenic non-protein coding RNA 1267 [Source:HGNC Symbol;Acc:HGNC:50320]
ENSG00000219926	0.0001	0.0198007	-7.62941	0.812184	1	-	AL445238.1	-
ENSG00000161992	0.0001	0.0197933	-7.62887	0.648195	1	-	PRR35	proline rich 35 [Source:HGNC Symbol;Acc:HGNC:14139]
ENSG00000227742	0.0001	0.0196867	-7.62108	0.812184	1	-	CALR4P	calreticulin 4, pseudogene [Source:HGNC Symbol;Acc:HGNC:35456]
ENSG00000162771	0.0001	0.019667	-7.61963	0.644512	1	-	FAM71A	family with sequence similarity 71 member A [Source:HGNC Symbol;Acc:HGNC:26541]
ENSG00000226526	0.0001	0.0196623	-7.61929	0.812184	1	-	AL049569.1	-
ENSG00000242068	0.0001	0.0196527	-7.61858	0.812184	1	-	AC108734.3	-
ENSG00000277526	0.0001	0.0195737	-7.61277	0.644512	1	-	AC245123.1	-
ENSG00000275410	0.0001	0.0195467	-7.61078	0.543585	1	-	HNF1B	HNF1 homeobox B [Source:HGNC Symbol;Acc:HGNC:11630]
ENSG00000064886	0.0001	0.019493	-7.60681	0.644512	1	-	CHI3L2	chitinase 3 like 2 [Source:HGNC Symbol;Acc:HGNC:1933]
ENSG00000236583	0.0001	0.0194707	-7.60516	0.63951	1	-	AP004290.1	-
ENSG00000284439	0.0001	0.0194043	-7.60024	0.643821	1	-	AC106774.9	-
ENSG00000115165	0.0001	0.0193433	-7.59569	0.648195	1	-	CYTIP	cytohesin 1 interacting protein [Source:HGNC Symbol;Acc:HGNC:9506]
ENSG00000207716	0.0001	0.0193353	-7.5951	0.812184	1	-	MIR572	microRNA 572 [Source:HGNC Symbol;Acc:HGNC:32828]
ENSG00000132517	0.0001	0.0193193	-7.5939	0.63951	1	-	SLC52A1	solute carrier family 52 member 1 [Source:HGNC Symbol;Acc:HGNC:30225]
ENSG00000232228	0.0001	0.01931	-7.5932	0.812184	1	-	AC092431.2	-
ENSG00000282840	0.0001	0.01931	-7.5932	0.63951	1	-	AC004554.2	-
ENSG00000266709	0.0001	0.0192933	-7.59196	0.648195	1	-	AC005224.4	-
ENSG00000088882	0.0001	0.019271	-7.59029	0.63951	1	-	CPXM1	carboxypeptidase X, M14 family member 1 [Source:HGNC Symbol;Acc:HGNC:15771]
ENSG00000252132	0.0001	0.0192647	-7.58981	0.812184	1	-	RNU6-795P	RNA, U6 small nuclear 795, pseudogene [Source:HGNC Symbol;Acc:HGNC:47758]
ENSG00000263609	0.0001	0.019241	-7.58804	0.648195	1	-	LINC02002	long intergenic non-protein coding RNA 2002 [Source:HGNC Symbol;Acc:HGNC:52837]
ENSG00000148156	0.0001	0.019239	-7.58789	0.63951	1	-	ACTL7B	actin like 7B [Source:HGNC Symbol;Acc:HGNC:162]
ENSG00000261210	0.0001	0.0192317	-7.58734	0.644512	1	-	CLEC19A	C-type lectin domain containing 19A [Source:HGNC Symbol;Acc:HGNC:34522]
ENSG00000121380	0.0001	0.0191467	-7.58095	0.63951	1	-	BCL2L14	BCL2 like 14 [Source:HGNC Symbol;Acc:HGNC:16657]
ENSG00000275614	0.0001	0.0190793	-7.57587	0.812184	1	-	AL627230.3	-
ENSG00000276490	0.0001	0.0190553	-7.57405	0.644512	1	-	AL583836.1	-
ENSG00000260416	0.0001	0.0190477	-7.57347	0.648195	1	-	AL096828.2	-
ENSG00000180613	0.0001	0.019029	-7.57206	0.812184	1	-	GSX2	GS homeobox 2 [Source:HGNC Symbol;Acc:HGNC:24959]
ENSG00000258130	0.0001	0.018999	-7.56978	0.648195	1	-	AC106782.1	-
ENSG00000258150	0.0001	0.018999	-7.56978	0.648195	1	-	AC133555.3	-
ENSG00000231357	0.0001	0.0189847	-7.56869	0.812184	1	-	AC006028.1	-
ENSG00000230214	0.0001	0.01897	-7.56758	0.812184	1	-	FTLP18	ferritin light chain pseudogene 18 [Source:HGNC Symbol;Acc:HGNC:37968]
ENSG00000255000	0.0001	0.0189377	-7.56511	0.812184	1	-	AC139103.1	-
ENSG00000187151	0.0001	0.0189353	-7.56494	0.63951	1	-	ANGPTL5	angiopoietin like 5 [Source:HGNC Symbol;Acc:HGNC:19705]
ENSG00000111981	0.0001	0.0189173	-7.56356	0.535162	1	-	ULBP1	UL16 binding protein 1 [Source:HGNC Symbol;Acc:HGNC:14893]
ENSG00000280159	0.0001	0.018836	-7.55735	0.644512	1	-	AC016583.1	-
ENSG00000227117	0.0001	0.0188103	-7.55538	0.812184	1	-	HORMAD2-AS1	HORMAD2 antisense RNA 1 [Source:HGNC Symbol;Acc:HGNC:50729]
ENSG00000232030	0.0001	0.0187637	-7.5518	0.642001	1	-	MAGEB6P1	MAGE family member B6 pseudogene 1 [Source:HGNC Symbol;Acc:HGNC:28824]
ENSG00000278914	0.0001	0.0187447	-7.55034	0.812184	1	-	AP003355.3	-
ENSG00000160868	0.0001	0.0187283	-7.54908	0.648195	1	-	CYP3A4	cytochrome P450 family 3 subfamily A member 4 [Source:HGNC Symbol;Acc:HGNC:2637]
ENSG00000228074	0.0001	0.018688	-7.54597	0.812184	1	-	UBBP5	ubiquitin B pseudogene 5 [Source:HGNC Symbol;Acc:HGNC:42645]
ENSG00000227619	0.0001	0.0186353	-7.5419	0.644512	1	-	AL391056.1	-
ENSG00000254444	0.0001	0.018634	-7.54179	0.812184	1	-	AC022762.1	-
ENSG00000276651	0.0001	0.0186263	-7.5412	0.648195	1	-	AC007950.2	-
ENSG00000250900	0.0001	0.0185653	-7.53647	0.812184	1	-	AC008443.6	-
ENSG00000228784	0.0001	0.0185237	-7.53323	0.644512	1	-	LINC00954	long intergenic non-protein coding RNA 954 [Source:HGNC Symbol;Acc:HGNC:48668]
ENSG00000204603	0.0001	0.0185163	-7.53265	0.644512	1	-	LINC01257	long intergenic non-protein coding RNA 1257 [Source:HGNC Symbol;Acc:HGNC:26972]
ENSG00000186086	0.0001	0.018475	-7.52943	0.63951	1	-	NBPF6	NBPF member 6 [Source:HGNC Symbol;Acc:HGNC:31988]
ENSG00000251288	0.0001	0.018449	-7.5274	0.812184	1	-	AC018797.3	-
ENSG00000227832	0.000654333	0.120532	-7.52518	0.314858	1	-	ST13P21	ST13, Hsp70 interacting protein pseudogene 21 [Source:HGNC Symbol;Acc:HGNC:38864]
ENSG00000225774	0.0001	0.018396	-7.52325	0.63951	1	-	SIRPAP1	signal regulatory protein alpha pseudogene 1 [Source:HGNC Symbol;Acc:HGNC:9663]
ENSG00000279801	0.0001	0.0181503	-7.50385	0.644512	1	-	AC111170.3	-
ENSG00000275850	0.0001	0.018093	-7.49929	0.648195	1	-	AC005912.2	-
ENSG00000221994	0.0001	0.018062	-7.49681	0.648195	1	-	ZNF630	zinc finger protein 630 [Source:HGNC Symbol;Acc:HGNC:28855]
ENSG00000213729	0.0001	0.0180387	-7.49495	0.812184	1	-	AC098828.1	-
ENSG00000274759	0.0001	0.0180277	-7.49407	0.812184	1	-	5S_rRNA	5S ribosomal RNA [Source:RFAM;Acc:RF00001]
ENSG00000237959	0.0001	0.0180127	-7.49287	0.812184	1	-	RPL36AP10	ribosomal protein L36a pseudogene 10 [Source:HGNC Symbol;Acc:HGNC:36175]
ENSG00000249717	0.0001	0.0179853	-7.49068	0.644512	1	-	AC110760.2	-
ENSG00000264675	0.0001	0.017957	-7.4884	0.812184	1	-	MIR4285	microRNA 4285 [Source:HGNC Symbol;Acc:HGNC:38337]
ENSG00000250682	0.0001	0.017957	-7.4884	0.812184	1	-	LINC00491	long intergenic non-protein coding RNA 491 [Source:HGNC Symbol;Acc:HGNC:43428]
ENSG00000266946	0.0001	0.017934	-7.48655	0.648195	1	-	MRPL37P1	mitochondrial ribosomal protein L37 pseudogene 1 [Source:HGNC Symbol;Acc:HGNC:31003]
ENSG00000135443	0.0001	0.0179247	-7.4858	0.648195	1	-	KRT85	keratin 85 [Source:HGNC Symbol;Acc:HGNC:6462]
ENSG00000162344	0.0001	0.0179247	-7.4858	0.648195	1	-	FGF19	fibroblast growth factor 19 [Source:HGNC Symbol;Acc:HGNC:3675]
[truncated: 56,176 more rows]
